# Supplementary material for: An Improved Multithreshold Segmentation Algorithm Based on Graph Cuts Applicable for Irregular Image
Source: Hindawi journal article supplement (doi:10.1155/2019/3514258), 2019-01-01
Supplement: f1 [file 3514258.f1.pdf]

Table1 segmentation results of 100 pictures in Berkeley datasets

| Image ID  | level | Our algorithm  | BA             | MMSA           | IBA            | OTSU           |
|-----------|-------|----------------|----------------|----------------|----------------|----------------|
| 101085    | 2     | 63             | 68             | 62             | 69             | 63             |
| (321×481) | 3     | 60,108         | 65,114         | 61,105         | 66,109         | 62,106         |
|           | 4     | 52,121,175     | 56,124,173     | 50,123,180     | 50,124,172     | 51,122,176     |
|           | 5     | 47,136,188,216 | 52,136,192,219 | 47,139,188,213 | 51,135,189,218 | 49,136,189,216 |
| 119082    | 2     | 87             | 92             | 85             | 88             | 88             |
| (481×321) | 3     | 73,132         | 79,130         | 74,138         | 70,132         | 75,132         |
|           | 4     | 70,129,186     | 70,130,188     | 74,136,187     | 69,128,193     | 69,132,189     |
|           | 5     | 65,121,172,229 | 62,124,176,233 | 70,129,177,236 | 67,128,176,228 | 63,122,174,229 |
| 126007    | 2     | 97             | 101            | 97             | 104            | 100            |
| (481×321) | 3     | 86,128         | 85,132         | 91,135         | 94,136         | 84,127         |
|           | 4     | 80,128,173     | 84,125,177     | 79,125,179     | 84,135,177     | 82,127,172     |
|           | 5     | 72,128,173,229 | 74,127,172,232 | 69,128,171,236 | 78,128,174,236 | 72,129,173,230 |
| 156065    | 2     | 102            | 104            | 105            | 103            | 103            |
| (481×321) | 3     | 94,128         | 95,129         | 92,127         | 97,131         | 97,131         |
|           | 4     | 85,119,181     | 87,115,185     | 83,119,184     | 93,116,181     | 88,119,184     |
|           | 5     | 78,107,165,225 | 76,103,170,223 | 79,109,168,231 | 77,104,164,229 | 80,107,165,224 |
| 157055    | 2     | 117            | 123            | 125            | 119            | 120            |
| (481×321) | 3     | 102,136        | 103,136        | 100,136        | 106,134        | 100,139        |
|           | 4     | 94,125,175     | 91,126,175     | 99,130,183     | 98,130,176     | 92,124,175     |
|           | 5     | 83,110,163,205 | 81,114,165,208 | 80,109,169,208 | 82,110,163,209 | 85,108,161,207 |
| 16077     | 2     | 86             | 91             | 83             | 94             | 85             |
| (481×321) | 3     | 90,140         | 95,145         | 94,148         | 97,148         | 90,140         |
|           | 4     | 72,111,149     | 70,110,149     | 71,108,151     | 80,118,155     | 70,110,148     |
|           | 5     | 46,87,139,194  | 52,84,144,196  | 43,94,139,200  | 44,89,141,196  | 49,88,139,193  |
| 163085    | 2     | 93             | 93             | 99             | 90             | 96             |
| (481×321) | 3     | 85,117         | 86,121         | 90,124         | 93,121         | 84,116         |
|           | 4     | 78,104,138     | 81,102,140     | 82,105,137     | 83,104,146     | 78,102,136     |
|           | 5     | 71,96,129,173  | 73,97,132,179  | 69,93,128,175  | 76,99,126,172  | 74,95,130,174  |
| 167062    | 2     | 102            | 99             | 99             | 100            | 103            |
| (481×321) | 3     | 91,143         | 92,140         | 99,146         | 92,145         | 94,146         |
|           | 4     | 85,136,188     | 82,140,186     | 84,135,193     | 91,142,190     | 88,134,191     |
|           | 5     | 78,115,174,225 | 81,118,175,227 | 80,120,171,228 | 81,118,173,223 | 79,113,175,223 |
| 170057    | 2     | 115            | 120            | 120            | 114            | 117            |
| (481×321) | 3     | 106,134        | 107,138        | 109,134        | 104,133        | 105,135        |
|           | 4     | 98,121,162     | 100,117,160    | 100,127,165    | 95,118,166     | 98,121,161     |
|           | 5     | 84,114,152,197 | 86,117,153,200 | 84,115,150,195 | 84,115,155,196 | 86,116,153,199 |
| 175032    | 2     | 102            | 106            | 103            | 108            | 104            |
| (321×481) | 3     | 89,123         | 87,124         | 92,130         | 87,121         | 92,123         |
|           | 4     | 81,112,154     | 77,110,157     | 87,110,157     | 78,110,158     | 82,114,155     |
|           | 5     | 76,106,145,190 | 81,105,147,186 | 83,113,151,194 | 81,106,152,195 | 76,109,145,192 |
| 219090    | 2     | 99             | 99             | 105            | 98             | 100            |

|           |   |                |                |                 |                |                 |
|-----------|---|----------------|----------------|-----------------|----------------|-----------------|
| (481×321) | 3 | 91,127         | 93,127         | 98,126          | 99,124         | 93,129          |
|           | 4 | 82,121,143     | 83,127,141     | 84,120,146      | 84,120,148     | 83,119,146      |
|           | 5 | 80,119,136,177 | 82,123,142,181 | 84,126,144,181  | 84,123,139,184 | 81,117,139,178  |
| 220075    | 2 | 123            | 124            | 130             | 125            | 123             |
| (481×321) | 3 | 111,143        | 107,149        | 110,145         | 116,151        | 109,141         |
|           | 4 | 105,132,162    | 105,129,167    | 102,130,166     | 110,138,159    | 104,134,161     |
|           | 5 | 98,126,148,201 | 94,131,151,205 | 103,125,153,207 | 98,127,151,200 | 101,129,147,204 |
| 24077     | 2 | 141            | 136            | 138             | 142            | 145             |
| (481×321) | 3 | 135,186        | 131,190        | 133,181         | 129,184        | 134, 181        |
|           | 4 | 121,167,201    | 117,160,196    | 119,162,203     | 123,171,204    | 118,164,205     |
|           | 5 | 89,141,181,230 | 84,136,179,224 | 86,137,183,239  | 91,145,183,235 | 88,139,183,226  |
| 295087    | 2 | 117            | 123            | 120             | 122            | 118             |
| (481×321) | 3 | 104,130        | 104,131        | 107,130         | 108,128        | 103,128         |
|           | 4 | 96,121,160     | 102,119,161    | 100,120,161     | 95,127,160     | 97,124,161      |
|           | 5 | 85,107,146,184 | 84,108,151,188 | 93,105,150,192  | 88,112,149,182 | 85,105,147,183  |
| 296007    | 2 | 112            | 110            | 117             | 110            | 113             |
| (481×321) | 3 | 96,130         | 102,128        | 99,128          | 98,128         | 95,129          |
|           | 4 | 88,121,145     | 90,126,143     | 85,129,142      | 93,120,143     | 86,124,147      |
|           | 5 | 71,105,124,175 | 70,111,126,175 | 69,105,121,172  | 71,104,129,178 | 72,103,122,178  |
| 300091    | 2 | 106            | 107            | 113             | 104            | 109             |
| (481×321) | 3 | 98,125         | 98,130         | 106,128         | 102,132        | 98,128          |
|           | 4 | 82,115,138     | 82,120,138     | 82,122,140      | 89,123,141     | 81,118,141      |
|           | 5 | 77,103,124,173 | 78,107,129,174 | 84,109,131,180  | 77,100,122,177 | 78,105,126,173  |
| 38092     | 2 | 145            | 151            | 147             | 148            | 145             |
| (481×321) | 3 | 95,165         | 98,171         | 103,165         | 98,173         | 95,165          |
|           | 4 | 61,124,181     | 62,129,180     | 69,131,184      | 65,129,182     | 61,122,183      |
|           | 5 | 52,101,161,225 | 57,99,158,224  | 57,101,169,226  | 49,101,165,223 | 50,102,160,227  |
| 42049     | 2 | 88             | 84             | 85              | 86             | 85              |
| (481×321) | 3 | 66,165         | 62,161         | 63,162          | 64,167         | 64,163          |
|           | 4 | 41,124,221     | 42,128,218     | 45,130,215      | 39,129,224     | 42,126,225      |
|           | 5 | 45,91,161,235  | 40,93,167,228  | 41,86,158,229   | 48,96,168,231  | 42,89,159,231   |
| 43074     | 2 | 82             | 87             | 84              | 80             | 83              |
| (481×321) | 3 | 74,138         | 72,140         | 76,142          | 80,135         | 73,138          |
|           | 4 | 65,124,164     | 65,123,163     | 66,130,172      | 65,129,163     | 65,127,167      |
|           | 5 | 62,112,145,190 | 68,113,146,194 | 60,111,151,191  | 63,113,147,187 | 60,114,146,193  |
| 45096     | 2 | 52             | 48             | 57              | 49             | 50              |
| (481×321) | 3 | 51,104         | 47,100         | 59,110          | 48,103         | 51,102          |
|           | 4 | 46,98,156      | 45,97,155      | 49,103,161      | 53,101,160     | 46,101,154      |
|           | 5 | 42,86,135,212  | 40,86,140,209  | 49,93,132,212   | 43,93,134,218  | 40,89,137,214   |
| 58060     | 2 | 76             | 77             | 81              | 77             | 77              |
| (481×321) | 3 | 71,91          | 73,88          | 78,88           | 74,93          | 70,91           |
|           | 4 | 62,82,156      | 60,84,162      | 61,89,156       | 65,80,158      | 62,81,157       |
|           | 5 | 50,72,173,197  | 47,75,177,194  | 47,72,177,196   | 52,72,179,197  | 52,72,173,196   |
| 76053     | 2 | 99             | 99             | 98              | 107            | 100             |

|           |   |                |                |                |                |                |
|-----------|---|----------------|----------------|----------------|----------------|----------------|
| (481×321) | 3 | 86,145         | 88,141         | 91,148         | 86,148         | 87,146         |
|           | 4 | 81,135,173     | 82,138,172     | 81,135,178     | 81,138,175     | 80,135,172     |
|           | 5 | 71,124,151,208 | 68,120,156,208 | 72,124,149,210 | 79,127,148,214 | 73,125,154,206 |
| 78004     | 2 | 115            | 112            | 122            | 112            | 118            |
| (321×481) | 3 | 95,160         | 93,165         | 94,166         | 93,163         | 94,162         |
|           | 4 | 84,146,173     | 81,142,175     | 90,144,178     | 85,145,175     | 85,144,174     |
|           | 5 | 76,131,161,213 | 75,135,161,217 | 84,134,163,221 | 78,128,164,212 | 75,133,160,212 |
| 86000     | 2 | 102            | 100            | 102            | 106            | 100            |
| (321×481) | 3 | 98,143         | 103,141        | 97,142         | 97,151         | 98,146         |
|           | 4 | 81,125,179     | 87,126,175     | 85,132,184     | 82,130,187     | 82,125,179     |
|           | 5 | 73,114,156,210 | 72,118,152,206 | 77,115,162,209 | 70,114,158,207 | 74,116,157,212 |
| 89072     | 2 | 134            | 131            | 132            | 134            | 132            |
| (321×481) | 3 | 104,154        | 101,152        | 99,157         | 103,159        | 105,156        |
|           | 4 | 97,137,181     | 91,132,180     | 92,135,183     | 94,134,184     | 93,136,186     |
|           | 5 | 84,143,175,236 | 81,137,171,232 | 79,136,172,231 | 82,135,177,239 | 80,140,172,234 |
| 103070    | 2 | 102            | 101            | 103            | 101            | 101            |
| (481×321) | 3 | 86,131         | 91,134         | 94,128         | 94,131         | 89,132         |
|           | 4 | 81,112,141     | 86,115,142     | 89,118,145     | 83,117,147     | 81,112,143     |
|           | 5 | 72,94,154,185  | 68,96,160,188  | 73,96,158,191  | 76,94,156,187  | 75,94,155,183  |
| 108082    | 2 | 69             | 70             | 69             | 74             | 71             |
| (481×321) | 3 | 60,127         | 66,132         | 65,124         | 65,124         | 60,129         |
|           | 4 | 54,114,177     | 53,115,176     | 60,113,180     | 59,118,176     | 54,112,180     |
|           | 5 | 51,103,154,208 | 56,107,152,208 | 55,105,154,205 | 57,105,162,207 | 54,101,153,211 |
| 109053    | 2 | 117            | 120            | 114            | 114            | 117            |
| (481×321) | 3 | 102,154        | 107,151        | 105,158        | 101,159        | 102,157        |
|           | 4 | 92,141,201     | 91,137,202     | 93,145,207     | 94,145,206     | 94,139,199     |
|           | 5 | 78,130,184,211 | 80,135,180,217 | 82,135,184,217 | 76,130,189,209 | 77,132,182,212 |
| 12084     | 2 | 115            | 111            | 113            | 117            | 113            |
| (481×321) | 3 | 101,162        | 100,167        | 107,163        | 98,162         | 104,165        |
|           | 4 | 94,146,186     | 98,142,185     | 99,146,193     | 92,147,193     | 96,147,188     |
|           | 5 | 91,132,162,201 | 95,130,161,205 | 92,129,160,202 | 91,133,170,203 | 90,131,161,202 |
| 130026    | 2 | 104            | 100            | 101            | 102            | 106            |
| (481×321) | 3 | 74,125         | 74,130         | 79,127         | 80,127         | 72,124         |
|           | 4 | 71,116,177     | 69,119,182     | 70,118,176     | 70,118,183     | 69,114,176     |
|           | 5 | 65,105,157,214 | 71,105,156,219 | 63,112,160,213 | 65,104,154,214 | 63,104,158,213 |
| 14037     | 2 | 78             | 75             | 86             | 78             | 78             |
| (481×321) | 3 | 70,143         | 76,145         | 73,143         | 69,144         | 72,145         |
|           | 4 | 65,134,194     | 64,134,193     | 72,140,202     | 68,133,200     | 64,137,197     |
|           | 5 | 59,116,191,220 | 64,116,195,221 | 64,118,193,219 | 60,119,189,225 | 58,115,191,220 |
| 147091    | 2 | 84             | 89             | 84             | 91             | 82             |
| (481×321) | 3 | 78,188         | 84,191         | 77,187         | 85,188         | 78,191         |
|           | 4 | 76,147,190     | 81,147,195     | 75,151,196     | 84,155,195     | 79,147,189     |
|           | 5 | 70,136,181,210 | 76,137,178,214 | 76,144,178,209 | 73,144,178,214 | 69,136,181,211 |
| 148089    | 2 | 130            | 132            | 133            | 128            | 130            |

|           |   |                |                |                |                |                |
|-----------|---|----------------|----------------|----------------|----------------|----------------|
| (481×321) | 3 | 89,138         | 88,142         | 94,135         | 91,138         | 89,141         |
|           | 4 | 76,134,190     | 72,133,194     | 78,136,195     | 79,136,191     | 74,133,188     |
|           | 5 | 71,112,167,201 | 72,114,173,197 | 72,118,168,198 | 72,118,174,204 | 70,115,165,202 |
| 167083    | 2 | 82             | 78             | 82             | 89             | 85             |
| (321×481) | 3 | 75,112         | 73,114         | 72,115         | 76,109         | 78,113         |
|           | 4 | 68,101,172     | 72,107,178     | 66,100,177     | 69,98,169      | 67,100,172     |
|           | 5 | 62,99,144,196  | 68,97,146,201  | 64,100,149,198 | 59,98,148,193  | 60,100,145,194 |
| 189080    | 2 | 141            | 138            | 142            | 149            | 139            |
| (321×481) | 3 | 80,162         | 79,158         | 77,163         | 83,169         | 79,165         |
|           | 4 | 74,145,168     | 71,150,167     | 72,152,171     | 73,143,170     | 76,148,168     |
|           | 5 | 62,131,154,186 | 60,135,154,190 | 65,134,162,183 | 68,132,159,188 | 60,134,156,187 |
| 229036    | 2 | 76             | 77             | 73             | 80             | 74             |
| (481×321) | 3 | 67,130         | 71,135         | 75,135         | 73,129         | 67,130         |
|           | 4 | 61,121,158     | 57,123,163     | 62,129,155     | 61,127,162     | 63,124,156     |
|           | 5 | 56,105,131,187 | 52,105,128,187 | 63,108,137,185 | 57,108,139,188 | 57,108,133,189 |
| 241004    | 2 | 87             | 88             | 92             | 90             | 86             |
| (481×321) | 3 | 76,117         | 78,122         | 73,116         | 78,114         | 77,120         |
|           | 4 | 71,105,158     | 71,106,156     | 79,113,166     | 74,112,161     | 74,105,161     |
|           | 5 | 65,96,138,199  | 69,99,139,205  | 63,104,145,197 | 62,100,142,205 | 65,97,140,199  |
| 253027    | 2 | 121            | 123            | 127            | 123            | 120            |
| (481×321) | 3 | 86,151         | 87,147         | 89,157         | 86,152         | 84,151         |
|           | 4 | 81,142,175     | 84,139,171     | 83,142,181     | 81,145,177     | 80,145,173     |
|           | 5 | 80,121,165,203 | 82,127,161,209 | 78,126,171,203 | 79,123,168,207 | 83,122,166,202 |
| 260058    | 2 | 154            | 150            | 157            | 162            | 152            |
| (481×321) | 3 | 93,171         | 94,172         | 93,171         | 96,171         | 94,173         |
|           | 4 | 87,161,201     | 83,160,207     | 84,164,208     | 94,168,208     | 87,160,202     |
|           | 5 | 81,154,182,221 | 81,150,184,227 | 89,160,179,229 | 88,158,181,223 | 79,153,180,220 |
| 271035    | 2 | 111            | 112            | 113            | 119            | 112            |
| (321×481) | 3 | 61,151         | 66,157         | 68,153         | 60,156         | 63,151         |
|           | 4 | 69,142,171     | 74,143,168     | 76,150,171     | 75,144,171     | 68,141,172     |
|           | 5 | 71,134,166,195 | 73,137,168,194 | 69,137,173,195 | 77,132,164,198 | 73,136,165,198 |
| 285079    | 2 | 115            | 116            | 123            | 114            | 118            |
| (321×481) | 3 | 104,138        | 100,136        | 104,136        | 106,141        | 105,140        |
|           | 4 | 98,128,171     | 97,128,170     | 101,134,170    | 102,136,168    | 96,131,172     |
|           | 5 | 86,123,163,195 | 91,119,166,201 | 84,123,165,194 | 86,121,160,202 | 84,122,165,197 |
| 291000    | 2 | 87             | 85             | 92             | 86             | 85             |
| (481×321) | 3 | 81,136         | 77,139         | 86,136         | 88,140         | 83,139         |
|           | 4 | 73,131,168     | 69,136,165     | 78,139,176     | 79,136,171     | 74,130,168     |
|           | 5 | 69,124,141,194 | 70,128,147,192 | 66,126,138,202 | 77,124,149,194 | 72,122,142,194 |
| 304034    | 2 | 63             | 62             | 61             | 63             | 64             |
| (481×321) | 3 | 61,126         | 62,128         | 61,132         | 67,125         | 60,126         |
|           | 4 | 59,93,150      | 57,91,156      | 63,95,154      | 64,91,158      | 60,91,149      |
|           | 5 | 56,88,133,192  | 56,92,138,190  | 59,89,138,200  | 59,94,134,194  | 59,89,133,192  |
| 41033     | 2 | 95             | 100            | 102            | 95             | 95             |

|           |   |                 |                 |                 |                 |                 |
|-----------|---|-----------------|-----------------|-----------------|-----------------|-----------------|
| (481×321) | 3 | 78,97           | 82,96           | 84,97           | 81,105          | 81,98           |
|           | 4 | 74,96,149       | 78,95,147       | 79,93,152       | 76,99,156       | 72,95,151       |
|           | 5 | 68,92,142,203   | 67,96,145,202   | 73,94,141,204   | 74,89,147,206   | 70,93,142,204   |
| 54082     | 2 | 73              | 71              | 72              | 72              | 73              |
| (321×481) | 3 | 48,87           | 45,86           | 46,89           | 45,86           | 47,88           |
|           | 4 | 35,52,121       | 32,54,125       | 36,56,124       | 33,51,118       | 32,50,124       |
|           | 5 | 50,93,130,192   | 48,89,126,188   | 46,91,135,196   | 47,96,126,190   | 48,91,128,195   |
| 62096     | 2 | 107             | 113             | 114             | 112             | 106             |
| (481×321) | 3 | 89,123          | 94,121          | 97,130          | 94,122          | 87,123          |
|           | 4 | 67,114,169      | 67,119,165      | 64,116,167      | 71,117,170      | 70,112,167      |
|           | 5 | 61,105,154,192  | 65,101,153,189  | 58,112,159,198  | 62,110,157,192  | 64,103,156,190  |
| 69015     | 2 | 74              | 80              | 72              | 74              | 74              |
| (321×481) | 3 | 61,132          | 58,136          | 66,140          | 65,132          | 60,130          |
|           | 4 | 60,122,182      | 56,118,178      | 59,130,184      | 57,128,182      | 62,122,183      |
|           | 5 | 52,119,157,206  | 52,120,163,209  | 56,116,160,214  | 57,117,159,203  | 53,120,156,207  |
| 69040     | 2 | 102             | 101             | 108             | 104             | 103             |
| (481×321) | 3 | 91,140          | 97,136          | 92,145          | 98,141          | 93,143          |
|           | 4 | 84,131,171      | 90,134,172      | 87,130,171      | 85,139,179      | 86,131,170      |
|           | 5 | 76,122,152,194  | 75,119,149,193  | 77,127,157,193  | 78,122,155,199  | 79,120,152,193  |
| 8023      | 2 | 141             | 147             | 148             | 145             | 141             |
| (481×321) | 3 | 114,194         | 116,190         | 122,201         | 115,191         | 116,197         |
|           | 4 | 104,162,203     | 106,166,202     | 101,163,205     | 109,164,207     | 104,161,202     |
|           | 5 | 99,154,186,215  | 102,151,190,212 | 97,151,183,219  | 103,159,191,219 | 101,153,187,215 |
| 86016     | 2 | 95              | 91              | 92              | 91              | 93              |
| (481×321) | 3 | 87,121          | 83,119          | 84,116          | 82,123,         | 85,125          |
|           | 4 | 82,124,152      | 81,126,151      | 84,123,147      | 79,119,143      | 81,126,151      |
|           | 5 | 71,129,152,201  | 73,132,156,205  | 69,128,153,206  | 74,131,156,206  | 76,132,149,204  |
| 108005    | 2 | 102             | 98              | 109             | 102             | 102             |
| (481×321) | 3 | 75,112          | 77,116          | 79,116          | 72,109          | 74,114          |
|           | 4 | 78,121,138      | 82,117,142      | 81,122,145      | 80,124,142      | 80,124,140      |
|           | 5 | 71,122,151,186  | 70,121,153,184  | 70,123,157,191  | 72,119,151,190  | 71,120,149,185  |
| 108070    | 2 | 99              | 98              | 96              | 104             | 100             |
| (481×321) | 3 | 86,175          | 86,178          | 86,181          | 86,172          | 88,174          |
|           | 4 | 73,141,205      | 78,144,204      | 81,140,205      | 77,143,205      | 75,139,205      |
|           | 5 | 70,121,171,221  | 67,117,176,223  | 69,120,168,222  | 68,129,168,224  | 69,123,172,224  |
| 123074    | 2 | 114             | 113             | 121             | 117             | 116             |
| (481×321) | 3 | 114,164         | 113,168         | 115,168         | 111,166         | 117,166         |
|           | 4 | 104,143,185     | 108,145,184     | 105,144,193     | 112,145,186     | 102,144,185     |
|           | 5 | 101,123,162,194 | 103,119,160,200 | 101,123,165,193 | 105,127,168,195 | 100,125,164,196 |
| 134035    | 2 | 115             | 113             | 116             | 113             | 114             |
| (481×321) | 3 | 91,151          | 94,147          | 92,153          | 90,158          | 93,152          |
|           | 4 | 84,145,175      | 81,150,173      | 83,146,175      | 87,148,183      | 87,146,178      |
|           | 5 | 78,130,164,204  | 83,136,167,207  | 84,134,168,205  | 82,130,168,212  | 78,131,165,207  |
| 145086    | 2 | 114             | 117             | 122             | 118             | 115             |

|           |   |                |                |                |                |                |
|-----------|---|----------------|----------------|----------------|----------------|----------------|
| (481×321) | 3 | 90,149         | 91,145         | 90,147         | 98,157         | 89,148         |
|           | 4 | 75,120,169     | 80,119,175     | 79,124,171     | 75,119,176     | 78,119,167     |
|           | 5 | 65,108,154,198 | 62,107,153,196 | 67,105,153,202 | 69,107,152,198 | 66,106,156,197 |
| 148026    | 2 | 125            | 121            | 130            | 123            | 125            |
| (321×481) | 3 | 114,177        | 118,180        | 121,182        | 119,182        | 115,178        |
|           | 4 | 82,153,190     | 82,152,194     | 89,150,188     | 87,156,189     | 83,156,190     |
|           | 5 | 81,132,184,208 | 85,128,185,211 | 83,133,188,205 | 78,139,192,212 | 84,132,183,210 |
| 160068    | 2 | 119            | 116            | 117            | 117            | 118            |
| (481×321) | 3 | 117,169        | 112,170        | 115,172,       | 120,168,       | 119,171        |
|           | 4 | 82,120,158     | 80,124,160     | 79,121,162     | 78,123,159     | 80,124,160     |
|           | 5 | 90,121,150,200 | 91,125,153,204 | 92,123,154,203 | 87,118,151,197 | 88,120,154,201 |
| 182053    | 2 | 110            | 116            | 112            | 114            | 108            |
| (481×321) | 3 | 87,164         | 85,170         | 88,172         | 87,163         | 85,163         |
|           | 4 | 74,141,178     | 77,141,176     | 71,138,186     | 73,145,184     | 75,139,180     |
|           | 5 | 73,128,161,201 | 72,129,163,207 | 77,134,162,205 | 74,130,165,206 | 74,130,164,199 |
| 19021     | 2 | 91             | 96             | 90             | 90             | 91             |
| (481×321) | 3 | 83,141         | 87,138         | 86,140         | 83,147         | 84,139         |
|           | 4 | 80,132,186     | 82,131,191     | 83,135,194     | 82,137,185     | 79,135,187     |
|           | 5 | 77,92,162,211  | 80,88,158,213  | 79,93,164,210  | 83,89,163,216  | 78,90,161,214  |
| 196073    | 2 | 125            | 121            | 128            | 124            | 124            |
| (481×321) | 3 | 114,154        | 120,156        | 120,156        | 111,155        | 117,153        |
|           | 4 | 102,123,167    | 106,124,164    | 107,128,174    | 108,120,168    | 105,121,170    |
|           | 5 | 91,114,138,186 | 93,117,143,183 | 93,120,144,191 | 98,111,141,191 | 93,115,138,186 |
| 208001    | 2 | 80             | 78             | 88             | 77             | 79             |
| (321×481) | 3 | 79,154         | 81,151         | 81,151         | 82,154         | 78,152         |
|           | 4 | 75,136,171     | 74,138,171     | 78,134,177     | 83,139,174     | 75,136,169     |
|           | 5 | 79,115,154,192 | 76,121,152,196 | 82,113,158,200 | 76,123,151,196 | 80,114,156,195 |
| 210088    | 2 | 122            | 128            | 125            | 126            | 125            |
| (321×481) | 3 | 102,147        | 101,144        | 108,147        | 105,148        | 103,147        |
|           | 4 | 99,132,177     | 96,132,175     | 107,140,181    | 96,135,185     | 98,134,176     |
|           | 5 | 89,130,169,207 | 85,130,168,204 | 95,133,169,204 | 86,136,166,207 | 87,132,168,205 |
| 21077     | 2 | 102            | 104            | 105            | 103            | 103            |
| (481×321) | 3 | 95,130         | 91,129         | 92,134         | 94,135         | 93,133         |
|           | 4 | 84,142,216     | 81,143,219     | 82,145,214     | 80,139,215     | 82,145,219     |
|           | 5 | 80,117,143,225 | 78,114,147,227 | 77,115,141,221 | 76,115,149,220 | 78,119,141,224 |
| 216081    | 2 | 108            | 106            | 105            | 112            | 110            |
| (481×321) | 3 | 106,136        | 108,135        | 108,138        | 104,144        | 108,134        |
|           | 4 | 82,112,149     | 80,111,147     | 90,117,150     | 85,118,150     | 85,113,149     |
|           | 5 | 69,109,143,184 | 75,110,140,186 | 68,111,147,191 | 68,111,144,186 | 72,112,142,185 |
| 223061    | 2 | 131            | 128            | 139            | 139            | 133            |
| (481×321) | 3 | 114,164        | 117,169        | 117,172        | 121,164        | 115,167        |
|           | 4 | 86,128,177     | 88,129,173     | 88,133,176     | 94,126,183     | 87,126,175     |
|           | 5 | 73,145,169,208 | 73,145,175,209 | 80,148,172,205 | 77,147,176,209 | 71,145,169,207 |
| 227092    | 2 | 115            | 115            | 119            | 112            | 115            |

|           |   |                |                |                 |                 |                |
|-----------|---|----------------|----------------|-----------------|-----------------|----------------|
| (321×481) | 3 | 105,164        | 106,163        | 103,171         | 113,169         | 107,164        |
|           | 4 | 95,143,186     | 93,141,188     | 92,143,184      | 97,140,185      | 95,146,186     |
|           | 5 | 88,134,195,216 | 84,139,199,213 | 85,137,194,220  | 92,136,195,216  | 89,136,194,217 |
| 253055    | 2 | 102            | 103            | 107             | 102             | 100            |
| (481×321) | 3 | 99,134         | 98,140         | 101,142         | 98,138          | 100,137        |
|           | 4 | 90,121,178     | 89,119,183     | 98,123,185      | 91,120,175      | 89,119,181     |
|           | 5 | 81,112,145,188 | 77,116,147,187 | 88,116,146,195  | 82,112,143,195  | 81,114,147,189 |
| 306005    | 2 | 95             | 96             | 96              | 92              | 93             |
| (481×321) | 3 | 95,158         | 91,164         | 98,158          | 92,155          | 96,160         |
|           | 4 | 91,141,181     | 89,138,185     | 91,140,184      | 99,138,182      | 92,143,182     |
|           | 5 | 82,121,192,205 | 78,126,192,211 | 84,119,198,210  | 79,129,194,212  | 84,123,195,205 |
| 3096      | 2 | 77             | 79             | 82              | 82              | 76             |
| (481×321) | 3 | 35,79          | 32,79          | 36,85           | 32,76           | 34,80          |
|           | 4 | 35,62,115      | 33,64,118      | 40,65,115       | 39,69,122       | 38,61,116      |
|           | 5 | 35,61,112,168  | 34,66,118,173  | 35,59,112,176   | 33,64,119,165   | 37,63,111,170  |
| 33039     | 2 | 115            | 116            | 117             | 119             | 118            |
| (321×481) | 3 | 107,171        | 108,169        | 104,173         | 112,173         | 108,170        |
|           | 4 | 102,158,195    | 98,154,201     | 106,161,194     | 102,158,192     | 105,159,194    |
|           | 5 | 95,141,164,208 | 95,138,164,210 | 102,145,163,214 | 95,140,170,205  | 98,142,163,210 |
| 376043    | 2 | 140            | 137            | 147             | 138             | 143            |
| (321×481) | 3 | 102,145        | 101,146        | 99,146          | 104,149         | 102,147        |
|           | 4 | 91,138,182     | 97,134,182     | 95,136,179      | 99,141,190      | 92,138,185     |
|           | 5 | 82,128,156,216 | 81,131,162,214 | 79,135,153,218  | 85,136,163,219  | 83,131,156,219 |
| 38082     | 2 | 95             | 91             | 103             | 98              | 98             |
| (481×321) | 3 | 91,154         | 94,151         | 95,152          | 99,153          | 91,155         |
|           | 4 | 80,138,173     | 81,134,175     | 81,140,173      | 85,142,181      | 78,136,174     |
|           | 5 | 69,130,158,181 | 65,131,157,182 | 74,133,161,178  | 70,137,163,183  | 70,132,157,182 |
| 41069     | 2 | 71             | 70             | 73              | 70              | 69             |
| (481×321) | 3 | 69,117         | 65,116         | 76,120          | 76,125          | 72,116         |
|           | 4 | 60,102,166     | 58,107,162     | 65,110,170      | 61,99,174       | 59,105,168     |
|           | 5 | 56,95,145,177  | 56,94,142,178  | 54,93,149,179   | 63,94,143,183   | 56,93,147,180  |
| 86068     | 2 | 132            | 134            | 132             | 133             | 130            |
| (481×321) | 3 | 110,175        | 116,175        | 117,176         | 114,174         | 108,178        |
|           | 4 | 104,136,194    | 100,137,191    | 101,143,191     | 101,141,191     | 102,135,192    |
|           | 5 | 94,123,156,210 | 92,123,153,215 | 95,126,153,215  | 101,120,156,216 | 94,122,156,209 |
| 97033     | 2 | 82             | 86             | 85              | 79              | 82             |
| (481×321) | 3 | 76,155         | 81,155         | 75,160          | 84,155          | 79,155         |
|           | 4 | 68,125,192     | 73,126,196     | 65,128,192      | 75,126,194      | 66,126,194     |
|           | 5 | 60,91,169,229  | 58,94,167,227  | 58,89,171,233   | 60,90,176,234   | 61,94,172,231  |
| 101087    | 2 | 125            | 121            | 132             | 128             | 128            |
| (321×481) | 3 | 110,150        | 109,155        | 109,150         | 109,158         | 109,151        |
|           | 4 | 80,127,159     | 81,127,161     | 79,125,162      | 85,132,158      | 82,125,162     |
|           | 5 | 78,107,139,194 | 77,103,136,200 | 84,105,140,192  | 77,108,140,193  | 78,108,139,195 |
| 102061    | 2 | 136            | 134            | 133             | 144             | 136            |

|           |   |                 |                |                 |                 |                 |
|-----------|---|-----------------|----------------|-----------------|-----------------|-----------------|
| (321×481) | 3 | 103,175         | 105,176        | 106,174         | 109,174         | 102,175         |
|           | 4 | 86,117,170      | 87,113,174     | 93,120,169      | 86,122,178      | 84,117,170      |
|           | 5 | 60,106,166,174  | 57,108,164,170 | 58,103,172,172  | 64,105,167,180  | 62,107,168,173  |
| 105025    | 2 | 131             | 134            | 131             | 130             | 133             |
| (481×321) | 3 | 119,151         | 116,153        | 124,155         | 121,153         | 120,152         |
|           | 4 | 101,137,171     | 102,135,171    | 100,144,173     | 105,136,172     | 103,139,172     |
|           | 5 | 73,107,156,174  | 75,103,154,174 | 77,110,163,171  | 74,110,157,181  | 71,105,157,177  |
| 106024    | 2 | 117             | 114            | 123             | 125             | 117             |
| (481×321) | 3 | 101,141         | 103,142        | 99,146          | 105,145         | 100,139         |
|           | 4 | 89,134,163      | 91,136,165     | 92,133,161      | 94,141,162      | 92,136,163      |
|           | 5 | 84,127,144,179  | 88,124,142,177 | 86,130,145,187  | 81,130,145,185  | 87,125,145,179  |
| 143090    | 2 | 112             | 108            | 112             | 120             | 113             |
| (481×321) | 3 | 101,147         | 103,146        | 98,150          | 101,153         | 101,148         |
|           | 4 | 76,122,162      | 75,118,167     | 81,124,167      | 77,124,161      | 76,120,160      |
|           | 5 | 71,112,158,189  | 70,117,164,194 | 73,111,163,186  | 74,116,158,194  | 72,110,160,191  |
| 159008    | 2 | 146             | 150            | 144             | 144             | 144             |
| (481×321) | 3 | 121,166         | 125,165        | 120,171         | 121,174         | 124,169         |
|           | 4 | 104,160,194     | 104,156,191    | 112,168,202     | 110,164,192     | 104,159,193     |
|           | 5 | 74,136,188,220  | 80,139,185,217 | 81,133,185,225  | 71,135,186,227  | 72,135,189,218  |
| 175043    | 2 | 114             | 114            | 114             | 119             | 115             |
| (481×321) | 3 | 114,141         | 112,141        | 112,142         | 118,138         | 112,141         |
|           | 4 | 104,138,184     | 105,140,189    | 101,142,192     | 103,145,185     | 107,139,187     |
|           | 5 | 95,130,171,218  | 91,130,175,220 | 103,129,171,225 | 101,129,170,223 | 93,128,171,220  |
| 197017    | 2 | 121             | 117            | 128             | 125             | 119             |
| (481×321) | 3 | 106,151         | 108,150        | 109,148         | 105,152         | 108,151         |
|           | 4 | 87,143,181      | 89,146,178     | 90,148,187      | 86,148,183      | 88,143,182      |
|           | 5 | 84,136,177,214  | 82,133,173,211 | 92,141,180,216  | 92,135,184,221  | 87,135,175,217  |
| 236037    | 2 | 127             | 125            | 132             | 129             | 129             |
| (481×321) | 3 | 119,154         | 116,150        | 116,161         | 123,156         | 122,156         |
|           | 4 | 104,136,171     | 106,141,170    | 105,142,175     | 112,142,173     | 103,137,173     |
|           | 5 | 89,121,165,218  | 89,118,162,223 | 97,128,173,226  | 89,123,166,222  | 90,122,167,219  |
| 241048    | 2 | 168             | 174            | 176             | 173             | 168             |
| (481×321) | 3 | 147,188         | 149,188        | 147,189         | 149,192         | 146,188         |
|           | 4 | 121,175,195     | 122,176,193    | 121,175,197     | 122,183,195     | 121,175,197     |
|           | 5 | 102,160,190,231 | 98,158,186,232 | 105,163,197,234 | 100,163,191,234 | 103,160,193,229 |
| 296059    | 2 | 108             | 108            | 107             | 113             | 107             |
| (481×321) | 3 | 91,147          | 92,148         | 91,152          | 94,149          | 92,147          |
|           | 4 | 84,158,186      | 86,157,188     | 84,164,191      | 92,165,193      | 83,158,186      |
|           | 5 | 80,123,177,204  | 83,119,178,208 | 84,121,174,207  | 81,125,184,209  | 79,123,177,203  |
| 299086    | 2 | 128             | 124            | 132             | 135             | 127             |
| (481×321) | 3 | 115,141         | 112,141        | 113,143         | 117,142         | 115,143         |
|           | 4 | 104,132,186     | 100,134,191    | 108,139,194     | 110,129,191     | 103,134,185     |
|           | 5 | 91,115,171,225  | 97,111,167,227 | 92,113,168,223  | 93,119,174,225  | 92,116,169,223  |
| 302008    | 2 | 107             | 108            | 107             | 110             | 108             |



|           |   |                 |                 |                 |                 |                 |
|-----------|---|-----------------|-----------------|-----------------|-----------------|-----------------|
| (321×481) | 3 | 104,188         | 103,190         | 105,185         | 104,187         | 104,190         |
|           | 4 | 91,175,210      | 96,172,207      | 95,182,208      | 99,174,213      | 93,173,211      |
|           | 5 | 76,161,194,221  | 76,157,195,225  | 84,160,193,227  | 78,161,194,221  | 79,161,193,222  |
| 304074    | 2 | 136             | 134             | 135             | 135             | 136             |
| (321×481) | 3 | 127,173         | 124,170         | 130,171         | 129,173         | 127,173         |
|           | 4 | 115,164,199     | 114,161,201     | 113,159,197     | 111,161,195     | 113,168,201     |
|           | 5 | 104,153,190,229 | 105,149,187,225 | 106,151,188,226 | 103,151,190,227 | 104,156,187,228 |
| 351093    | 2 | 140             | 146             | 145             | 145             | 140             |
| (481×321) | 3 | 115,177         | 116,181         | 123,179         | 123,185         | 116,178         |
|           | 4 | 106,169,199     | 106,174,203     | 108,166,200     | 110,171,198     | 105,167,197     |
|           | 5 | 99,156,190,236  | 99,161,186,239  | 101,154,195,234 | 104,153,196,242 | 97,159,191,235  |
| 361010    | 2 | 115             | 111             | 114             | 119             | 117             |
| (481×321) | 3 | 112,145         | 115,150         | 110,144         | 118,152         | 111,145         |
|           | 4 | 99,119,190      | 99,115,193      | 97,118,197      | 100,127,188     | 97,118,193      |
|           | 5 | 74,110,179,220  | 79,111,185,222  | 81,108,182,225  | 81,116,184,221  | 72,112,179,220  |
| 37073     | 2 | 86              | 84,             | 85              | 84              | 86              |
| (481×321) | 3 | 54,91           | 51,94           | 52,95           | 50,88           | 51,89           |
|           | 4 | 56,102,162,     | 54,103,165      | 52,106,159      | 53,99,159       | 57,104,165      |
|           | 5 | 51,86,147,201   | 49,84,144,199   | 53,84,150,197   | 51,89,149,204   | 53,83,145,200   |
| 385039    | 2 | 134             | 135             | 131             | 134             | 133             |
| (481×321) | 3 | 104,151         | 105,156         | 107,154         | 108,156         | 102,149         |
|           | 4 | 97,128,188      | 97,133,192      | 94,128,190      | 105,127,185     | 100,128,186     |
|           | 5 | 76,114,177,229  | 82,111,174,225  | 75,120,178,231  | 74,111,178,228  | 79,114,178,228  |
| 42012     | 2 | 89              | 90              | 94              | 93              | 92              |
| (321×481) | 3 | 76,141          | 72,146          | 74,148          | 81,147          | 74,140          |
|           | 4 | 71,108,175      | 69,107,171      | 77,105,183      | 74,112,180      | 69,109,177      |
|           | 5 | 63,117,175,212  | 65,118,180,213  | 61,116,176,215  | 71,115,174,209  | 62,119,175,214  |
| 55073     | 2 | 97              | 98              | 100             | 105             | 96              |
| (321×481) | 3 | 84,147          | 84,148          | 90,152          | 84,154          | 82,149          |
|           | 4 | 76,140,201      | 73,140,204      | 73,147,204      | 73,148,202      | 75,139,200      |
|           | 5 | 69,132,182,233  | 75,129,180,238  | 75,132,181,231  | 73,140,179,238  | 70,130,183,233  |
| 65033     | 2 | 114             | 118             | 119             | 118             | 112             |
| (481×321) | 3 | 97,162          | 101,166         | 105,169         | 105,162         | 98,163          |
|           | 4 | 82,145,203      | 81,142,201      | 89,147,204      | 81,152,209      | 81,147,202      |
|           | 5 | 73,136,203,227  | 75,141,201,228  | 74,135,207,225  | 72,133,200,230  | 75,139,204,227  |
| 66053     | 2 | 75              | 72,             | 73              | 73,             | 74              |
| (481×321) | 3 | 71,148          | 70,146          | 73,145          | 69,145          | 68,146          |
|           | 4 | 62,143,186      | 61,141,189      | 59,140,185,     | 60,147,188      | 60,142,189      |
|           | 5 | 60,112,177,205  | 63,115,179,201  | 61,116,174,208  | 58,114,180,201  | 61,115,179,201  |
| 69020     | 2 | 102             | 107             | 105             | 102             | 104             |
| (481×321) | 3 | 95,136          | 92,142          | 102,144         | 97,137          | 98,137          |
|           | 4 | 82,121,154      | 80,122,153      | 89,121,152      | 87,125,152      | 83,119,155      |
|           | 5 | 69,97,141,195   | 72,93,140,194   | 76,104,144,201  | 77,103,141,195  | 71,95,141,196   |
| 85048     | 2 | 123             | 128             | 121             | 124             | 123             |

|           |   |                |                |                |                |                |
|-----------|---|----------------|----------------|----------------|----------------|----------------|
| (481×321) | 3 | 110,166        | 116,165        | 109,166        | 114,171        | 108,164        |
|           | 4 | 93,156,173     | 95,154,175     | 97,157,177     | 99,155,174     | 95,159,172     |
|           | 5 | 86,145,171,208 | 88,147,176,210 | 94,146,176,205 | 83,150,170,211 | 87,148,170,207 |
| 87046     | 2 | 128            | 129            | 131            | 135            | 126            |
| (481×321) | 3 | 117,153        | 122,154        | 117,161        | 120,153        | 116,156        |
|           | 4 | 102,140,195    | 103,141,201    | 100,137,201    | 99,141,193     | 103,140,196    |
|           | 5 | 80,132,171,210 | 85,131,174,210 | 78,133,173,210 | 84,140,171,210 | 78,132,173,210 |

Table 2 the information entropy (IE) of different segmented images using various algorithm

| Image ID  | level | Our algorithm | BA   | MMSA | IBA  | OTSU |
|-----------|-------|---------------|------|------|------|------|
| 101085    | 2     | 2.27          | 2.23 | 2.23 | 2.23 | 2.27 |
| (321×481) | 3     | 3.49          | 3.47 | 3.46 | 3.48 | 3.49 |
|           | 4     | 5.14          | 5.08 | 5.07 | 5.08 | 5.11 |
|           | 5     | 5.39          | 5.34 | 5.32 | 5.34 | 5.32 |
| 119082    | 2     | 2.53          | 2.49 | 2.49 | 2.49 | 2.53 |
| (481×321) | 3     | 3.96          | 3.93 | 3.92 | 3.92 | 3.96 |
|           | 4     | 4.49          | 4.46 | 4.46 | 4.45 | 4.47 |
|           | 5     | 4.78          | 4.70 | 4.68 | 4.69 | 4.74 |
| 126007    | 2     | 2.07          | 2.05 | 2.04 | 2.05 | 2.05 |
| (481×321) | 3     | 3.50          | 3.46 | 3.45 | 3.45 | 3.49 |
|           | 4     | 4.28          | 4.24 | 4.24 | 4.24 | 4.23 |
|           | 5     | 4.74          | 4.66 | 4.66 | 4.64 | 4.67 |
| 156065    | 2     | 2.14          | 2.12 | 2.11 | 2.12 | 2.13 |
| (481×321) | 3     | 4.80          | 4.76 | 4.75 | 4.77 | 4.79 |
|           | 4     | 5.62          | 5.57 | 5.57 | 5.56 | 5.57 |
|           | 5     | 6.28          | 6.20 | 6.19 | 6.20 | 6.21 |
| 157055    | 2     | 1.99          | 1.96 | 1.96 | 1.95 | 1.98 |
| (481×321) | 3     | 3.22          | 3.19 | 3.19 | 3.19 | 3.20 |
|           | 4     | 3.83          | 3.77 | 3.77 | 3.77 | 3.79 |
|           | 5     | 4.17          | 4.12 | 4.10 | 4.10 | 4.13 |
| 16077     | 2     | 2.14          | 2.10 | 2.10 | 2.09 | 2.13 |
| (481×321) | 3     | 3.51          | 3.46 | 3.47 | 3.47 | 3.50 |
|           | 4     | 4.02          | 3.96 | 3.95 | 3.95 | 4.00 |
|           | 5     | 4.35          | 4.30 | 4.29 | 4.30 | 4.31 |
| 163085    | 2     | 2.04          | 2.03 | 2.02 | 2.02 | 2.03 |
| (481×321) | 3     | 3.60          | 3.57 | 3.58 | 3.57 | 3.60 |
|           | 4     | 4.89          | 4.85 | 4.85 | 4.85 | 4.84 |
|           | 5     | 6.00          | 5.93 | 5.94 | 5.91 | 5.93 |
| 167062    | 2     | 2.17          | 2.14 | 2.14 | 2.14 | 2.15 |
| (481×321) | 3     | 3.24          | 3.22 | 3.23 | 3.22 | 3.22 |
|           | 4     | 3.85          | 3.82 | 3.81 | 3.81 | 3.80 |
|           | 5     | 4.35          | 4.31 | 4.30 | 4.30 | 4.31 |
| 170057    | 2     | 2.02          | 2.00 | 1.99 | 1.99 | 2.01 |
| (481×321) | 3     | 3.86          | 3.83 | 3.82 | 3.82 | 3.85 |

|           |   |      |      |      |      |      |
|-----------|---|------|------|------|------|------|
|           | 4 | 4.61 | 4.58 | 4.58 | 4.57 | 4.59 |
|           | 5 | 4.99 | 4.92 | 4.91 | 4.90 | 4.93 |
| 175032    | 2 | 2.61 | 2.57 | 2.57 | 2.57 | 2.59 |
| (321×481) | 3 | 3.61 | 3.58 | 3.57 | 3.56 | 3.58 |
|           | 4 | 4.57 | 4.55 | 4.54 | 4.53 | 4.52 |
|           | 5 | 5.10 | 5.06 | 5.04 | 5.03 | 5.05 |
| 219090    | 2 | 2.80 | 2.78 | 2.79 | 2.79 | 2.78 |
| (481×321) | 3 | 4.18 | 4.15 | 4.14 | 4.14 | 4.16 |
|           | 4 | 5.50 | 5.45 | 5.44 | 5.45 | 5.46 |
|           | 5 | 5.94 | 5.86 | 5.84 | 5.84 | 5.89 |
| 220075    | 2 | 2.60 | 2.58 | 2.57 | 2.58 | 2.60 |
| (481×321) | 3 | 3.96 | 3.92 | 3.93 | 3.92 | 3.93 |
|           | 4 | 4.31 | 4.28 | 4.27 | 4.26 | 4.26 |
|           | 5 | 4.63 | 4.55 | 4.53 | 4.53 | 4.58 |
| 24077     | 2 | 2.87 | 2.85 | 2.84 | 2.85 | 2.87 |
| (481×321) | 3 | 3.91 | 3.88 | 3.88 | 2.88 | 2.89 |
|           | 4 | 4.64 | 4.59 | 4.58 | 4.58 | 4.61 |
|           | 5 | 5.12 | 5.04 | 5.05 | 5.05 | 5.09 |
| 295087    | 2 | 2.57 | 2.55 | 2.54 | 2.55 | 2.56 |
| (481×321) | 3 | 3.88 | 3.82 | 3.83 | 3.82 | 3.87 |
|           | 4 | 4.52 | 4.49 | 4.48 | 4.47 | 4.50 |
|           | 5 | 4.81 | 4.76 | 4.77 | 4.75 | 4.74 |
| 296007    | 2 | 2.71 | 2.69 | 2.68 | 2.69 | 2.70 |
| (481×321) | 3 | 4.52 | 4.50 | 4.51 | 4.51 | 4.49 |
|           | 4 | 6.17 | 6.13 | 6.12 | 6.11 | 6.15 |
|           | 5 | 6.59 | 6.53 | 6.51 | 6.52 | 6.53 |
| 300091    | 2 | 2.49 | 2.47 | 2.47 | 2.46 | 2.47 |
| (481×321) | 3 | 3.87 | 3.84 | 3.83 | 3.85 | 3.86 |
|           | 4 | 4.39 | 4.33 | 4.32 | 4.33 | 4.34 |
|           | 5 | 4.63 | 4.55 | 4.54 | 4.53 | 4.57 |
| 38092     | 2 | 2.31 | 2.28 | 2.27 | 2.26 | 2.29 |
| (481×321) | 3 | 3.72 | 3.68 | 3.66 | 3.65 | 3.69 |
|           | 4 | 4.28 | 4.23 | 4.22 | 4.22 | 4.24 |
|           | 5 | 4.50 | 4.46 | 4.43 | 4.44 | 4.45 |
| 42049     | 2 | 2.19 | 2.18 | 2.17 | 2.17 | 2.18 |
| (481×321) | 3 | 3.24 | 3.21 | 3.22 | 3.22 | 3.22 |
|           | 4 | 3.98 | 3.94 | 3.95 | 3.95 | 3.96 |
|           | 5 | 4.45 | 4.39 | 4.38 | 4.39 | 4.41 |
| 43074     | 2 | 2.77 | 2.76 | 2.76 | 2.76 | 2.77 |
| (481×321) | 3 | 4.26 | 4.22 | 4.21 | 4.19 | 4.25 |
|           | 4 | 4.95 | 4.92 | 4.90 | 4.89 | 4.91 |
|           | 5 | 5.28 | 5.23 | 5.21 | 5.21 | 5.24 |
| 45096     | 2 | 2.05 | 2.03 | 2.02 | 2.01 | 2.05 |
| (481×321) | 3 | 4.34 | 4.31 | 4.30 | 4.28 | 4.32 |

|           |   |      |      |      |      |      |
|-----------|---|------|------|------|------|------|
|           | 4 | 5.46 | 5.42 | 5.41 | 5.40 | 5.41 |
|           | 5 | 6.15 | 6.10 | 6.09 | 6.08 | 6.10 |
| 58060     | 2 | 2.11 | 2.08 | 2.10 | 2.10 | 2.10 |
| (481×321) | 3 | 3.58 | 3.56 | 3.55 | 3.55 | 3.58 |
|           | 4 | 4.39 | 4.33 | 4.32 | 4.33 | 4.34 |
|           | 5 | 4.96 | 4.92 | 4.93 | 4.89 | 4.89 |
| 76053     | 2 | 2.59 | 2.57 | 2.58 | 2.57 | 2.58 |
| (481×321) | 3 | 4.32 | 4.31 | 4.29 | 4.30 | 4.31 |
|           | 4 | 4.66 | 4.62 | 4.63 | 4.59 | 4.62 |
|           | 5 | 4.76 | 4.72 | 4.71 | 4.68 | 4.69 |
| 78004     | 2 | 2.76 | 2.75 | 2.75 | 2.74 | 2.74 |
| (321×481) | 3 | 4.46 | 4.44 | 4.45 | 4.45 | 4.44 |
|           | 4 | 5.46 | 5.42 | 5.43 | 5.39 | 5.43 |
|           | 5 | 6.18 | 6.12 | 6.12 | 6.09 | 6.14 |
| 86000     | 2 | 1.94 | 1.90 | 1.91 | 1.89 | 1.93 |
| (321×481) | 3 | 3.49 | 3.44 | 3.43 | 3.42 | 3.48 |
|           | 4 | 4.38 | 4.35 | 4.34 | 4.34 | 4.34 |
|           | 5 | 4.93 | 4.88 | 4.86 | 4.86 | 4.86 |
| 89072     | 2 | 3.02 | 3.01 | 3.01 | 3.01 | 3.02 |
| (321×481) | 3 | 4.36 | 4.33 | 4.34 | 4.33 | 4.34 |
|           | 4 | 5.23 | 5.20 | 5.21 | 5.21 | 5.23 |
|           | 5 | 5.98 | 5.91 | 5.92 | 5.92 | 5.93 |
| 103070    | 2 | 2.11 | 2.08 | 2.07 | 2.06 | 2.11 |
| (481×321) | 3 | 3.58 | 3.54 | 3.53 | 3.54 | 3.56 |
|           | 4 | 4.53 | 4.50 | 4.51 | 4.49 | 4.48 |
|           | 5 | 5.08 | 5.05 | 5.04 | 5.02 | 5.04 |
| 108082    | 2 | 2.01 | 1.97 | 1.96 | 1.96 | 1.99 |
| (481×321) | 3 | 3.66 | 3.63 | 3.61 | 3.61 | 3.64 |
|           | 4 | 4.39 | 4.34 | 4.34 | 4.34 | 4.34 |
|           | 5 | 4.92 | 4.86 | 4.85 | 4.86 | 4.87 |
| 109053    | 2 | 2.18 | 2.17 | 2.16 | 2.16 | 2.17 |
| (481×321) | 3 | 3.87 | 3.83 | 3.82 | 3.84 | 3.85 |
|           | 4 | 4.52 | 4.49 | 4.48 | 4.47 | 4.50 |
|           | 5 | 5.05 | 4.99 | 5.01 | 4.98 | 4.98 |
| 12084     | 2 | 2.04 | 2.02 | 2.03 | 2.01 | 2.04 |
| (481×321) | 3 | 4.48 | 4.45 | 4.46 | 4.44 | 4.48 |
|           | 4 | 5.56 | 5.51 | 5.52 | 5.49 | 5.53 |
|           | 5 | 6.26 | 6.22 | 6.19 | 6.18 | 6.22 |
| 130026    | 2 | 2.65 | 2.64 | 2.63 | 2.64 | 2.64 |
| (481×321) | 3 | 4.11 | 4.07 | 4.08 | 4.04 | 4.09 |
|           | 4 | 4.59 | 4.55 | 4.54 | 4.54 | 4.55 |
|           | 5 | 4.77 | 4.72 | 4.73 | 4.67 | 4.73 |
| 14037     | 2 | 2.34 | 2.31 | 2.32 | 2.31 | 2.34 |
| (481×321) | 3 | 4.06 | 4.04 | 4.02 | 4.02 | 4.03 |

|           |   |      |      |      |      |      |
|-----------|---|------|------|------|------|------|
|           | 4 | 4.54 | 4.51 | 4.52 | 4.51 | 4.51 |
|           | 5 | 4.76 | 4.72 | 4.73 | 4.68 | 4.70 |
| 147091    | 2 | 2.64 | 2.62 | 2.61 | 2.61 | 2.64 |
| (481×321) | 3 | 4.38 | 4.35 | 4.34 | 4.32 | 4.37 |
|           | 4 | 5.21 | 5.18 | 5.19 | 5.18 | 5.16 |
|           | 5 | 5.49 | 5.44 | 5.43 | 5.44 | 5.45 |
| 148089    | 2 | 2.87 | 2.86 | 2.85 | 2.85 | 2.87 |
| (481×321) | 3 | 4.94 | 4.88 | 4.89 | 4.89 | 4.91 |
|           | 4 | 5.50 | 5.47 | 5.46 | 5.47 | 5.47 |
|           | 5 | 6.27 | 6.22 | 6.23 | 6.19 | 6.20 |
| 167083    | 2 | 2.31 | 2.30 | 2.29 | 2.30 | 2.30 |
| (321×481) | 3 | 4.00 | 3.96 | 3.96 | 3.94 | 4.01 |
|           | 4 | 4.83 | 4.80 | 4.79 | 4.79 | 4.80 |
|           | 5 | 5.12 | 5.08 | 5.10 | 5.05 | 5.05 |
| 189080    | 2 | 2.40 | 2.37 | 2.36 | 2.35 | 2.40 |
| (321×481) | 3 | 4.57 | 4.53 | 4.55 | 4.54 | 4.54 |
|           | 4 | 4.91 | 4.87 | 4.88 | 4.84 | 4.86 |
|           | 5 | 5.15 | 5.10 | 5.09 | 5.08 | 5.11 |
| 229036    | 2 | 2.07 | 2.03 | 2.04 | 2.03 | 2.06 |
| (481×321) | 3 | 3.60 | 3.56 | 3.55 | 3.55 | 3.58 |
|           | 4 | 4.02 | 3.99 | 3.99 | 3.99 | 3.97 |
|           | 5 | 4.49 | 4.42 | 4.42 | 4.40 | 4.42 |
| 241004    | 2 | 2.48 | 2.44 | 2.45 | 2.44 | 2.46 |
| (481×321) | 3 | 5.05 | 4.99 | 5.01 | 4.99 | 5.04 |
|           | 4 | 5.84 | 5.78 | 5.77 | 5.78 | 5.79 |
|           | 5 | 6.26 | 6.20 | 6.18 | 6.19 | 6.20 |
| 253027    | 2 | 3.05 | 3.03 | 3.03 | 3.03 | 3.03 |
| (481×321) | 3 | 6.00 | 5.98 | 5.99 | 5.99 | 6.00 |
|           | 4 | 6.47 | 6.41 | 6.42 | 6.40 | 6.45 |
|           | 5 | 6.78 | 6.73 | 6.74 | 6.70 | 6.74 |
| 260058    | 2 | 2.91 | 2.89 | 2.89 | 2.89 | 2.90 |
| (481×321) | 3 | 4.61 | 4.57 | 4.55 | 4.54 | 4.61 |
|           | 4 | 5.51 | 5.48 | 5.49 | 5.48 | 5.48 |
|           | 5 | 5.62 | 5.59 | 5.57 | 5.52 | 5.55 |
| 271035    | 2 | 2.02 | 2.01 | 2.00 | 2.00 | 2.02 |
| (321×481) | 3 | 4.05 | 4.02 | 4.03 | 3.98 | 4.04 |
|           | 4 | 4.90 | 4.86 | 4.85 | 4.85 | 4.88 |
|           | 5 | 5.46 | 5.41 | 5.43 | 5.40 | 5.40 |
| 285079    | 2 | 2.78 | 2.76 | 2.75 | 2.74 | 2.78 |
| (321×481) | 3 | 4.06 | 4.04 | 4.05 | 4.04 | 4.04 |
|           | 4 | 5.25 | 5.19 | 5.21 | 5.19 | 5.22 |
|           | 5 | 5.48 | 5.41 | 5.42 | 5.39 | 5.44 |
| 291000    | 2 | 2.71 | 2.70 | 2.70 | 2.70 | 2.70 |
| (481×321) | 3 | 4.29 | 4.26 | 4.27 | 4.27 | 4.28 |

|           |   |      |      |      |      |      |
|-----------|---|------|------|------|------|------|
|           | 4 | 5.28 | 5.22 | 5.22 | 5.22 | 5.23 |
|           | 5 | 5.89 | 5.81 | 5.80 | 5.81 | 5.83 |
| 304034    | 2 | 2.02 | 1.99 | 1.98 | 1.99 | 2.01 |
| (481×321) | 3 | 4.89 | 4.85 | 4.84 | 4.84 | 4.89 |
|           | 4 | 5.31 | 5.27 | 5.27 | 5.27 | 5.26 |
|           | 5 | 5.71 | 5.63 | 5.61 | 5.61 | 5.67 |
| 41033     | 2 | 2.55 | 2.53 | 2.52 | 2.52 | 2.54 |
| (481×321) | 3 | 4.37 | 4.34 | 4.33 | 4.33 | 4.38 |
|           | 4 | 5.27 | 5.21 | 5.21 | 5.21 | 5.22 |
|           | 5 | 5.75 | 5.70 | 5.68 | 5.68 | 5.71 |
| 54082     | 2 | 2.35 | 2.34 | 2.34 | 2.34 | 2.35 |
| (321×481) | 3 | 4.23 | 4.21 | 4.21 | 4.22 | 4.23 |
|           | 4 | 5.52 | 5.48 | 5.49 | 5.49 | 5.51 |
|           | 5 | 6.31 | 6.25 | 6.24 | 6.25 | 6.28 |
| 62096     | 2 | 2.62 | 2.60 | 2.60 | 2.60 | 2.60 |
| (481×321) | 3 | 4.20 | 4.14 | 4.15 | 4.14 | 4.19 |
|           | 4 | 4.71 | 4.66 | 4.65 | 4.66 | 4.68 |
|           | 5 | 5.18 | 5.11 | 5.09 | 5.10 | 5.12 |
| 69015     | 2 | 2.08 | 2.07 | 2.06 | 2.07 | 2.07 |
| (321×481) | 3 | 4.82 | 4.78 | 4.79 | 4.79 | 4.81 |
|           | 4 | 5.91 | 5.87 | 5.87 | 5.87 | 5.89 |
|           | 5 | 6.20 | 6.14 | 6.13 | 6.13 | 6.13 |
| 69040     | 2 | 2.15 | 2.14 | 2.13 | 2.13 | 2.15 |
| (481×321) | 3 | 4.03 | 3.98 | 3.98 | 3.97 | 4.03 |
|           | 4 | 5.10 | 5.06 | 5.05 | 5.05 | 5.06 |
|           | 5 | 5.92 | 5.85 | 5.84 | 5.83 | 5.85 |
| 8023      | 2 | 2.68 | 2.64 | 2.63 | 2.64 | 2.66 |
| (481×321) | 3 | 4.71 | 4.68 | 4.69 | 4.68 | 4.69 |
|           | 4 | 5.29 | 5.24 | 5.24 | 5.24 | 5.25 |
|           | 5 | 5.51 | 5.43 | 5.42 | 5.43 | 5.46 |
| 86016     | 2 | 2.23 | 2.22 | 2.21 | 2.22 | 2.23 |
| (481×321) | 3 | 3.41 | 3.39 | 3.38 | 3.38 | 3.40 |
|           | 4 | 4.12 | 4.08 | 4.08 | 4.09 | 4.10 |
|           | 5 | 4.67 | 4.62 | 4.63 | 4.62 | 4.62 |
| 108005    | 2 | 2.89 | 2.86 | 2.86 | 2.85 | 2.88 |
| (481×321) | 3 | 5.29 | 5.23 | 5.24 | 5.24 | 5.27 |
|           | 4 | 6.16 | 6.11 | 6.10 | 6.10 | 6.12 |
|           | 5 | 6.49 | 6.43 | 6.41 | 6.42 | 6.42 |
| 108070    | 2 | 2.83 | 2.79 | 2.79 | 2.79 | 2.83 |
| (481×321) | 3 | 4.16 | 4.13 | 4.13 | 4.13 | 4.16 |
|           | 4 | 5.26 | 5.21 | 5.20 | 5.20 | 5.23 |
|           | 5 | 5.66 | 5.58 | 5.57 | 5.56 | 5.60 |
| 123074    | 2 | 2.07 | 2.03 | 2.02 | 2.02 | 2.06 |
| (481×321) | 3 | 4.01 | 3.97 | 3.96 | 3.96 | 3.98 |

|           |   |      |      |      |      |      |
|-----------|---|------|------|------|------|------|
|           | 4 | 4.78 | 4.72 | 4.71 | 4.72 | 4.74 |
|           | 5 | 5.28 | 5.22 | 5.21 | 5.22 | 5.22 |
| 134035    | 2 | 2.16 | 2.15 | 2.14 | 2.15 | 2.14 |
| (481×321) | 3 | 4.60 | 4.57 | 4.57 | 4.56 | 4.60 |
|           | 4 | 5.35 | 5.32 | 5.32 | 5.31 | 5.32 |
|           | 5 | 5.63 | 5.57 | 5.57 | 5.56 | 5.57 |
| 145086    | 2 | 2.00 | 1.99 | 1.98 | 1.99 | 1.99 |
| (481×321) | 3 | 4.29 | 4.25 | 4.26 | 4.24 | 4.30 |
|           | 4 | 4.82 | 4.79 | 4.79 | 4.78 | 4.80 |
|           | 5 | 5.09 | 5.03 | 5.01 | 5.03 | 5.03 |
| 148026    | 2 | 2.17 | 2.16 | 2.16 | 2.15 | 2.17 |
| (321×481) | 3 | 3.77 | 3.74 | 3.74 | 3.73 | 3.74 |
|           | 4 | 4.60 | 4.55 | 4.54 | 4.55 | 4.58 |
|           | 5 | 5.16 | 5.08 | 5.07 | 5.07 | 5.10 |
| 160068    | 2 | 2.31 | 2.30 | 2.31 | 2.30 | 2.30 |
| (481×321) | 3 | 3.83 | 3.81 | 3.80 | 3.81 | 3.80 |
|           | 4 | 4.76 | 4.71 | 4.70 | 4.71 | 4.72 |
|           | 5 | 5.56 | 5.49 | 5.51 | 5.49 | 5.50 |
| 182053    | 2 | 2.69 | 2.68 | 2.67 | 2.68 | 2.67 |
| (481×321) | 3 | 4.81 | 4.78 | 4.79 | 4.78 | 4.81 |
|           | 4 | 5.68 | 5.62 | 5.62 | 5.61 | 5.63 |
|           | 5 | 6.09 | 6.02 | 6.02 | 6.00 | 6.04 |
| 19021     | 2 | 2.18 | 2.17 | 2.16 | 2.16 | 2.16 |
| (481×321) | 3 | 3.90 | 3.85 | 3.84 | 3.84 | 3.90 |
|           | 4 | 4.41 | 4.35 | 4.34 | 4.35 | 4.38 |
|           | 5 | 4.72 | 4.66 | 4.66 | 4.64 | 4.68 |
| 196073    | 2 | 2.55 | 2.54 | 2.53 | 2.53 | 2.54 |
| (481×321) | 3 | 3.64 | 3.59 | 3.58 | 3.59 | 3.64 |
|           | 4 | 4.36 | 4.32 | 4.32 | 4.32 | 4.33 |
|           | 5 | 4.64 | 4.59 | 4.57 | 4.58 | 4.59 |
| 208001    | 2 | 2.14 | 2.13 | 2.13 | 2.13 | 2.14 |
| (321×481) | 3 | 3.97 | 3.91 | 3.90 | 3.91 | 3.94 |
|           | 4 | 4.55 | 4.50 | 4.49 | 4.50 | 4.52 |
|           | 5 | 4.86 | 4.79 | 4.77 | 4.78 | 4.79 |
| 210088    | 2 | 2.30 | 2.29 | 2.29 | 2.28 | 2.29 |
| (321×481) | 3 | 3.73 | 3.70 | 3.71 | 3.69 | 3.72 |
|           | 4 | 4.47 | 4.44 | 4.44 | 4.43 | 4.42 |
|           | 5 | 4.80 | 4.75 | 4.74 | 4.74 | 4.75 |
| 21077     | 2 | 2.76 | 2.75 | 2.75 | 2.75 | 2.76 |
| (481×321) | 3 | 3.63 | 3.61 | 3.62 | 3.62 | 3.62 |
|           | 4 | 4.32 | 4.28 | 4.29 | 4.28 | 4.30 |
|           | 5 | 4.86 | 4.81 | 4.80 | 4.80 | 4.79 |
| 216081    | 2 | 2.86 | 2.85 | 2.85 | 2.84 | 2.86 |
| (481×321) | 3 | 4.37 | 4.32 | 4.31 | 4.31 | 4.36 |

|           |   |      |      |      |      |      |
|-----------|---|------|------|------|------|------|
|           | 4 | 5.24 | 5.21 | 5.20 | 5.21 | 5.20 |
|           | 5 | 5.70 | 5.64 | 5.62 | 5.62 | 5.64 |
| 223061    | 2 | 2.01 | 2.00 | 1.99 | 1.99 | 2.00 |
| (481×321) | 3 | 3.59 | 3.55 | 3.56 | 3.54 | 3.58 |
|           | 4 | 4.73 | 4.70 | 4.69 | 4.69 | 4.70 |
|           | 5 | 5.32 | 5.27 | 5.26 | 5.25 | 5.25 |
| 227092    | 2 | 2.68 | 2.67 | 2.66 | 2.66 | 2.68 |
| (321×481) | 3 | 4.36 | 4.31 | 4.32 | 4.30 | 4.34 |
|           | 4 | 4.62 | 4.57 | 4.56 | 4.57 | 4.58 |
|           | 5 | 5.00 | 4.92 | 4.92 | 4.91 | 4.94 |
| 253055    | 2 | 2.06 | 2.05 | 2.05 | 2.04 | 2.04 |
| (481×321) | 3 | 4.27 | 4.22 | 4.22 | 4.21 | 4.26 |
|           | 4 | 5.33 | 5.28 | 5.28 | 5.27 | 5.30 |
|           | 5 | 5.73 | 5.67 | 5.66 | 5.65 | 5.67 |
| 306005    | 2 | 2.84 | 2.82 | 2.82 | 2.81 | 2.84 |
| (481×321) | 3 | 4.61 | 4.57 | 4.58 | 4.58 | 4.61 |
|           | 4 | 5.26 | 5.21 | 5.20 | 5.21 | 5.22 |
|           | 5 | 5.32 | 5.24 | 5.22 | 5.24 | 5.28 |
| 3096      | 2 | 2.55 | 2.52 | 2.51 | 2.51 | 2.54 |
| (481×321) | 3 | 4.57 | 4.52 | 4.53 | 4.52 | 4.56 |
|           | 4 | 5.27 | 5.24 | 5.23 | 5.24 | 5.24 |
|           | 5 | 5.77 | 5.70 | 5.70 | 5.68 | 5.72 |
| 33039     | 2 | 2.47 | 2.43 | 2.43 | 2.42 | 2.46 |
| (321×481) | 3 | 4.33 | 4.31 | 4.31 | 4.31 | 4.32 |
|           | 4 | 4.95 | 4.92 | 4.92 | 4.91 | 4.92 |
|           | 5 | 5.29 | 5.23 | 5.21 | 5.22 | 5.25 |
| 376043    | 2 | 2.29 | 2.27 | 2.26 | 2.26 | 2.29 |
| (321×481) | 3 | 3.73 | 3.67 | 3.68 | 3.67 | 3.72 |
|           | 4 | 4.31 | 4.28 | 4.28 | 4.27 | 4.29 |
|           | 5 | 4.62 | 4.54 | 4.52 | 4.54 | 4.55 |
| 38082     | 2 | 2.35 | 2.31 | 2.31 | 2.30 | 2.35 |
| (481×321) | 3 | 4.28 | 4.24 | 4.23 | 4.24 | 4.28 |
|           | 4 | 5.44 | 5.38 | 5.38 | 5.37 | 5.41 |
|           | 5 | 5.94 | 5.88 | 5.86 | 5.87 | 5.89 |
| 41069     | 2 | 2.34 | 2.33 | 2.33 | 2.32 | 2.34 |
| (481×321) | 3 | 4.48 | 4.45 | 4.44 | 4.45 | 4.46 |
|           | 4 | 4.96 | 4.92 | 4.92 | 4.92 | 4.93 |
|           | 5 | 5.20 | 5.13 | 5.12 | 5.11 | 5.15 |
| 86068     | 2 | 2.41 | 2.40 | 2.40 | 2.40 | 2.40 |
| (481×321) | 3 | 3.82 | 3.76 | 3.75 | 3.77 | 3.81 |
|           | 4 | 4.48 | 4.45 | 4.44 | 4.45 | 4.45 |
|           | 5 | 4.81 | 4.74 | 4.72 | 4.72 | 4.74 |
| 97033     | 2 | 2.59 | 2.58 | 2.57 | 2.58 | 2.58 |
| (481×321) | 3 | 4.27 | 4.24 | 4.23 | 4.24 | 4.26 |



|           |   |      |      |      |      |      |
|-----------|---|------|------|------|------|------|
|           | 4 | 5.14 | 5.09 | 5.09 | 5.08 | 5.09 |
|           | 5 | 5.30 | 5.25 | 5.23 | 5.24 | 5.23 |
| 101087    | 2 | 2.13 | 2.12 | 2.11 | 2.11 | 2.13 |
| (321×481) | 3 | 3.69 | 3.64 | 3.65 | 3.63 | 3.69 |
|           | 4 | 4.53 | 4.49 | 4.50 | 4.49 | 4.49 |
|           | 5 | 4.84 | 4.78 | 4.77 | 4.76 | 4.80 |
| 102061    | 2 | 2.10 | 2.09 | 2.10 | 2.05 | 2.08 |
| (321×481) | 3 | 4.44 | 4.42 | 4.41 | 4.43 | 4.41 |
|           | 4 | 4.90 | 4.85 | 4.86 | 4.85 | 4.88 |
|           | 5 | 5.15 | 5.09 | 5.11 | 5.07 | 5.08 |
| 105025    | 2 | 2.84 | 2.80 | 2.81 | 2.79 | 2.82 |
| (481×321) | 3 | 4.24 | 4.18 | 4.20 | 4.18 | 4.22 |
|           | 4 | 4.64 | 4.58 | 4.59 | 4.58 | 4.62 |
|           | 5 | 4.91 | 4.86 | 4.88 | 4.85 | 4.87 |
| 106024    | 2 | 2.18 | 2.16 | 2.17 | 2.16 | 2.16 |
| (481×321) | 3 | 4.28 | 4.22 | 4.22 | 4.21 | 4.26 |
|           | 4 | 5.20 | 5.15 | 5.16 | 5.15 | 5.18 |
|           | 5 | 5.57 | 5.50 | 5.49 | 5.49 | 5.50 |
| 143090    | 2 | 2.23 | 2.22 | 2.21 | 2.20 | 2.23 |
| (481×321) | 3 | 4.01 | 3.97 | 3.98 | 3.98 | 4.02 |
|           | 4 | 4.91 | 4.86 | 4.85 | 4.85 | 4.86 |
|           | 5 | 5.29 | 5.24 | 5.23 | 5.22 | 5.25 |
| 159008    | 2 | 2.68 | 2.67 | 2.67 | 2.65 | 2.66 |
| (481×321) | 3 | 4.45 | 4.39 | 4.40 | 4.39 | 4.42 |
|           | 4 | 5.07 | 5.03 | 5.04 | 5.03 | 5.02 |
|           | 5 | 5.44 | 5.39 | 5.38 | 5.38 | 5.37 |
| 175043    | 2 | 2.54 | 2.53 | 2.53 | 2.51 | 2.52 |
| (481×321) | 3 | 4.32 | 4.27 | 4.26 | 4.27 | 4.31 |
|           | 4 | 4.94 | 4.91 | 4.91 | 4.91 | 4.89 |
|           | 5 | 5.28 | 5.22 | 5.24 | 5.21 | 5.22 |
| 197017    | 2 | 2.87 | 2.86 | 2.86 | 2.82 | 2.85 |
| (481×321) | 3 | 4.67 | 4.61 | 4.63 | 4.61 | 4.65 |
|           | 4 | 5.54 | 5.50 | 5.52 | 5.49 | 5.49 |
|           | 5 | 6.10 | 6.04 | 6.06 | 6.02 | 6.05 |
| 236037    | 2 | 2.29 | 2.28 | 2.27 | 2.28 | 2.28 |
| (481×321) | 3 | 4.14 | 4.10 | 4.09 | 4.11 | 4.14 |
|           | 4 | 4.93 | 4.87 | 4.89 | 4.87 | 4.89 |
|           | 5 | 5.36 | 5.32 | 5.33 | 5.26 | 5.31 |
| 241048    | 2 | 2.15 | 2.14 | 2.14 | 2.14 | 2.15 |
| (481×321) | 3 | 3.20 | 3.18 | 3.17 | 3.18 | 3.17 |
|           | 4 | 4.18 | 4.13 | 4.14 | 4.13 | 4.14 |
|           | 5 | 4.61 | 4.56 | 4.59 | 4.56 | 4.54 |
| 296059    | 2 | 2.67 | 2.66 | 2.67 | 2.63 | 2.65 |
| (481×321) | 3 | 4.53 | 4.48 | 4.49 | 4.49 | 4.52 |

|           |   |      |      |      |      |      |
|-----------|---|------|------|------|------|------|
|           | 4 | 5.11 | 5.06 | 5.07 | 5.05 | 5.08 |
|           | 5 | 5.48 | 5.42 | 5.43 | 5.42 | 5.41 |
| 299086    | 2 | 2.41 | 2.39 | 2.40 | 2.37 | 2.39 |
| (481×321) | 3 | 4.50 | 4.44 | 4.45 | 4.43 | 4.49 |
|           | 4 | 5.29 | 5.23 | 5.24 | 5.23 | 5.24 |
|           | 5 | 5.67 | 5.62 | 5.63 | 5.57 | 5.60 |
| 302008    | 2 | 2.47 | 2.46 | 2.46 | 2.42 | 2.45 |
| (321×481) | 3 | 4.87 | 4.84 | 4.83 | 4.83 | 4.84 |
|           | 4 | 5.25 | 5.21 | 5.23 | 5.21 | 5.20 |
|           | 5 | 5.47 | 5.42 | 5.43 | 5.40 | 5.43 |
| 304074    | 2 | 3.13 | 3.12 | 3.10 | 3.14 | 3.13 |
| (321×481) | 3 | 4.09 | 4.07 | 4.06 | 4.08 | 4.09 |
|           | 4 | 4.76 | 4.70 | 4.71 | 4.73 | 4.73 |
|           | 5 | 5.21 | 5.16 | 5.15 | 5.15 | 5.18 |
| 351093    | 2 | 2.39 | 2.37 | 2.36 | 2.36 | 2.38 |
| (481×321) | 3 | 4.57 | 4.52 | 4.51 | 4.51 | 4.56 |
|           | 4 | 5.58 | 5.54 | 5.53 | 5.51 | 5.55 |
|           | 5 | 6.12 | 6.07 | 6.08 | 6.02 | 6.07 |
| 361010    | 2 | 2.50 | 2.47 | 2.47 | 2.46 | 2.48 |
| (481×321) | 3 | 4.96 | 4.91 | 4.90 | 4.90 | 4.95 |
|           | 4 | 5.72 | 5.68 | 5.68 | 5.68 | 5.67 |
|           | 5 | 6.15 | 6.09 | 6.07 | 6.09 | 6.10 |
| 37073     | 2 | 2.64 | 2.62 | 2.63 | 2.59 | 2.64 |
| (481×321) | 3 | 4.30 | 4.26 | 4.25 | 4.26 | 4.28 |
|           | 4 | 4.95 | 4.93 | 4.92 | 4.91 | 4.90 |
|           | 5 | 5.28 | 5.25 | 5.23 | 5.18 | 5.24 |
| 385039    | 2 | 2.61 | 2.59 | 2.58 | 2.58 | 2.60 |
| (481×321) | 3 | 4.38 | 4.35 | 4.36 | 4.34 | 4.36 |
|           | 4 | 5.20 | 5.17 | 5.16 | 5.17 | 5.15 |
|           | 5 | 5.50 | 5.43 | 5.42 | 5.41 | 5.43 |
| 42012     | 2 | 2.27 | 2.26 | 2.25 | 2.22 | 2.25 |
| (321×481) | 3 | 4.00 | 3.98 | 3.99 | 3.97 | 3.97 |
|           | 4 | 4.62 | 4.56 | 4.56 | 4.56 | 4.58 |
|           | 5 | 5.07 | 5.00 | 4.99 | 4.98 | 5.01 |
| 55073     | 2 | 2.20 | 2.17 | 2.16 | 2.16 | 2.18 |
| (321×481) | 3 | 3.67 | 3.64 | 3.65 | 3.64 | 3.67 |
|           | 4 | 4.46 | 4.42 | 4.42 | 4.41 | 4.41 |
|           | 5 | 4.75 | 4.69 | 4.67 | 4.69 | 4.71 |
| 65033     | 2 | 2.02 | 1.99 | 1.99 | 1.99 | 2.02 |
| (481×321) | 3 | 3.98 | 3.94 | 3.94 | 3.93 | 3.95 |
|           | 4 | 4.55 | 4.49 | 4.48 | 4.48 | 4.52 |
|           | 5 | 4.79 | 4.73 | 4.72 | 4.71 | 4.75 |
| 66053     | 2 | 3.16 | 3.15 | 3.14 | 3.15 | 3.15 |
| (481×321) | 3 | 4.56 | 4.51 | 4.51 | 4.52 | 4.51 |

|           |   |      |      |      |      |      |
|-----------|---|------|------|------|------|------|
|           | 4 | 5.43 | 5.38 | 5.37 | 5.39 | 5.39 |
|           | 5 | 6.19 | 6.12 | 6.13 | 6.12 | 6.14 |
| 69020     | 2 | 2.52 | 2.51 | 2.50 | 2.51 | 2.50 |
| (481×321) | 3 | 4.61 | 4.58 | 4.57 | 4.59 | 4.60 |
|           | 4 | 5.16 | 5.12 | 5.11 | 5.12 | 5.12 |
|           | 5 | 5.60 | 5.55 | 5.55 | 5.55 | 5.53 |
| 85048     | 2 | 2.21 | 2.20 | 2.20 | 2.20 | 2.20 |
| (481×321) | 3 | 4.47 | 4.43 | 4.44 | 4.44 | 4.45 |
|           | 4 | 5.28 | 5.23 | 5.22 | 5.23 | 5.23 |
|           | 5 | 5.46 | 5.40 | 5.41 | 5.40 | 5.42 |
| 87046     | 2 | 2.10 | 2.09 | 2.08 | 2.09 | 2.10 |
| (481×321) | 3 | 3.77 | 3.73 | 3.71 | 3.72 | 3.74 |
|           | 4 | 4.58 | 4.54 | 4.54 | 4.54 | 4.54 |
|           | 5 | 5.18 | 5.13 | 5.12 | 5.13 | 5.14 |

Table 3 Root Mean Squared Error (RMSE) of different segmented images using various algorithm

| Image ID  | level | Our algorithm | BA    | MMSA  | IBA   | OTSU  |
|-----------|-------|---------------|-------|-------|-------|-------|
| 101085    | 2     | 17.92         | 17.93 | 17.95 | 17.93 | 17.93 |
| (321×481) | 3     | 16.80         | 16.89 | 16.94 | 16.84 | 16.84 |
|           | 4     | 16.27         | 16.42 | 16.49 | 16.29 | 16.29 |
|           | 5     | 15.85         | 15.94 | 15.97 | 15.90 | 15.90 |
| 119082    | 2     | 17.56         | 17.57 | 17.58 | 17.59 | 17.59 |
| (481×321) | 3     | 16.70         | 16.77 | 16.82 | 16.72 | 16.72 |
|           | 4     | 16.19         | 16.29 | 16.31 | 16.23 | 16.23 |
|           | 5     | 15.73         | 15.86 | 15.90 | 15.77 | 15.77 |
| 126007    | 2     | 17.67         | 17.75 | 17.78 | 17.68 | 17.68 |
| (481×321) | 3     | 16.86         | 16.92 | 16.97 | 16.91 | 16.91 |
|           | 4     | 16.22         | 16.36 | 16.41 | 16.24 | 16.24 |
|           | 5     | 15.78         | 15.85 | 15.87 | 15.81 | 15.81 |
| 156065    | 2     | 18.01         | 18.02 | 18.05 | 18.04 | 18.04 |
| (481×321) | 3     | 17.16         | 17.23 | 17.28 | 17.20 | 17.20 |
|           | 4     | 16.48         | 16.64 | 16.71 | 16.55 | 16.55 |
|           | 5     | 16.17         | 16.31 | 16.34 | 16.24 | 16.24 |
| 157055    | 2     | 18.74         | 18.81 | 18.83 | 18.77 | 18.77 |
| (481×321) | 3     | 18.28         | 18.39 | 18.44 | 18.32 | 18.32 |
|           | 4     | 17.82         | 17.97 | 18.01 | 17.89 | 17.89 |
|           | 5     | 17.62         | 17.80 | 17.83 | 17.65 | 17.65 |
| 16077     | 2     | 18.01         | 18.08 | 18.11 | 18.03 | 18.03 |
| (481×321) | 3     | 17.14         | 17.22 | 17.24 | 17.16 | 17.16 |
|           | 4     | 16.49         | 16.61 | 16.63 | 16.56 | 16.56 |
|           | 5     | 16.07         | 16.16 | 16.20 | 16.11 | 16.11 |
| 163085    | 2     | 18.09         | 18.12 | 18.13 | 18.10 | 18.10 |
| (481×321) | 3     | 17.32         | 17.38 | 17.44 | 17.35 | 17.35 |
|           | 4     | 16.87         | 16.93 | 16.96 | 16.91 | 16.91 |

|           |   |       |       |       |       |       |
|-----------|---|-------|-------|-------|-------|-------|
|           | 5 | 16.64 | 16.71 | 16.77 | 16.71 | 16.71 |
| 167062    | 2 | 16.24 | 16.26 | 16.29 | 16.27 | 16.27 |
| (481×321) | 3 | 15.44 | 15.47 | 15.49 | 15.48 | 15.48 |
|           | 4 | 15.23 | 15.32 | 15.37 | 15.26 | 15.26 |
|           | 5 | 15.03 | 15.17 | 15.25 | 15.05 | 15.05 |
| 170057    | 2 | 18.70 | 18.74 | 18.75 | 18.73 | 18.73 |
| (481×321) | 3 | 17.97 | 18.04 | 18.09 | 18.01 | 18.01 |
|           | 4 | 17.33 | 17.46 | 17.50 | 17.38 | 17.38 |
|           | 5 | 17.00 | 17.08 | 17.15 | 17.08 | 17.08 |
| 175032    | 2 | 17.56 | 17.58 | 17.60 | 17.58 | 17.58 |
| (321×481) | 3 | 17.16 | 17.28 | 17.32 | 17.20 | 17.20 |
|           | 4 | 16.82 | 16.92 | 16.94 | 16.88 | 16.88 |
|           | 5 | 16.68 | 16.75 | 16.80 | 16.75 | 16.75 |
| 219090    | 2 | 18.50 | 18.58 | 18.60 | 18.53 | 18.53 |
| (481×321) | 3 | 17.97 | 18.01 | 18.07 | 18.03 | 18.03 |
|           | 4 | 17.53 | 17.68 | 17.72 | 17.57 | 17.57 |
|           | 5 | 17.32 | 17.41 | 17.44 | 17.40 | 17.40 |
| 220075    | 2 | 18.59 | 18.60 | 18.61 | 18.60 | 18.60 |
| (481×321) | 3 | 17.83 | 17.91 | 17.93 | 17.88 | 17.88 |
|           | 4 | 17.40 | 17.51 | 17.56 | 17.43 | 17.43 |
|           | 5 | 17.26 | 17.34 | 17.40 | 17.30 | 17.30 |
| 24077     | 2 | 17.21 | 17.24 | 17.25 | 17.21 | 17.22 |
| (481×321) | 3 | 16.92 | 17.05 | 17.10 | 16.96 | 16.95 |
|           | 4 | 16.82 | 16.94 | 16.99 | 16.87 | 16.85 |
|           | 5 | 16.56 | 16.63 | 16.79 | 16.66 | 16.63 |
| 295087    | 2 | 18.73 | 18.75 | 18.76 | 18.75 | 18.75 |
| (481×321) | 3 | 18.02 | 18.10 | 18.12 | 18.08 | 18.08 |
|           | 4 | 17.52 | 17.60 | 17.67 | 17.54 | 17.54 |
|           | 5 | 17.40 | 17.52 | 17.59 | 17.47 | 17.47 |
| 296007    | 2 | 18.08 | 18.09 | 18.12 | 18.11 | 18.11 |
| (481×321) | 3 | 17.69 | 17.75 | 17.77 | 17.74 | 17.74 |
|           | 4 | 17.40 | 17.53 | 17.58 | 17.44 | 17.44 |
|           | 5 | 17.29 | 17.43 | 17.50 | 17.33 | 17.33 |
| 300091    | 2 | 17.84 | 17.90 | 17.92 | 17.87 | 17.87 |
| (481×321) | 3 | 17.18 | 17.30 | 17.36 | 17.22 | 17.22 |
|           | 4 | 16.80 | 16.87 | 16.92 | 16.86 | 16.86 |
|           | 5 | 16.54 | 16.67 | 16.73 | 16.58 | 16.58 |
| 38092     | 2 | 18.03 | 18.11 | 18.12 | 18.06 | 18.06 |
| (481×321) | 3 | 17.53 | 17.62 | 17.66 | 17.58 | 17.58 |
|           | 4 | 17.11 | 17.20 | 17.23 | 17.16 | 17.16 |
|           | 5 | 16.82 | 17.98 | 18.00 | 16.88 | 16.88 |
| 42049     | 2 | 18.03 | 18.09 | 18.13 | 18.11 | 18.05 |
| (481×321) | 3 | 17.72 | 17.79 | 17.82 | 17.76 | 17.73 |
|           | 4 | 16.72 | 16.71 | 16.72 | 16.73 | 16.73 |

|           |   |       |       |       |       |       |
|-----------|---|-------|-------|-------|-------|-------|
|           | 5 | 15.90 | 15.92 | 15.92 | 15.93 | 15.92 |
| 43074     | 2 | 18.54 | 18.57 | 18.59 | 18.56 | 18.56 |
| (481×321) | 3 | 17.86 | 17.94 | 18.00 | 17.91 | 17.91 |
|           | 4 | 17.41 | 17.52 | 17.55 | 17.46 | 17.46 |
|           | 5 | 17.18 | 17.34 | 17.40 | 17.22 | 17.22 |
| 45096     | 2 | 18.30 | 18.36 | 18.37 | 18.31 | 18.31 |
| (481×321) | 3 | 17.38 | 17.50 | 17.54 | 17.43 | 17.43 |
|           | 4 | 16.86 | 16.93 | 17.00 | 16.90 | 16.90 |
|           | 5 | 16.50 | 16.58 | 16.60 | 16.55 | 16.55 |
| 58060     | 2 | 18.39 | 18.45 | 18.47 | 18.40 | 18.40 |
| (481×321) | 3 | 17.31 | 17.35 | 17.39 | 17.35 | 17.35 |
|           | 4 | 16.89 | 17.03 | 17.09 | 16.94 | 16.94 |
|           | 5 | 16.51 | 16.65 | 16.67 | 16.58 | 16.58 |
| 76053     | 2 | 17.60 | 17.66 | 17.67 | 17.62 | 17.62 |
| (481×321) | 3 | 16.44 | 16.56 | 16.58 | 16.49 | 16.49 |
|           | 4 | 16.10 | 16.16 | 16.20 | 16.12 | 16.12 |
|           | 5 | 15.90 | 16.00 | 16.08 | 15.98 | 15.98 |
| 78004     | 2 | 18.42 | 18.45 | 18.47 | 18.45 | 18.45 |
| (321×481) | 3 | 17.48 | 17.59 | 17.61 | 17.51 | 17.51 |
|           | 4 | 16.88 | 16.92 | 16.96 | 16.95 | 16.95 |
|           | 5 | 16.45 | 16.61 | 16.68 | 16.48 | 16.48 |
| 86000     | 2 | 18.38 | 18.46 | 18.48 | 18.39 | 18.39 |
| (321×481) | 3 | 17.98 | 18.07 | 18.11 | 18.02 | 18.02 |
|           | 4 | 17.68 | 17.84 | 17.87 | 17.74 | 17.74 |
|           | 5 | 17.41 | 17.54 | 17.59 | 17.49 | 17.49 |
| 89072     | 2 | 18.10 | 18.11 | 18.12 | 18.10 | 18.11 |
| (321×481) | 3 | 18.02 | 18.00 | 18.08 | 18.01 | 18.03 |
|           | 4 | 17.34 | 17.38 | 17.43 | 17.40 | 17.34 |
|           | 5 | 16.96 | 17.12 | 17.19 | 17.17 | 17.05 |
| 103070    | 2 | 18.11 | 18.19 | 18.20 | 18.13 | 18.13 |
| (481×321) | 3 | 17.72 | 17.79 | 17.81 | 17.74 | 17.74 |
|           | 4 | 17.26 | 17.31 | 17.36 | 17.28 | 17.28 |
|           | 5 | 17.13 | 17.24 | 17.31 | 17.16 | 17.16 |
| 108082    | 2 | 18.69 | 18.72 | 18.74 | 18.71 | 18.71 |
| (481×321) | 3 | 17.35 | 17.45 | 17.49 | 17.38 | 17.38 |
|           | 4 | 16.88 | 17.03 | 17.09 | 16.92 | 16.92 |
|           | 5 | 16.36 | 16.46 | 16.54 | 16.40 | 16.40 |
| 109053    | 2 | 17.96 | 17.99 | 18.01 | 17.97 | 17.97 |
| (481×321) | 3 | 16.63 | 16.73 | 16.79 | 16.65 | 16.65 |
|           | 4 | 15.91 | 15.99 | 16.03 | 15.96 | 15.96 |
|           | 5 | 15.65 | 15.74 | 15.81 | 15.69 | 15.69 |
| 12084     | 2 | 18.21 | 18.24 | 18.26 | 18.23 | 18.23 |
| (481×321) | 3 | 17.42 | 17.53 | 17.59 | 17.48 | 17.48 |
|           | 4 | 16.90 | 16.96 | 16.99 | 16.92 | 16.92 |

|           |   |       |       |       |       |       |
|-----------|---|-------|-------|-------|-------|-------|
|           | 5 | 16.35 | 16.51 | 16.58 | 16.38 | 16.38 |
| 130026    | 2 | 18.20 | 18.27 | 18.28 | 18.23 | 18.23 |
| (481×321) | 3 | 17.61 | 17.67 | 17.69 | 17.67 | 17.67 |
|           | 4 | 17.48 | 17.60 | 17.66 | 17.52 | 17.52 |
|           | 5 | 17.34 | 17.47 | 17.51 | 17.38 | 17.38 |
| 14037     | 2 | 18.42 | 18.50 | 18.52 | 18.43 | 18.43 |
| (481×321) | 3 | 17.53 | 17.61 | 17.67 | 17.55 | 17.55 |
|           | 4 | 17.22 | 17.35 | 17.42 | 17.27 | 17.27 |
|           | 5 | 17.92 | 18.04 | 18.07 | 18.00 | 18.00 |
| 147091    | 2 | 18.10 | 18.16 | 18.19 | 18.13 | 18.13 |
| (481×321) | 3 | 17.51 | 17.61 | 17.67 | 17.53 | 17.53 |
|           | 4 | 17.16 | 17.28 | 17.30 | 17.20 | 17.20 |
|           | 5 | 16.90 | 17.04 | 17.12 | 16.93 | 16.93 |
| 148089    | 2 | 18.44 | 18.45 | 18.48 | 18.47 | 18.47 |
| (481×321) | 3 | 18.18 | 18.22 | 18.24 | 18.21 | 18.21 |
|           | 4 | 17.85 | 17.95 | 17.97 | 17.92 | 17.92 |
|           | 5 | 17.75 | 17.85 | 17.90 | 17.81 | 17.81 |
| 167083    | 2 | 17.90 | 17.94 | 17.96 | 17.93 | 17.93 |
| (321×481) | 3 | 17.44 | 17.49 | 17.51 | 17.49 | 17.49 |
|           | 4 | 17.36 | 17.52 | 17.56 | 17.38 | 17.38 |
|           | 5 | 17.29 | 17.45 | 17.51 | 17.33 | 17.33 |
| 189080    | 2 | 17.98 | 18.04 | 18.07 | 17.99 | 17.99 |
| (321×481) | 3 | 16.94 | 16.97 | 17.03 | 16.96 | 16.96 |
|           | 4 | 16.64 | 16.73 | 16.77 | 16.68 | 16.68 |
|           | 5 | 16.43 | 16.59 | 16.64 | 16.48 | 16.48 |
| 229036    | 2 | 17.80 | 17.83 | 17.84 | 17.82 | 17.82 |
| (481×321) | 3 | 17.18 | 17.29 | 17.32 | 17.24 | 17.24 |
|           | 4 | 16.72 | 16.83 | 16.86 | 16.75 | 16.75 |
|           | 5 | 16.58 | 16.72 | 16.74 | 16.60 | 16.60 |
| 241004    | 2 | 17.73 | 17.81 | 17.82 | 17.76 | 17.76 |
| (481×321) | 3 | 16.20 | 16.30 | 16.35 | 16.22 | 16.22 |
|           | 4 | 15.67 | 15.81 | 15.88 | 15.69 | 15.69 |
|           | 5 | 15.37 | 15.52 | 15.55 | 15.45 | 15.45 |
| 253027    | 2 | 17.18 | 17.22 | 17.25 | 17.20 | 17.20 |
| (481×321) | 3 | 16.69 | 16.79 | 16.81 | 16.75 | 16.75 |
|           | 4 | 16.30 | 16.43 | 16.49 | 16.36 | 16.36 |
|           | 5 | 16.17 | 16.30 | 16.38 | 16.23 | 16.23 |
| 260058    | 2 | 18.01 | 18.06 | 18.07 | 18.03 | 18.03 |
| (481×321) | 3 | 17.54 | 17.62 | 17.66 | 17.58 | 17.58 |
|           | 4 | 17.34 | 17.47 | 17.51 | 17.38 | 17.38 |
|           | 5 | 17.18 | 17.30 | 17.34 | 17.24 | 17.24 |
| 271035    | 2 | 18.07 | 18.09 | 18.11 | 18.10 | 18.10 |
| (321×481) | 3 | 17.20 | 17.32 | 17.35 | 17.25 | 17.25 |
|           | 4 | 16.45 | 16.50 | 16.52 | 16.48 | 16.48 |

|           |   |       |       |       |       |       |
|-----------|---|-------|-------|-------|-------|-------|
|           | 5 | 16.04 | 16.19 | 16.27 | 16.08 | 16.08 |
| 285079    | 2 | 18.77 | 18.79 | 18.82 | 18.78 | 18.78 |
| (321×481) | 3 | 18.32 | 18.39 | 18.43 | 18.38 | 18.38 |
|           | 4 | 18.15 | 18.19 | 18.25 | 18.20 | 18.20 |
|           | 5 | 18.04 | 18.11 | 18.17 | 18.07 | 18.07 |
| 291000    | 2 | 17.72 | 17.74 | 17.77 | 17.74 | 17.74 |
| (481×321) | 3 | 17.09 | 17.17 | 17.21 | 17.15 | 17.15 |
|           | 4 | 16.44 | 16.48 | 16.53 | 16.47 | 16.47 |
|           | 5 | 15.95 | 16.04 | 16.09 | 15.98 | 15.98 |
| 304034    | 2 | 17.84 | 17.85 | 17.88 | 17.87 | 17.87 |
| (481×321) | 3 | 17.18 | 17.23 | 17.29 | 17.23 | 17.23 |
|           | 4 | 16.79 | 16.84 | 16.87 | 16.82 | 16.82 |
|           | 5 | 16.38 | 16.46 | 16.52 | 16.46 | 16.46 |
| 41033     | 2 | 18.31 | 18.37 | 18.38 | 18.33 | 18.33 |
| (481×321) | 3 | 18.04 | 18.13 | 18.16 | 18.09 | 18.09 |
|           | 4 | 19.98 | 20.09 | 20.12 | 20.02 | 20.02 |
|           | 5 | 17.88 | 18.03 | 18.08 | 17.96 | 17.96 |
| 54082     | 2 | 17.92 | 17.95 | 18.00 | 18.00 | 17.92 |
| (321×481) | 3 | 17.11 | 17.14 | 17.16 | 17.14 | 17.13 |
|           | 4 | 15.33 | 15.49 | 15.67 | 15.51 | 15.33 |
|           | 5 | 14.76 | 14.80 | 14.96 | 14.89 | 14.80 |
| 62096     | 2 | 17.30 | 17.38 | 17.41 | 17.32 | 17.32 |
| (481×321) | 3 | 17.15 | 17.26 | 17.32 | 17.18 | 17.18 |
|           | 4 | 17.10 | 17.15 | 17.17 | 17.15 | 17.15 |
|           | 5 | 16.95 | 17.04 | 17.12 | 16.99 | 16.99 |
| 69015     | 2 | 17.33 | 17.38 | 17.41 | 17.35 | 17.35 |
| (321×481) | 3 | 16.84 | 16.92 | 16.98 | 16.88 | 16.88 |
|           | 4 | 16.68 | 16.84 | 16.86 | 16.72 | 16.72 |
|           | 5 | 16.66 | 16.81 | 16.87 | 16.71 | 16.71 |
| 69040     | 2 | 18.12 | 18.13 | 18.14 | 18.13 | 18.13 |
| (481×321) | 3 | 17.79 | 17.90 | 17.94 | 17.81 | 17.81 |
|           | 4 | 17.64 | 17.71 | 17.77 | 17.68 | 17.68 |
|           | 5 | 17.60 | 17.77 | 17.80 | 17.66 | 17.66 |
| 8023      | 2 | 18.76 | 18.79 | 18.80 | 18.78 | 18.78 |
| (481×321) | 3 | 18.35 | 18.42 | 18.48 | 18.39 | 18.39 |
|           | 4 | 17.93 | 17.97 | 18.01 | 18.00 | 18.00 |
|           | 5 | 17.52 | 17.66 | 17.70 | 17.57 | 17.57 |
| 86016     | 2 | 18.00 | 18.00 | 18.02 | 18.00 | 18.02 |
| (481×321) | 3 | 17.45 | 17.57 | 17.58 | 17.56 | 17.46 |
|           | 4 | 17.21 | 17.31 | 17.31 | 17.25 | 17.22 |
|           | 5 | 15.69 | 15.81 | 15.78 | 15.83 | 15.74 |
| 108005    | 2 | 18.23 | 18.31 | 18.33 | 18.25 | 18.25 |
| (481×321) | 3 | 18.04 | 18.11 | 18.13 | 18.08 | 18.08 |
|           | 4 | 17.85 | 17.93 | 17.98 | 17.89 | 17.89 |

|           |   |       |       |       |       |       |
|-----------|---|-------|-------|-------|-------|-------|
|           | 5 | 17.73 | 17.85 | 17.89 | 17.79 | 17.79 |
| 108070    | 2 | 18.47 | 18.49 | 18.52 | 18.48 | 18.48 |
| (481×321) | 3 | 18.28 | 18.31 | 18.35 | 18.33 | 18.33 |
|           | 4 | 17.85 | 17.94 | 17.98 | 17.92 | 17.92 |
|           | 5 | 17.67 | 17.76 | 17.83 | 17.73 | 17.73 |
| 123074    | 2 | 18.53 | 18.59 | 18.60 | 18.54 | 18.54 |
| (481×321) | 3 | 17.25 | 17.29 | 17.32 | 17.31 | 17.31 |
|           | 4 | 16.62 | 16.74 | 16.79 | 16.64 | 16.64 |
|           | 5 | 16.23 | 16.36 | 16.40 | 16.28 | 16.28 |
| 134035    | 2 | 18.59 | 18.64 | 18.65 | 18.61 | 18.61 |
| (481×321) | 3 | 18.33 | 18.40 | 18.45 | 18.37 | 18.37 |
|           | 4 | 18.05 | 18.21 | 18.26 | 18.11 | 18.11 |
|           | 5 | 17.89 | 18.05 | 18.12 | 17.95 | 17.95 |
| 145086    | 2 | 18.07 | 18.14 | 18.16 | 18.10 | 18.10 |
| (481×321) | 3 | 17.68 | 17.74 | 17.77 | 17.71 | 17.71 |
|           | 4 | 17.36 | 17.51 | 17.58 | 17.43 | 17.43 |
|           | 5 | 16.89 | 17.02 | 17.08 | 16.94 | 16.94 |
| 148026    | 2 | 18.65 | 18.73 | 18.75 | 18.66 | 18.66 |
| (321×481) | 3 | 18.42 | 18.47 | 18.49 | 18.48 | 18.48 |
|           | 4 | 18.27 | 18.32 | 18.35 | 18.29 | 18.29 |
|           | 5 | 18.07 | 18.23 | 18.30 | 18.11 | 18.11 |
| 160068    | 2 | 18.21 | 18.23 | 18.24 | 18.24 | 18.22 |
| (481×321) | 3 | 17.89 | 17.95 | 17.98 | 19.96 | 17.89 |
|           | 4 | 16.61 | 16.74 | 16.79 | 16.78 | 16.71 |
|           | 5 | 15.59 | 15.62 | 15.81 | 15.65 | 15.59 |
| 182053    | 2 | 18.25 | 18.26 | 18.28 | 18.27 | 18.27 |
| (481×321) | 3 | 17.49 | 17.55 | 17.60 | 17.52 | 17.52 |
|           | 4 | 17.08 | 17.22 | 17.28 | 17.13 | 17.13 |
|           | 5 | 16.79 | 16.95 | 17.01 | 16.82 | 16.82 |
| 19021     | 2 | 18.19 | 18.21 | 18.22 | 18.22 | 18.22 |
| (481×321) | 3 | 17.79 | 17.84 | 17.89 | 17.82 | 17.82 |
|           | 4 | 17.57 | 17.62 | 17.68 | 17.60 | 17.60 |
|           | 5 | 17.52 | 17.63 | 17.68 | 17.58 | 17.58 |
| 196073    | 2 | 18.11 | 18.14 | 18.17 | 18.13 | 18.13 |
| (481×321) | 3 | 16.71 | 16.80 | 16.86 | 16.76 | 16.76 |
|           | 4 | 15.59 | 15.73 | 15.76 | 15.65 | 15.65 |
|           | 5 | 15.23 | 15.39 | 15.47 | 15.27 | 15.27 |
| 208001    | 2 | 18.37 | 18.45 | 18.48 | 18.38 | 18.38 |
| (321×481) | 3 | 17.92 | 18.01 | 18.06 | 17.97 | 17.97 |
|           | 4 | 17.57 | 17.73 | 17.75 | 17.64 | 17.64 |
|           | 5 | 17.41 | 17.54 | 17.59 | 17.44 | 17.44 |
| 210088    | 2 | 18.34 | 18.36 | 18.37 | 18.37 | 18.37 |
| (321×481) | 3 | 17.88 | 17.99 | 18.02 | 17.90 | 17.90 |
|           | 4 | 17.34 | 17.44 | 17.51 | 17.36 | 17.36 |



|           |   |       |       |       |       |       |
|-----------|---|-------|-------|-------|-------|-------|
|           | 5 | 16.98 | 17.11 | 17.16 | 17.06 | 17.06 |
| 21077     | 2 | 17.06 | 17.17 | 17.22 | 17.12 | 17.12 |
| (481×321) | 3 | 16.35 | 16.53 | 16.56 | 16.48 | 16.41 |
|           | 4 | 16.12 | 16.17 | 16.22 | 16.19 | 16.12 |
|           | 5 | 15.15 | 15.21 | 15.29 | 15.22 | 15.17 |
| 216081    | 2 | 18.36 | 18.39 | 18.41 | 18.37 | 18.37 |
| (481×321) | 3 | 18.04 | 18.13 | 18.18 | 18.10 | 18.10 |
|           | 4 | 18.77 | 18.88 | 18.95 | 18.84 | 18.84 |
|           | 5 | 17.48 | 17.61 | 17.67 | 17.54 | 17.54 |
| 223061    | 2 | 18.22 | 18.30 | 18.33 | 18.25 | 18.25 |
| (481×321) | 3 | 17.85 | 17.89 | 17.91 | 17.88 | 17.88 |
|           | 4 | 17.43 | 17.54 | 17.56 | 17.45 | 17.45 |
|           | 5 | 17.00 | 17.07 | 17.10 | 17.04 | 17.04 |
| 227092    | 2 | 18.63 | 18.66 | 18.67 | 18.64 | 18.64 |
| (321×481) | 3 | 17.62 | 17.69 | 17.73 | 17.68 | 17.68 |
|           | 4 | 16.74 | 16.79 | 16.84 | 16.81 | 16.81 |
|           | 5 | 16.24 | 16.31 | 16.39 | 16.30 | 16.30 |
| 253055    | 2 | 15.92 | 15.99 | 16.01 | 15.95 | 15.95 |
| (481×321) | 3 | 15.54 | 15.59 | 15.63 | 15.57 | 15.57 |
|           | 4 | 15.20 | 15.28 | 15.34 | 15.22 | 15.22 |
|           | 5 | 15.12 | 15.28 | 15.36 | 15.15 | 15.15 |
| 306005    | 2 | 16.59 | 16.66 | 16.68 | 16.62 | 16.62 |
| (481×321) | 3 | 16.12 | 16.18 | 16.22 | 16.18 | 16.18 |
|           | 4 | 15.92 | 16.08 | 16.13 | 15.97 | 15.97 |
|           | 5 | 15.80 | 15.89 | 15.96 | 15.85 | 15.85 |
| 3096      | 2 | 18.92 | 18.99 | 19.02 | 18.93 | 18.93 |
| (481×321) | 3 | 16.94 | 16.98 | 17.01 | 16.99 | 16.99 |
|           | 4 | 15.74 | 15.90 | 15.93 | 15.76 | 15.76 |
|           | 5 | 14.71 | 14.85 | 14.92 | 14.76 | 14.76 |
| 33039     | 2 | 18.56 | 18.57 | 18.60 | 18.57 | 18.57 |
| (321×481) | 3 | 17.91 | 18.01 | 18.03 | 17.93 | 17.93 |
|           | 4 | 17.46 | 17.59 | 17.63 | 17.51 | 17.51 |
|           | 5 | 17.08 | 17.22 | 17.28 | 17.14 | 17.14 |
| 376043    | 2 | 17.38 | 17.42 | 17.44 | 17.39 | 17.39 |
| (321×481) | 3 | 16.94 | 16.98 | 17.02 | 16.97 | 16.97 |
|           | 4 | 16.64 | 16.71 | 16.73 | 16.70 | 16.70 |
|           | 5 | 16.42 | 16.53 | 16.57 | 16.47 | 16.47 |
| 38082     | 2 | 18.12 | 18.14 | 18.16 | 18.13 | 18.13 |
| (481×321) | 3 | 17.81 | 17.87 | 17.91 | 17.83 | 17.83 |
|           | 4 | 17.60 | 17.71 | 17.78 | 17.66 | 17.66 |
|           | 5 | 16.89 | 16.99 | 17.06 | 16.97 | 16.97 |
| 41069     | 2 | 17.58 | 17.59 | 17.60 | 17.59 | 17.59 |
| (481×321) | 3 | 17.02 | 17.07 | 17.13 | 17.04 | 17.04 |
|           | 4 | 16.88 | 16.99 | 17.04 | 16.93 | 16.93 |

|           |   |       |       |       |       |       |
|-----------|---|-------|-------|-------|-------|-------|
|           | 5 | 16.75 | 16.90 | 16.97 | 16.79 | 16.79 |
| 86068     | 2 | 18.59 | 18.66 | 18.67 | 18.60 | 18.60 |
| (481×321) | 3 | 17.42 | 17.46 | 17.52 | 17.47 | 17.47 |
|           | 4 | 16.95 | 17.02 | 17.09 | 16.97 | 16.97 |
|           | 5 | 16.63 | 16.79 | 16.82 | 16.70 | 16.70 |
| 97033     | 2 | 17.35 | 17.42 | 17.45 | 17.36 | 17.36 |
| (481×321) | 3 | 17.00 | 17.03 | 17.07 | 17.05 | 17.05 |
|           | 4 | 16.69 | 16.82 | 16.87 | 16.71 | 16.71 |
|           | 5 | 16.58 | 16.71 | 16.75 | 16.60 | 16.60 |
| 101087    | 2 | 14.99 | 15.02 | 15.05 | 15.02 | 15.02 |
| (321×481) | 3 | 14.49 | 14.57 | 14.60 | 14.53 | 14.53 |
|           | 4 | 14.05 | 14.17 | 14.23 | 14.08 | 14.08 |
|           | 5 | 13.80 | 13.91 | 13.96 | 13.85 | 13.85 |
| 102061    | 2 | 17.95 | 17.99 | 18.02 | 17.96 | 17.96 |
| (321×481) | 3 | 17.59 | 17.64 | 17.68 | 17.63 | 17.63 |
|           | 4 | 17.21 | 17.30 | 17.34 | 17.28 | 17.28 |
|           | 5 | 17.00 | 17.10 | 17.18 | 17.05 | 17.05 |
| 105025    | 2 | 17.11 | 17.17 | 17.20 | 17.13 | 17.13 |
| (481×321) | 3 | 16.22 | 16.34 | 16.40 | 16.27 | 16.27 |
|           | 4 | 15.43 | 15.59 | 15.64 | 15.46 | 15.46 |
|           | 5 | 14.82 | 14.94 | 14.97 | 14.88 | 14.88 |
| 106024    | 2 | 17.64 | 17.68 | 17.71 | 17.65 | 17.65 |
| (481×321) | 3 | 17.21 | 17.31 | 17.35 | 17.24 | 17.24 |
|           | 4 | 17.19 | 17.26 | 17.30 | 17.23 | 17.23 |
|           | 5 | 16.87 | 17.01 | 17.05 | 16.91 | 16.91 |
| 143090    | 2 | 18.14 | 18.22 | 18.24 | 18.15 | 18.15 |
| (481×321) | 3 | 17.64 | 17.74 | 17.76 | 17.66 | 17.66 |
|           | 4 | 17.29 | 17.42 | 17.44 | 17.31 | 17.31 |
|           | 5 | 16.95 | 17.09 | 17.13 | 17.01 | 17.01 |
| 159008    | 2 | 18.86 | 18.94 | 18.96 | 18.87 | 18.87 |
| (481×321) | 3 | 18.58 | 18.65 | 18.71 | 18.62 | 18.62 |
|           | 4 | 18.30 | 18.44 | 18.47 | 18.32 | 18.32 |
|           | 5 | 18.04 | 18.19 | 18.22 | 18.09 | 18.09 |
| 175043    | 2 | 18.50 | 18.52 | 18.53 | 18.52 | 18.52 |
| (481×321) | 3 | 17.54 | 17.59 | 17.64 | 17.59 | 17.59 |
|           | 4 | 16.94 | 17.02 | 17.07 | 17.00 | 17.00 |
|           | 5 | 16.34 | 16.42 | 16.45 | 16.38 | 16.38 |
| 197017    | 2 | 18.48 | 18.53 | 18.55 | 18.50 | 18.50 |
| (481×321) | 3 | 17.97 | 18.03 | 18.06 | 18.02 | 18.02 |
|           | 4 | 17.54 | 17.58 | 17.64 | 17.60 | 17.60 |
|           | 5 | 17.22 | 17.37 | 17.40 | 17.29 | 17.29 |
| 236037    | 2 | 18.89 | 18.91 | 18.93 | 18.90 | 18.90 |
| (481×321) | 3 | 17.76 | 17.85 | 17.90 | 17.78 | 17.78 |
|           | 4 | 16.92 | 17.02 | 17.05 | 16.94 | 16.94 |

|           |   |       |       |       |       |       |
|-----------|---|-------|-------|-------|-------|-------|
|           | 5 | 16.40 | 16.48 | 16.54 | 16.45 | 16.45 |
| 241048    | 2 | 17.78 | 17.81 | 17.84 | 17.79 | 17.79 |
| (481×321) | 3 | 17.42 | 17.53 | 17.55 | 17.44 | 17.44 |
|           | 4 | 17.08 | 17.15 | 17.18 | 17.14 | 17.14 |
|           | 5 | 16.92 | 17.05 | 17.10 | 16.97 | 16.97 |
| 296059    | 2 | 18.26 | 18.32 | 18.33 | 18.29 | 18.29 |
| (481×321) | 3 | 17.79 | 17.90 | 17.95 | 17.83 | 17.83 |
|           | 4 | 17.46 | 17.57 | 17.60 | 17.51 | 17.51 |
|           | 5 | 17.16 | 17.27 | 17.32 | 17.24 | 17.24 |
| 299086    | 2 | 18.71 | 18.79 | 18.80 | 18.73 | 18.73 |
| (481×321) | 3 | 17.45 | 17.52 | 17.58 | 17.49 | 17.49 |
|           | 4 | 16.87 | 17.01 | 17.07 | 16.94 | 16.94 |
|           | 5 | 16.56 | 16.73 | 16.76 | 16.59 | 16.59 |
| 302008    | 2 | 16.61 | 16.67 | 16.68 | 16.63 | 16.63 |
| (321×481) | 3 | 16.54 | 16.61 | 16.65 | 16.60 | 16.60 |
|           | 4 | 16.49 | 16.55 | 16.58 | 16.52 | 16.52 |
|           | 5 | 16.47 | 16.60 | 16.65 | 16.52 | 16.51 |
| 304074    | 2 | 17.72 | 17.74 | 17.76 | 17.73 | 17.72 |
| (321×481) | 3 | 17.28 | 17.35 | 17.47 | 17.31 | 17.28 |
|           | 4 | 16.30 | 16.38 | 16.46 | 16.44 | 16.35 |
|           | 5 | 16.01 | 16.04 | 16.09 | 16.04 | 16.02 |
| 351093    | 2 | 16.54 | 16.56 | 16.58 | 16.57 | 16.57 |
| (481×321) | 3 | 16.31 | 16.35 | 16.37 | 16.36 | 16.36 |
|           | 4 | 16.23 | 16.27 | 16.33 | 16.30 | 16.30 |
|           | 5 | 16.12 | 16.32 | 16.40 | 16.17 | 16.17 |
| 361010    | 2 | 18.16 | 18.21 | 18.24 | 18.19 | 18.19 |
| (481×321) | 3 | 17.42 | 17.53 | 17.56 | 17.48 | 17.48 |
|           | 4 | 17.12 | 17.25 | 17.28 | 17.17 | 17.17 |
|           | 5 | 16.80 | 16.96 | 17.01 | 16.85 | 16.85 |
| 37073     | 2 | 18.50 | 18.53 | 18.55 | 18.53 | 18.50 |
| (481×321) | 3 | 18.09 | 18.16 | 18.21 | 18.12 | 18.09 |
|           | 4 | 16.27 | 16.38 | 16.48 | 16.37 | 16.27 |
|           | 5 | 15.41 | 15.81 | 15.92 | 15.70 | 15.40 |
| 385039    | 2 | 18.78 | 18.81 | 18.84 | 18.80 | 18.80 |
| (481×321) | 3 | 17.83 | 17.90 | 17.96 | 17.86 | 17.86 |
|           | 4 | 17.41 | 17.48 | 17.55 | 17.48 | 17.48 |
|           | 5 | 17.10 | 17.26 | 17.30 | 17.15 | 17.15 |
| 42012     | 2 | 18.26 | 18.30 | 18.31 | 18.29 | 18.29 |
| (321×481) | 3 | 17.89 | 17.97 | 18.01 | 17.92 | 17.92 |
|           | 4 | 17.61 | 17.76 | 17.81 | 17.68 | 17.68 |
|           | 5 | 17.52 | 17.64 | 17.68 | 17.55 | 17.55 |
| 55073     | 2 | 18.29 | 18.35 | 18.38 | 18.32 | 18.32 |
| (321×481) | 3 | 18.00 | 18.04 | 18.06 | 18.06 | 18.06 |
|           | 4 | 17.79 | 17.95 | 17.99 | 17.84 | 17.84 |

|           |   |       |       |       |       |       |
|-----------|---|-------|-------|-------|-------|-------|
|           | 5 | 17.63 | 17.76 | 17.83 | 17.70 | 17.70 |
| 65033     | 2 | 18.01 | 18.03 | 18.05 | 18.04 | 18.04 |
| (481×321) | 3 | 17.79 | 17.90 | 17.96 | 17.85 | 17.85 |
|           | 4 | 17.40 | 17.46 | 17.49 | 17.47 | 17.47 |
|           | 5 | 17.17 | 17.31 | 17.37 | 17.23 | 17.23 |
| 66053     | 2 | 18.47 | 18.50 | 18.52 | 18.50 | 18.49 |
| (481×321) | 3 | 18.01 | 18.07 | 18.05 | 18.06 | 18.02 |
|           | 4 | 16.89 | 16.97 | 17.13 | 17.03 | 16.94 |
|           | 5 | 16.31 | 16.42 | 16.51 | 16.46 | 16.33 |
| 69020     | 2 | 17.98 | 18.02 | 18.03 | 18.00 | 18.00 |
| (481×321) | 3 | 16.94 | 17.05 | 17.08 | 16.97 | 16.97 |
|           | 4 | 16.20 | 16.30 | 16.35 | 16.22 | 16.22 |
|           | 5 | 15.64 | 15.78 | 15.80 | 15.68 | 15.68 |
| 85048     | 2 | 17.92 | 17.97 | 18.00 | 17.95 | 17.95 |
| (481×321) | 3 | 17.37 | 17.46 | 17.52 | 17.41 | 17.41 |
|           | 4 | 16.79 | 16.92 | 16.98 | 16.81 | 16.81 |
|           | 5 | 16.28 | 16.35 | 16.41 | 16.33 | 16.33 |
| 87046     | 2 | 18.66 | 18.72 | 18.74 | 18.67 | 18.67 |
| (481×321) | 3 | 17.75 | 17.78 | 17.83 | 17.79 | 17.79 |
|           | 4 | 16.86 | 16.97 | 17.03 | 16.92 | 16.92 |
|           | 5 | 16.10 | 16.22 | 16.25 | 16.13 | 16.13 |

Table 4 Peak Signal to Noise Ratio (PSNR) of different segmented images using various algorithm

| Image ID  | level | Our algorithm | BA    | MMSA  | IBA   | OTSU  |
|-----------|-------|---------------|-------|-------|-------|-------|
| 101085    | 2     | 23.06         | 23.06 | 23.05 | 23.06 | 23.06 |
| (321×481) | 3     | 23.62         | 23.58 | 23.55 | 23.60 | 23.60 |
|           | 4     | 23.90         | 23.82 | 23.79 | 23.89 | 23.89 |
|           | 5     | 24.13         | 24.08 | 24.06 | 24.10 | 24.10 |
| 119082    | 2     | 23.24         | 23.24 | 23.23 | 23.23 | 23.23 |
| (481×321) | 3     | 23.68         | 23.64 | 23.61 | 23.67 | 23.67 |
|           | 4     | 23.95         | 23.89 | 23.88 | 23.92 | 23.92 |
|           | 5     | 24.20         | 24.12 | 24.10 | 24.17 | 24.17 |
| 126007    | 2     | 23.19         | 23.15 | 23.13 | 23.18 | 23.18 |
| (481×321) | 3     | 23.59         | 23.56 | 23.54 | 23.57 | 23.57 |
|           | 4     | 23.93         | 23.86 | 23.83 | 23.92 | 23.92 |
|           | 5     | 24.17         | 24.13 | 24.12 | 24.15 | 24.15 |
| 156065    | 2     | 23.02         | 23.02 | 23.00 | 23.01 | 23.01 |
| (481×321) | 3     | 23.44         | 23.41 | 23.38 | 23.42 | 23.42 |
|           | 4     | 23.79         | 23.71 | 23.67 | 23.75 | 23.75 |
|           | 5     | 23.96         | 23.88 | 23.87 | 23.92 | 23.92 |
| 157055    | 2     | 22.68         | 22.64 | 22.63 | 22.66 | 22.66 |
| (481×321) | 3     | 22.89         | 22.84 | 22.82 | 22.87 | 22.87 |
|           | 4     | 23.11         | 23.04 | 23.02 | 23.08 | 23.08 |

|           |   |       |       |       |       |       |
|-----------|---|-------|-------|-------|-------|-------|
|           | 5 | 23.21 | 23.12 | 23.11 | 23.20 | 23.20 |
| 16077     | 2 | 23.02 | 22.99 | 22.97 | 23.01 | 23.01 |
| (481×321) | 3 | 23.45 | 23.41 | 23.40 | 23.44 | 23.44 |
|           | 4 | 23.79 | 23.72 | 23.71 | 23.75 | 23.75 |
|           | 5 | 24.01 | 23.96 | 23.94 | 23.99 | 23.99 |
| 163085    | 2 | 22.98 | 22.97 | 22.96 | 22.98 | 22.98 |
| (481×321) | 3 | 23.36 | 23.33 | 23.30 | 23.34 | 23.34 |
|           | 4 | 23.59 | 23.56 | 23.54 | 23.57 | 23.57 |
|           | 5 | 23.71 | 23.67 | 23.64 | 23.67 | 23.67 |
| 167062    | 2 | 23.92 | 23.91 | 23.89 | 23.90 | 23.90 |
| (481×321) | 3 | 24.36 | 24.34 | 24.33 | 24.34 | 24.34 |
|           | 4 | 24.48 | 24.43 | 24.40 | 24.46 | 24.46 |
|           | 5 | 24.59 | 24.51 | 24.47 | 24.58 | 24.58 |
| 170057    | 2 | 22.69 | 22.68 | 22.67 | 22.68 | 22.68 |
| (481×321) | 3 | 23.04 | 23.01 | 22.98 | 23.02 | 23.02 |
|           | 4 | 23.35 | 23.29 | 23.27 | 23.33 | 23.33 |
|           | 5 | 23.52 | 23.48 | 23.45 | 23.48 | 23.48 |
| 175032    | 2 | 23.24 | 23.23 | 23.22 | 23.23 | 23.23 |
| (321×481) | 3 | 23.44 | 23.38 | 23.36 | 23.42 | 23.42 |
|           | 4 | 23.61 | 23.56 | 23.55 | 23.58 | 23.58 |
|           | 5 | 23.69 | 23.65 | 23.62 | 23.65 | 23.65 |
| 219090    | 2 | 22.79 | 22.75 | 22.74 | 22.77 | 22.77 |
| (481×321) | 3 | 23.04 | 23.02 | 22.99 | 23.01 | 23.01 |
|           | 4 | 23.26 | 23.18 | 23.16 | 23.24 | 23.24 |
|           | 5 | 23.36 | 23.31 | 23.30 | 23.32 | 23.32 |
| 220075    | 2 | 22.75 | 22.74 | 22.74 | 22.74 | 22.74 |
| (481×321) | 3 | 23.11 | 23.07 | 23.06 | 23.08 | 23.08 |
|           | 4 | 23.32 | 23.27 | 23.24 | 23.30 | 23.30 |
|           | 5 | 23.39 | 23.35 | 23.32 | 23.37 | 23.37 |
| 24077     | 2 | 23.01 | 23.40 | 23.40 | 23.42 | 23.41 |
| (481×321) | 3 | 23.44 | 23.50 | 23.47 | 23.54 | 23.55 |
|           | 4 | 23.75 | 23.55 | 23.53 | 23.59 | 23.60 |
|           | 5 | 23.99 | 23.71 | 23.63 | 23.70 | 23.71 |
| 295087    | 2 | 22.68 | 22.67 | 22.67 | 22.67 | 22.67 |
| (481×321) | 3 | 23.02 | 22.98 | 22.97 | 22.99 | 22.99 |
|           | 4 | 23.26 | 23.22 | 23.19 | 23.25 | 23.25 |
|           | 5 | 23.32 | 23.26 | 23.23 | 23.28 | 23.28 |
| 296007    | 2 | 22.99 | 22.98 | 22.97 | 22.97 | 22.97 |
| (481×321) | 3 | 23.18 | 23.15 | 23.14 | 23.15 | 23.15 |
|           | 4 | 23.32 | 23.26 | 23.23 | 23.30 | 23.30 |
|           | 5 | 23.37 | 23.30 | 23.27 | 23.35 | 23.35 |
| 300091    | 2 | 23.06 | 23.06 | 23.05 | 23.06 | 23.06 |
| (481×321) | 3 | 23.62 | 23.58 | 23.55 | 23.60 | 23.60 |
|           | 4 | 23.90 | 23.82 | 23.79 | 23.89 | 23.89 |

|           |   |       |       |       |       |       |
|-----------|---|-------|-------|-------|-------|-------|
|           | 5 | 24.13 | 24.08 | 24.06 | 24.10 | 24.10 |
| 38092     | 2 | 23.24 | 23.24 | 23.23 | 23.23 | 23.23 |
| (481×321) | 3 | 23.68 | 23.64 | 23.61 | 23.67 | 23.67 |
|           | 4 | 23.95 | 23.89 | 23.88 | 23.92 | 23.92 |
|           | 5 | 24.20 | 24.12 | 24.10 | 24.17 | 24.17 |
| 42049     | 2 | 23.90 | 22.98 | 22.96 | 22.97 | 23.00 |
| (481×321) | 3 | 24.34 | 23.13 | 23.11 | 23.14 | 23.16 |
|           | 4 | 24.46 | 23.67 | 23.67 | 23.66 | 23.66 |
|           | 5 | 24.58 | 24.09 | 24.09 | 24.09 | 24.09 |
| 43074     | 2 | 23.02 | 23.02 | 23.00 | 23.01 | 23.01 |
| (481×321) | 3 | 23.44 | 23.41 | 23.38 | 23.42 | 23.42 |
|           | 4 | 23.79 | 23.71 | 23.67 | 23.75 | 23.75 |
|           | 5 | 23.96 | 23.88 | 23.87 | 23.92 | 23.92 |
| 45096     | 2 | 22.68 | 22.64 | 22.63 | 22.66 | 22.66 |
| (481×321) | 3 | 22.89 | 22.84 | 22.82 | 22.87 | 22.87 |
|           | 4 | 23.11 | 23.04 | 23.02 | 23.08 | 23.08 |
|           | 5 | 23.21 | 23.12 | 23.11 | 23.20 | 23.20 |
| 58060     | 2 | 23.02 | 22.99 | 22.97 | 23.01 | 23.01 |
| (481×321) | 3 | 23.45 | 23.41 | 23.40 | 23.44 | 23.44 |
|           | 4 | 23.79 | 23.72 | 23.71 | 23.75 | 23.75 |
|           | 5 | 24.01 | 23.96 | 23.94 | 23.99 | 23.99 |
| 76053     | 2 | 22.98 | 22.97 | 22.96 | 22.98 | 22.98 |
| (481×321) | 3 | 23.36 | 23.33 | 23.30 | 23.34 | 23.34 |
|           | 4 | 23.59 | 23.56 | 23.54 | 23.57 | 23.57 |
|           | 5 | 23.71 | 23.67 | 23.64 | 23.67 | 23.67 |
| 78004     | 2 | 23.92 | 23.91 | 23.89 | 23.90 | 23.90 |
| (321×481) | 3 | 24.36 | 24.34 | 24.33 | 24.34 | 24.34 |
|           | 4 | 24.48 | 24.43 | 24.40 | 24.46 | 24.46 |
|           | 5 | 24.59 | 24.51 | 24.47 | 24.58 | 24.58 |
| 86000     | 2 | 22.69 | 22.68 | 22.67 | 22.68 | 22.68 |
| (321×481) | 3 | 23.04 | 23.01 | 22.98 | 23.02 | 23.02 |
|           | 4 | 23.35 | 23.29 | 23.27 | 23.33 | 23.33 |
|           | 5 | 23.52 | 23.48 | 23.45 | 23.48 | 23.48 |
| 89072     | 2 | 22.98 | 22.97 | 22.97 | 22.98 | 22.97 |
| (321×481) | 3 | 23.34 | 23.03 | 22.99 | 23.02 | 23.01 |
|           | 4 | 23.57 | 23.33 | 23.30 | 23.32 | 23.35 |
|           | 5 | 23.67 | 23.46 | 23.43 | 23.44 | 23.50 |
| 103070    | 2 | 22.79 | 22.75 | 22.74 | 22.77 | 22.77 |
| (481×321) | 3 | 23.04 | 23.02 | 22.99 | 23.01 | 23.01 |
|           | 4 | 23.26 | 23.18 | 23.16 | 23.24 | 23.24 |
|           | 5 | 23.36 | 23.31 | 23.30 | 23.32 | 23.32 |
| 108082    | 2 | 22.75 | 22.74 | 22.74 | 22.74 | 22.74 |
| (481×321) | 3 | 23.11 | 23.07 | 23.06 | 23.08 | 23.08 |
|           | 4 | 23.32 | 23.27 | 23.24 | 23.30 | 23.30 |

|           |   |       |       |       |       |       |
|-----------|---|-------|-------|-------|-------|-------|
|           | 5 | 23.39 | 23.35 | 23.32 | 23.37 | 23.37 |
| 109053    | 2 | 23.42 | 23.41 | 23.40 | 23.41 | 23.41 |
| (481×321) | 3 | 23.69 | 23.67 | 23.66 | 23.68 | 23.68 |
|           | 4 | 23.83 | 23.80 | 23.79 | 23.82 | 23.82 |
|           | 5 | 23.91 | 23.86 | 23.82 | 23.87 | 23.87 |
| 12084     | 2 | 22.68 | 22.67 | 22.67 | 22.67 | 22.67 |
| (481×321) | 3 | 23.02 | 22.98 | 22.97 | 22.99 | 22.99 |
|           | 4 | 23.26 | 23.22 | 23.19 | 23.25 | 23.25 |
|           | 5 | 23.32 | 23.26 | 23.23 | 23.28 | 23.28 |
| 130026    | 2 | 22.99 | 22.98 | 22.97 | 22.97 | 22.97 |
| (481×321) | 3 | 23.18 | 23.15 | 23.14 | 23.15 | 23.15 |
|           | 4 | 23.32 | 23.26 | 23.23 | 23.30 | 23.30 |
|           | 5 | 23.37 | 23.30 | 23.27 | 23.35 | 23.35 |
| 14037     | 2 | 23.06 | 23.06 | 23.05 | 23.06 | 23.06 |
| (481×321) | 3 | 23.62 | 23.58 | 23.55 | 23.60 | 23.60 |
|           | 4 | 23.90 | 23.82 | 23.79 | 23.89 | 23.89 |
|           | 5 | 24.13 | 24.08 | 24.06 | 24.10 | 24.10 |
| 147091    | 2 | 23.24 | 23.24 | 23.23 | 23.23 | 23.23 |
| (481×321) | 3 | 23.68 | 23.64 | 23.61 | 23.67 | 23.67 |
|           | 4 | 23.95 | 23.89 | 23.88 | 23.92 | 23.92 |
|           | 5 | 24.20 | 24.12 | 24.10 | 24.17 | 24.17 |
| 148089    | 2 | 23.19 | 23.15 | 23.13 | 23.18 | 23.18 |
| (481×321) | 3 | 23.59 | 23.56 | 23.54 | 23.57 | 23.57 |
|           | 4 | 23.93 | 23.86 | 23.83 | 23.92 | 23.92 |
|           | 5 | 24.17 | 24.13 | 24.12 | 24.15 | 24.15 |
| 167083    | 2 | 23.02 | 23.02 | 23.00 | 23.01 | 23.01 |
| (321×481) | 3 | 23.44 | 23.41 | 23.38 | 23.42 | 23.42 |
|           | 4 | 23.79 | 23.71 | 23.67 | 23.75 | 23.75 |
|           | 5 | 23.96 | 23.88 | 23.87 | 23.92 | 23.92 |
| 189080    | 2 | 22.68 | 22.64 | 22.63 | 22.66 | 22.66 |
| (321×481) | 3 | 22.89 | 22.84 | 22.82 | 22.87 | 22.87 |
|           | 4 | 23.11 | 23.04 | 23.02 | 23.08 | 23.08 |
|           | 5 | 23.21 | 23.12 | 23.11 | 23.20 | 23.20 |
| 229036    | 2 | 23.02 | 22.99 | 22.97 | 23.01 | 23.01 |
| (481×321) | 3 | 23.45 | 23.41 | 23.40 | 23.44 | 23.44 |
|           | 4 | 23.79 | 23.72 | 23.71 | 23.75 | 23.75 |
|           | 5 | 24.01 | 23.96 | 23.94 | 23.99 | 23.99 |
| 241004    | 2 | 22.98 | 22.97 | 22.96 | 22.98 | 22.98 |
| (481×321) | 3 | 23.36 | 23.33 | 23.30 | 23.34 | 23.34 |
|           | 4 | 23.59 | 23.56 | 23.54 | 23.57 | 23.57 |
|           | 5 | 23.71 | 23.67 | 23.64 | 23.67 | 23.67 |
| 253027    | 2 | 23.92 | 23.91 | 23.89 | 23.90 | 23.90 |
| (481×321) | 3 | 24.36 | 24.34 | 24.33 | 24.34 | 24.34 |
|           | 4 | 24.48 | 24.43 | 24.40 | 24.46 | 24.46 |

|           |   |       |       |       |       |       |
|-----------|---|-------|-------|-------|-------|-------|
|           | 5 | 24.59 | 24.51 | 24.47 | 24.58 | 24.58 |
| 260058    | 2 | 22.69 | 22.68 | 22.67 | 22.68 | 22.68 |
| (481×321) | 3 | 23.04 | 23.01 | 22.98 | 23.02 | 23.02 |
|           | 4 | 23.35 | 23.29 | 23.27 | 23.33 | 23.33 |
|           | 5 | 23.52 | 23.48 | 23.45 | 23.48 | 23.48 |
| 271035    | 2 | 23.24 | 23.23 | 23.22 | 23.23 | 23.23 |
| (321×481) | 3 | 23.44 | 23.38 | 23.36 | 23.42 | 23.42 |
|           | 4 | 23.61 | 23.56 | 23.55 | 23.58 | 23.58 |
|           | 5 | 23.69 | 23.65 | 23.62 | 23.65 | 23.65 |
| 285079    | 2 | 22.79 | 22.75 | 22.74 | 22.77 | 22.77 |
| (321×481) | 3 | 23.04 | 23.02 | 22.99 | 23.01 | 23.01 |
|           | 4 | 23.26 | 23.18 | 23.16 | 23.24 | 23.24 |
|           | 5 | 23.36 | 23.31 | 23.30 | 23.32 | 23.32 |
| 291000    | 2 | 22.75 | 22.74 | 22.74 | 22.74 | 22.74 |
| (481×321) | 3 | 23.11 | 23.07 | 23.06 | 23.08 | 23.08 |
|           | 4 | 23.32 | 23.27 | 23.24 | 23.30 | 23.30 |
|           | 5 | 23.39 | 23.35 | 23.32 | 23.37 | 23.37 |
| 304034    | 2 | 23.42 | 23.41 | 23.40 | 23.41 | 23.41 |
| (481×321) | 3 | 23.69 | 23.67 | 23.66 | 23.68 | 23.68 |
|           | 4 | 23.83 | 23.80 | 23.79 | 23.82 | 23.82 |
|           | 5 | 23.91 | 23.86 | 23.82 | 23.87 | 23.87 |
| 41033     | 2 | 22.68 | 22.67 | 22.67 | 22.67 | 22.67 |
| (481×321) | 3 | 23.02 | 22.98 | 22.97 | 22.99 | 22.99 |
|           | 4 | 23.26 | 23.22 | 23.19 | 23.25 | 23.25 |
|           | 5 | 23.32 | 23.26 | 23.23 | 23.28 | 23.28 |
| 54082     | 2 | 23.23 | 23.05 | 23.03 | 23.03 | 23.06 |
| (321×481) | 3 | 23.42 | 23.45 | 23.44 | 23.45 | 23.46 |
|           | 4 | 23.58 | 24.33 | 24.23 | 24.32 | 24.42 |
|           | 5 | 23.65 | 24.73 | 24.63 | 24.67 | 24.73 |
| 62096     | 2 | 23.06 | 23.06 | 23.05 | 23.06 | 23.06 |
| (481×321) | 3 | 23.62 | 23.58 | 23.55 | 23.60 | 23.60 |
|           | 4 | 23.90 | 23.82 | 23.79 | 23.89 | 23.89 |
|           | 5 | 24.13 | 24.08 | 24.06 | 24.10 | 24.10 |
| 69015     | 2 | 23.24 | 23.24 | 23.23 | 23.23 | 23.23 |
| (321×481) | 3 | 23.68 | 23.64 | 23.61 | 23.67 | 23.67 |
|           | 4 | 23.95 | 23.89 | 23.88 | 23.92 | 23.92 |
|           | 5 | 24.20 | 24.12 | 24.10 | 24.17 | 24.17 |
| 69040     | 2 | 23.19 | 23.15 | 23.13 | 23.18 | 23.18 |
| (481×321) | 3 | 23.59 | 23.56 | 23.54 | 23.57 | 23.57 |
|           | 4 | 23.93 | 23.86 | 23.83 | 23.92 | 23.92 |
|           | 5 | 24.17 | 24.13 | 24.12 | 24.15 | 24.15 |
| 8023      | 2 | 23.02 | 23.02 | 23.00 | 23.01 | 23.01 |
| (481×321) | 3 | 23.44 | 23.41 | 23.38 | 23.42 | 23.42 |
|           | 4 | 23.79 | 23.71 | 23.67 | 23.75 | 23.75 |



|           |   |       |       |       |       |       |
|-----------|---|-------|-------|-------|-------|-------|
|           | 5 | 23.96 | 23.88 | 23.87 | 23.92 | 23.92 |
| 86016     | 2 | 22.68 | 23.03 | 23.02 | 23.03 | 23.02 |
| (481×321) | 3 | 23.02 | 23.24 | 23.23 | 23.24 | 23.29 |
|           | 4 | 23.33 | 23.36 | 23.36 | 23.40 | 23.41 |
|           | 5 | 23.48 | 24.15 | 24.17 | 24.14 | 24.19 |
| 108005    | 2 | 23.02 | 22.99 | 22.97 | 23.01 | 23.01 |
| (481×321) | 3 | 23.45 | 23.41 | 23.40 | 23.44 | 23.44 |
|           | 4 | 23.79 | 23.72 | 23.71 | 23.75 | 23.75 |
|           | 5 | 24.01 | 23.96 | 23.94 | 23.99 | 23.99 |
| 108070    | 2 | 22.98 | 22.97 | 22.96 | 22.98 | 22.98 |
| (481×321) | 3 | 23.36 | 23.33 | 23.30 | 23.34 | 23.34 |
|           | 4 | 23.59 | 23.56 | 23.54 | 23.57 | 23.57 |
|           | 5 | 23.71 | 23.67 | 23.64 | 23.67 | 23.67 |
| 123074    | 2 | 23.92 | 23.91 | 23.89 | 23.90 | 23.90 |
| (481×321) | 3 | 24.36 | 24.34 | 24.33 | 24.34 | 24.34 |
|           | 4 | 24.48 | 24.43 | 24.40 | 24.46 | 24.46 |
|           | 5 | 24.59 | 24.51 | 24.47 | 24.58 | 24.58 |
| 134035    | 2 | 22.69 | 22.68 | 22.67 | 22.68 | 22.68 |
| (481×321) | 3 | 23.04 | 23.01 | 22.98 | 23.02 | 23.02 |
|           | 4 | 23.35 | 23.29 | 23.27 | 23.33 | 23.33 |
|           | 5 | 23.52 | 23.48 | 23.45 | 23.48 | 23.48 |
| 145086    | 2 | 23.24 | 23.23 | 23.22 | 23.23 | 23.23 |
| (481×321) | 3 | 23.44 | 23.38 | 23.36 | 23.42 | 23.42 |
|           | 4 | 23.61 | 23.56 | 23.55 | 23.58 | 23.58 |
|           | 5 | 23.69 | 23.65 | 23.62 | 23.65 | 23.65 |
| 148026    | 2 | 22.79 | 22.75 | 22.74 | 22.77 | 22.77 |
| (321×481) | 3 | 23.04 | 23.02 | 22.99 | 23.01 | 23.01 |
|           | 4 | 23.26 | 23.18 | 23.16 | 23.24 | 23.24 |
|           | 5 | 23.36 | 23.31 | 23.30 | 23.32 | 23.32 |
| 160068    | 2 | 22.74 | 22.92 | 22.91 | 22.91 | 22.92 |
| (481×321) | 3 | 23.08 | 23.05 | 23.04 | 22.13 | 23.08 |
|           | 4 | 23.30 | 23.66 | 23.63 | 23.63 | 23.67 |
|           | 5 | 23.37 | 24.26 | 24.15 | 24.24 | 24.27 |
| 182053    | 2 | 23.42 | 23.41 | 23.40 | 23.41 | 23.41 |
| (481×321) | 3 | 23.69 | 23.67 | 23.66 | 23.68 | 23.68 |
|           | 4 | 23.83 | 23.80 | 23.79 | 23.82 | 23.82 |
|           | 5 | 23.91 | 23.86 | 23.82 | 23.87 | 23.87 |
| 19021     | 2 | 22.68 | 22.67 | 22.67 | 22.67 | 22.67 |
| (481×321) | 3 | 23.02 | 22.98 | 22.97 | 22.99 | 22.99 |
|           | 4 | 23.26 | 23.22 | 23.19 | 23.25 | 23.25 |
|           | 5 | 23.32 | 23.26 | 23.23 | 23.28 | 23.28 |
| 196073    | 2 | 22.99 | 22.98 | 22.97 | 22.97 | 22.97 |
| (481×321) | 3 | 23.18 | 23.15 | 23.14 | 23.15 | 23.15 |
|           | 4 | 23.32 | 23.26 | 23.23 | 23.30 | 23.30 |

|           |   |       |       |       |       |       |
|-----------|---|-------|-------|-------|-------|-------|
|           | 5 | 23.37 | 23.30 | 23.27 | 23.35 | 23.35 |
| 208001    | 2 | 23.06 | 23.06 | 23.05 | 23.06 | 23.06 |
| (321×481) | 3 | 23.62 | 23.58 | 23.55 | 23.60 | 23.60 |
|           | 4 | 23.90 | 23.82 | 23.79 | 23.89 | 23.89 |
|           | 5 | 24.13 | 24.08 | 24.06 | 24.10 | 24.10 |
| 210088    | 2 | 23.24 | 23.24 | 23.23 | 23.23 | 23.23 |
| (321×481) | 3 | 23.68 | 23.64 | 23.61 | 23.67 | 23.67 |
|           | 4 | 23.95 | 23.89 | 23.88 | 23.92 | 23.92 |
|           | 5 | 24.20 | 24.12 | 24.10 | 24.17 | 24.17 |
| 21077     | 2 | 22.77 | 23.44 | 23.41 | 23.46 | 23.46 |
| (481×321) | 3 | 23.01 | 23.77 | 23.75 | 23.79 | 23.83 |
|           | 4 | 23.24 | 23.96 | 23.93 | 23.95 | 23.98 |
|           | 5 | 23.32 | 24.49 | 24.44 | 24.48 | 24.51 |
| 216081    | 2 | 23.02 | 23.02 | 23.00 | 23.01 | 23.01 |
| (481×321) | 3 | 23.44 | 23.41 | 23.38 | 23.42 | 23.42 |
|           | 4 | 23.79 | 23.71 | 23.67 | 23.75 | 23.75 |
|           | 5 | 23.96 | 23.88 | 23.87 | 23.92 | 23.92 |
| 223061    | 2 | 22.68 | 22.64 | 22.63 | 22.66 | 22.66 |
| (481×321) | 3 | 22.89 | 22.84 | 22.82 | 22.87 | 22.87 |
|           | 4 | 23.11 | 23.04 | 23.02 | 23.08 | 23.08 |
|           | 5 | 23.21 | 23.12 | 23.11 | 23.20 | 23.20 |
| 227092    | 2 | 23.02 | 22.99 | 22.97 | 23.01 | 23.01 |
| (321×481) | 3 | 23.45 | 23.41 | 23.40 | 23.44 | 23.44 |
|           | 4 | 23.79 | 23.72 | 23.71 | 23.75 | 23.75 |
|           | 5 | 24.01 | 23.96 | 23.94 | 23.99 | 23.99 |
| 253055    | 2 | 22.98 | 22.97 | 22.96 | 22.98 | 22.98 |
| (481×321) | 3 | 23.36 | 23.33 | 23.30 | 23.34 | 23.34 |
|           | 4 | 23.59 | 23.56 | 23.54 | 23.57 | 23.57 |
|           | 5 | 23.71 | 23.67 | 23.64 | 23.67 | 23.67 |
| 306005    | 2 | 23.92 | 23.91 | 23.89 | 23.90 | 23.90 |
| (481×321) | 3 | 24.36 | 24.34 | 24.33 | 24.34 | 24.34 |
|           | 4 | 24.48 | 24.43 | 24.40 | 24.46 | 24.46 |
|           | 5 | 24.59 | 24.51 | 24.47 | 24.58 | 24.58 |
| 3096      | 2 | 22.69 | 22.68 | 22.67 | 22.68 | 22.68 |
| (481×321) | 3 | 23.04 | 23.01 | 22.98 | 23.02 | 23.02 |
|           | 4 | 23.35 | 23.29 | 23.27 | 23.33 | 23.33 |
|           | 5 | 23.52 | 23.48 | 23.45 | 23.48 | 23.48 |
| 33039     | 2 | 23.24 | 23.23 | 23.22 | 23.23 | 23.23 |
| (321×481) | 3 | 23.44 | 23.38 | 23.36 | 23.42 | 23.42 |
|           | 4 | 23.61 | 23.56 | 23.55 | 23.58 | 23.58 |
|           | 5 | 23.69 | 23.65 | 23.62 | 23.65 | 23.65 |
| 376043    | 2 | 22.79 | 22.75 | 22.74 | 22.77 | 22.77 |
| (321×481) | 3 | 23.04 | 23.02 | 22.99 | 23.01 | 23.01 |
|           | 4 | 23.26 | 23.18 | 23.16 | 23.24 | 23.24 |

|           |   |       |       |       |       |       |
|-----------|---|-------|-------|-------|-------|-------|
|           | 5 | 23.36 | 23.31 | 23.30 | 23.32 | 23.32 |
| 38082     | 2 | 22.75 | 22.74 | 22.74 | 22.74 | 22.74 |
| (481×321) | 3 | 23.11 | 23.07 | 23.06 | 23.08 | 23.08 |
|           | 4 | 23.32 | 23.27 | 23.24 | 23.30 | 23.30 |
|           | 5 | 23.39 | 23.35 | 23.32 | 23.37 | 23.37 |
| 41069     | 2 | 23.42 | 23.41 | 23.40 | 23.41 | 23.41 |
| (481×321) | 3 | 23.69 | 23.67 | 23.66 | 23.68 | 23.68 |
|           | 4 | 23.83 | 23.80 | 23.79 | 23.82 | 23.82 |
|           | 5 | 23.91 | 23.86 | 23.82 | 23.87 | 23.87 |
| 86068     | 2 | 22.68 | 22.67 | 22.67 | 22.67 | 22.67 |
| (481×321) | 3 | 23.02 | 22.98 | 22.97 | 22.99 | 22.99 |
|           | 4 | 23.26 | 23.22 | 23.19 | 23.25 | 23.25 |
|           | 5 | 23.32 | 23.26 | 23.23 | 23.28 | 23.28 |
| 97033     | 2 | 22.99 | 22.98 | 22.97 | 22.97 | 22.97 |
| (481×321) | 3 | 23.18 | 23.15 | 23.14 | 23.15 | 23.15 |
|           | 4 | 23.32 | 23.26 | 23.23 | 23.30 | 23.30 |
|           | 5 | 23.37 | 23.30 | 23.27 | 23.35 | 23.35 |
| 101087    | 2 | 23.06 | 23.06 | 23.05 | 23.06 | 23.06 |
| (321×481) | 3 | 23.62 | 23.58 | 23.55 | 23.60 | 23.60 |
|           | 4 | 23.90 | 23.82 | 23.79 | 23.89 | 23.89 |
|           | 5 | 24.13 | 24.08 | 24.06 | 24.10 | 24.10 |
| 102061    | 2 | 23.24 | 23.24 | 23.23 | 23.23 | 23.23 |
| (321×481) | 3 | 23.68 | 23.64 | 23.61 | 23.67 | 23.67 |
|           | 4 | 23.95 | 23.89 | 23.88 | 23.92 | 23.92 |
|           | 5 | 24.20 | 24.12 | 24.10 | 24.17 | 24.17 |
| 105025    | 2 | 23.19 | 23.15 | 23.13 | 23.18 | 23.18 |
| (481×321) | 3 | 23.59 | 23.56 | 23.54 | 23.57 | 23.57 |
|           | 4 | 23.93 | 23.86 | 23.83 | 23.92 | 23.92 |
|           | 5 | 24.17 | 24.13 | 24.12 | 24.15 | 24.15 |
| 106024    | 2 | 23.02 | 23.02 | 23.00 | 23.01 | 23.01 |
| (481×321) | 3 | 23.44 | 23.41 | 23.38 | 23.42 | 23.42 |
|           | 4 | 23.79 | 23.71 | 23.67 | 23.75 | 23.75 |
|           | 5 | 23.96 | 23.88 | 23.87 | 23.92 | 23.92 |
| 143090    | 2 | 22.68 | 22.64 | 22.63 | 22.66 | 22.66 |
| (481×321) | 3 | 22.89 | 22.84 | 22.82 | 22.87 | 22.87 |
|           | 4 | 23.11 | 23.04 | 23.02 | 23.08 | 23.08 |
|           | 5 | 23.21 | 23.12 | 23.11 | 23.20 | 23.20 |
| 159008    | 2 | 23.02 | 22.99 | 22.97 | 23.01 | 23.01 |
| (481×321) | 3 | 23.45 | 23.41 | 23.40 | 23.44 | 23.44 |
|           | 4 | 23.79 | 23.72 | 23.71 | 23.75 | 23.75 |
|           | 5 | 24.01 | 23.96 | 23.94 | 23.99 | 23.99 |
| 175043    | 2 | 22.98 | 22.97 | 22.96 | 22.98 | 22.98 |
| (481×321) | 3 | 23.36 | 23.33 | 23.30 | 23.34 | 23.34 |
|           | 4 | 23.59 | 23.56 | 23.54 | 23.57 | 23.57 |

|           |   |       |       |       |       |       |
|-----------|---|-------|-------|-------|-------|-------|
|           | 5 | 23.71 | 23.67 | 23.64 | 23.67 | 23.67 |
| 197017    | 2 | 23.92 | 23.91 | 23.89 | 23.90 | 23.90 |
| (481×321) | 3 | 24.36 | 24.34 | 24.33 | 24.34 | 24.34 |
|           | 4 | 24.48 | 24.43 | 24.40 | 24.46 | 24.46 |
|           | 5 | 24.59 | 24.51 | 24.47 | 24.58 | 24.58 |
| 236037    | 2 | 22.69 | 22.68 | 22.67 | 22.68 | 22.68 |
| (481×321) | 3 | 23.04 | 23.01 | 22.98 | 23.02 | 23.02 |
|           | 4 | 23.35 | 23.29 | 23.27 | 23.33 | 23.33 |
|           | 5 | 23.52 | 23.48 | 23.45 | 23.48 | 23.48 |
| 241048    | 2 | 23.24 | 23.23 | 23.22 | 23.23 | 23.23 |
| (481×321) | 3 | 23.44 | 23.38 | 23.36 | 23.42 | 23.42 |
|           | 4 | 23.61 | 23.56 | 23.55 | 23.58 | 23.58 |
|           | 5 | 23.69 | 23.65 | 23.62 | 23.65 | 23.65 |
| 296059    | 2 | 22.79 | 22.75 | 22.74 | 22.77 | 22.77 |
| (481×321) | 3 | 23.04 | 23.02 | 22.99 | 23.01 | 23.01 |
|           | 4 | 23.26 | 23.18 | 23.16 | 23.24 | 23.24 |
|           | 5 | 23.36 | 23.31 | 23.30 | 23.32 | 23.32 |
| 299086    | 2 | 22.75 | 22.74 | 22.74 | 22.74 | 22.74 |
| (481×321) | 3 | 23.11 | 23.07 | 23.06 | 23.08 | 23.08 |
|           | 4 | 23.32 | 23.27 | 23.24 | 23.30 | 23.30 |
|           | 5 | 23.39 | 23.35 | 23.32 | 23.37 | 23.37 |
| 302008    | 2 | 23.42 | 23.41 | 23.40 | 23.41 | 23.41 |
| (321×481) | 3 | 23.69 | 23.67 | 23.66 | 23.68 | 23.68 |
|           | 4 | 23.83 | 23.80 | 23.79 | 23.82 | 23.82 |
|           | 5 | 23.91 | 23.86 | 23.82 | 23.87 | 23.87 |
| 304074    | 2 | 22.97 | 23.15 | 23.14 | 23.16 | 23.16 |
| (321×481) | 3 | 23.15 | 23.34 | 23.28 | 23.36 | 23.38 |
|           | 4 | 23.30 | 23.84 | 23.80 | 23.81 | 23.86 |
|           | 5 | 23.35 | 24.03 | 24.00 | 24.03 | 24.04 |
| 351093    | 2 | 22.99 | 22.98 | 22.97 | 22.97 | 22.97 |
| (481×321) | 3 | 23.18 | 23.15 | 23.14 | 23.15 | 23.15 |
|           | 4 | 23.32 | 23.26 | 23.23 | 23.30 | 23.30 |
|           | 5 | 23.37 | 23.30 | 23.27 | 23.35 | 23.35 |
| 361010    | 2 | 23.06 | 23.06 | 23.05 | 23.06 | 23.06 |
| (481×321) | 3 | 23.62 | 23.58 | 23.55 | 23.60 | 23.60 |
|           | 4 | 23.90 | 23.82 | 23.79 | 23.89 | 23.89 |
|           | 5 | 24.13 | 24.08 | 24.06 | 24.10 | 24.10 |
| 37073     | 2 | 23.41 | 22.77 | 22.76 | 22.77 | 22.79 |
| (481×321) | 3 | 23.68 | 22.95 | 22.92 | 22.97 | 22.98 |
|           | 4 | 23.82 | 23.84 | 23.79 | 23.85 | 23.90 |
|           | 5 | 23.87 | 24.15 | 24.09 | 24.21 | 24.38 |
| 385039    | 2 | 23.19 | 23.15 | 23.13 | 23.18 | 23.18 |
| (481×321) | 3 | 23.59 | 23.56 | 23.54 | 23.57 | 23.57 |
|           | 4 | 23.93 | 23.86 | 23.83 | 23.92 | 23.92 |

|           |   |       |       |       |       |       |
|-----------|---|-------|-------|-------|-------|-------|
|           | 5 | 24.17 | 24.13 | 24.12 | 24.15 | 24.15 |
| 42012     | 2 | 23.02 | 23.02 | 23.00 | 23.01 | 23.01 |
| (321×481) | 3 | 23.44 | 23.41 | 23.38 | 23.42 | 23.42 |
|           | 4 | 23.79 | 23.71 | 23.67 | 23.75 | 23.75 |
|           | 5 | 23.96 | 23.88 | 23.87 | 23.92 | 23.92 |
| 55073     | 2 | 22.68 | 22.64 | 22.63 | 22.66 | 22.66 |
| (321×481) | 3 | 22.89 | 22.84 | 22.82 | 22.87 | 22.87 |
|           | 4 | 23.11 | 23.04 | 23.02 | 23.08 | 23.08 |
|           | 5 | 23.21 | 23.12 | 23.11 | 23.20 | 23.20 |
| 65033     | 2 | 23.02 | 22.99 | 22.97 | 23.01 | 23.01 |
| (481×321) | 3 | 23.45 | 23.41 | 23.40 | 23.44 | 23.44 |
|           | 4 | 23.79 | 23.72 | 23.71 | 23.75 | 23.75 |
|           | 5 | 24.01 | 23.96 | 23.94 | 23.99 | 23.99 |
| 66053     | 2 | 22.67 | 22.79 | 22.78 | 22.79 | 22.79 |
| (481×321) | 3 | 22.99 | 22.99 | 23.00 | 23.00 | 23.02 |
|           | 4 | 23.25 | 23.54 | 23.46 | 23.51 | 23.55 |
|           | 5 | 23.28 | 23.82 | 23.78 | 23.80 | 23.87 |
| 69020     | 2 | 23.92 | 23.91 | 23.89 | 23.90 | 23.90 |
| (481×321) | 3 | 24.36 | 24.34 | 24.33 | 24.34 | 24.34 |
|           | 4 | 24.48 | 24.43 | 24.40 | 24.46 | 24.46 |
|           | 5 | 24.59 | 24.51 | 24.47 | 24.58 | 24.58 |
| 85048     | 2 | 22.69 | 22.68 | 22.67 | 22.68 | 22.68 |
| (481×321) | 3 | 23.04 | 23.01 | 22.98 | 23.02 | 23.02 |
|           | 4 | 23.35 | 23.29 | 23.27 | 23.33 | 23.33 |
|           | 5 | 23.52 | 23.48 | 23.45 | 23.48 | 23.48 |
| 87046     | 2 | 23.24 | 23.23 | 23.22 | 23.23 | 23.23 |
| (481×321) | 3 | 23.44 | 23.38 | 23.36 | 23.42 | 23.42 |
|           | 4 | 23.61 | 23.56 | 23.55 | 23.58 | 23.58 |
|           | 5 | 23.69 | 23.65 | 23.62 | 23.65 | 23.65 |

Table 5 Structural Similarity Index (SSIM) of different segmented images using various algorithm

| Image ID  | level | Our algorithm | BA   | MMSA | IBA  | OTSU |
|-----------|-------|---------------|------|------|------|------|
| 101085    | 2     | 0.50          | 0.48 | 0.47 | 0.49 | 0.48 |
| (321×481) | 3     | 0.75          | 0.73 | 0.74 | 0.72 | 0.74 |
|           | 4     | 0.86          | 0.83 | 0.85 | 0.85 | 0.83 |
|           | 5     | 0.89          | 0.86 | 0.87 | 0.86 | 0.88 |
| 119082    | 2     | 0.73          | 0.70 | 0.71 | 0.72 | 0.72 |
| (481×321) | 3     | 0.82          | 0.80 | 0.81 | 0.81 | 0.82 |
|           | 4     | 0.88          | 0.87 | 0.86 | 0.87 | 0.88 |
|           | 5     | 0.91          | 0.89 | 0.88 | 0.88 | 0.90 |
| 126007    | 2     | 0.41          | 0.39 | 0.40 | 0.39 | 0.41 |
| (481×321) | 3     | 0.66          | 0.63 | 0.64 | 0.65 | 0.66 |
|           | 4     | 0.72          | 0.69 | 0.69 | 0.70 | 0.71 |
|           | 5     | 0.80          | 0.78 | 0.78 | 0.79 | 0.79 |

|           |   |      |      |      |      |      |
|-----------|---|------|------|------|------|------|
| 156065    | 2 | 0.59 | 0.57 | 0.57 | 0.58 | 0.57 |
| (481×321) | 3 | 0.69 | 0.67 | 0.68 | 0.67 | 0.68 |
|           | 4 | 0.76 | 0.72 | 0.73 | 0.75 | 0.74 |
|           | 5 | 0.87 | 0.83 | 0.85 | 0.86 | 0.86 |
| 157055    | 2 | 0.70 | 0.68 | 0.68 | 0.69 | 0.70 |
| (481×321) | 3 | 0.75 | 0.74 | 0.73 | 0.73 | 0.74 |
|           | 4 | 0.80 | 0.77 | 0.77 | 0.78 | 0.78 |
|           | 5 | 0.86 | 0.84 | 0.83 | 0.83 | 0.85 |
| 16077     | 2 | 0.65 | 0.63 | 0.64 | 0.64 | 0.64 |
| (481×321) | 3 | 0.80 | 0.78 | 0.79 | 0.77 | 0.78 |
|           | 4 | 0.88 | 0.85 | 0.85 | 0.87 | 0.86 |
|           | 5 | 0.96 | 0.92 | 0.92 | 0.95 | 0.96 |
| 163085    | 2 | 0.39 | 0.38 | 0.38 | 0.38 | 0.38 |
| (481×321) | 3 | 0.48 | 0.45 | 0.47 | 0.46 | 0.48 |
|           | 4 | 0.56 | 0.52 | 0.52 | 0.51 | 0.55 |
|           | 5 | 0.74 | 0.72 | 0.71 | 0.73 | 0.73 |
| 167062    | 2 | 0.78 | 0.76 | 0.75 | 0.75 | 0.76 |
| (481×321) | 3 | 0.86 | 0.84 | 0.83 | 0.85 | 0.84 |
|           | 4 | 0.94 | 0.91 | 0.91 | 0.92 | 0.93 |
|           | 5 | 0.96 | 0.96 | 0.95 | 0.96 | 0.96 |
| 170057    | 2 | 0.42 | 0.40 | 0.40 | 0.40 | 0.42 |
| (481×321) | 3 | 0.50 | 0.48 | 0.48 | 0.48 | 0.48 |
|           | 4 | 0.67 | 0.63 | 0.65 | 0.63 | 0.64 |
|           | 5 | 0.74 | 0.70 | 0.69 | 0.72 | 0.70 |
| 175032    | 2 | 0.47 | 0.44 | 0.46 | 0.46 | 0.47 |
| (321×481) | 3 | 0.57 | 0.55 | 0.55 | 0.55 | 0.56 |
|           | 4 | 0.69 | 0.67 | 0.67 | 0.67 | 0.68 |
|           | 5 | 0.73 | 0.70 | 0.71 | 0.72 | 0.72 |
| 219090    | 2 | 0.62 | 0.59 | 0.60 | 0.60 | 0.60 |
| (481×321) | 3 | 0.66 | 0.64 | 0.63 | 0.65 | 0.64 |
|           | 4 | 0.78 | 0.74 | 0.76 | 0.75 | 0.78 |
|           | 5 | 0.87 | 0.83 | 0.83 | 0.85 | 0.85 |
| 220075    | 2 | 0.60 | 0.59 | 0.59 | 0.58 | 0.60 |
| (481×321) | 3 | 0.64 | 0.63 | 0.62 | 0.62 | 0.64 |
|           | 4 | 0.73 | 0.71 | 0.72 | 0.71 | 0.71 |
|           | 5 | 0.80 | 0.76 | 0.79 | 0.77 | 0.77 |
| 24077     | 2 | 0.79 | 0.79 | 0.78 | 0.78 | 0.78 |
| (481×321) | 3 | 0.84 | 0.83 | 0.83 | 0.84 | 0.82 |
|           | 4 | 0.88 | 0.86 | 0.86 | 0.85 | 0.86 |
|           | 5 | 0.94 | 0.93 | 0.93 | 0.92 | 0.93 |
| 295087    | 2 | 0.43 | 0.41 | 0.40 | 0.42 | 0.42 |
| (481×321) | 3 | 0.53 | 0.52 | 0.51 | 0.51 | 0.53 |
|           | 4 | 0.58 | 0.55 | 0.56 | 0.55 | 0.58 |
|           | 5 | 0.71 | 0.68 | 0.70 | 0.70 | 0.70 |

|           |   |      |      |      |      |      |
|-----------|---|------|------|------|------|------|
| 296007    | 2 | 0.38 | 0.36 | 0.37 | 0.37 | 0.37 |
| (481×321) | 3 | 0.44 | 0.43 | 0.43 | 0.42 | 0.44 |
|           | 4 | 0.56 | 0.54 | 0.54 | 0.53 | 0.55 |
|           | 5 | 0.68 | 0.65 | 0.65 | 0.65 | 0.66 |
| 300091    | 2 | 0.50 | 0.47 | 0.49 | 0.46 | 0.50 |
| (481×321) | 3 | 0.63 | 0.61 | 0.61 | 0.62 | 0.63 |
|           | 4 | 0.75 | 0.72 | 0.74 | 0.71 | 0.74 |
|           | 5 | 0.82 | 0.80 | 0.81 | 0.81 | 0.81 |
| 38092     | 2 | 0.68 | 0.65 | 0.66 | 0.65 | 0.68 |
| (481×321) | 3 | 0.86 | 0.83 | 0.85 | 0.84 | 0.84 |
|           | 4 | 0.93 | 0.89 | 0.88 | 0.92 | 0.91 |
|           | 5 | 0.95 | 0.91 | 0.92 | 0.93 | 0.94 |
| 42049     | 2 | 0.76 | 0.75 | 0.76 | 0.76 | 0.76 |
| (481×321) | 3 | 0.83 | 0.82 | 0.81 | 0.82 | 0.83 |
|           | 4 | 0.92 | 0.92 | 0.91 | 0.92 | 0.92 |
|           | 5 | 0.97 | 0.95 | 0.96 | 0.96 | 0.97 |
| 43074     | 2 | 0.38 | 0.37 | 0.36 | 0.36 | 0.37 |
| (481×321) | 3 | 0.60 | 0.59 | 0.58 | 0.59 | 0.60 |
|           | 4 | 0.64 | 0.62 | 0.62 | 0.62 | 0.62 |
|           | 5 | 0.76 | 0.72 | 0.71 | 0.71 | 0.73 |
| 45096     | 2 | 0.66 | 0.63 | 0.62 | 0.64 | 0.65 |
| (481×321) | 3 | 0.77 | 0.74 | 0.75 | 0.76 | 0.77 |
|           | 4 | 0.83 | 0.81 | 0.82 | 0.81 | 0.82 |
|           | 5 | 0.88 | 0.86 | 0.87 | 0.85 | 0.87 |
| 58060     | 2 | 0.62 | 0.61 | 0.61 | 0.60 | 0.61 |
| (481×321) | 3 | 0.78 | 0.77 | 0.76 | 0.77 | 0.78 |
|           | 4 | 0.86 | 0.83 | 0.82 | 0.85 | 0.85 |
|           | 5 | 0.95 | 0.93 | 0.94 | 0.93 | 0.94 |
| 76053     | 2 | 0.43 | 0.42 | 0.41 | 0.42 | 0.43 |
| (481×321) | 3 | 0.65 | 0.62 | 0.62 | 0.63 | 0.62 |
|           | 4 | 0.72 | 0.69 | 0.71 | 0.68 | 0.70 |
|           | 5 | 0.74 | 0.70 | 0.73 | 0.73 | 0.72 |
| 78004     | 2 | 0.74 | 0.71 | 0.71 | 0.72 | 0.72 |
| (321×481) | 3 | 0.82 | 0.81 | 0.81 | 0.81 | 0.82 |
|           | 4 | 0.87 | 0.85 | 0.86 | 0.86 | 0.86 |
|           | 5 | 0.92 | 0.88 | 0.87 | 0.89 | 0.88 |
| 86000     | 2 | 0.51 | 0.48 | 0.49 | 0.47 | 0.50 |
| (321×481) | 3 | 0.59 | 0.56 | 0.58 | 0.56 | 0.59 |
|           | 4 | 0.64 | 0.61 | 0.60 | 0.61 | 0.61 |
|           | 5 | 0.67 | 0.63 | 0.65 | 0.65 | 0.67 |
| 89072     | 2 | 0.62 | 0.62 | 0.62 | 0.62 | 0.62 |
| (321×481) | 3 | 0.76 | 0.75 | 0.74 | 0.75 | 0.74 |
|           | 4 | 0.82 | 0.81 | 0.80 | 0.81 | 0.82 |
|           | 5 | 0.88 | 0.87 | 0.86 | 0.87 | 0.87 |

|           |   |      |      |      |      |      |
|-----------|---|------|------|------|------|------|
| 103070    | 2 | 0.55 | 0.52 | 0.51 | 0.54 | 0.53 |
| (481×321) | 3 | 0.62 | 0.59 | 0.58 | 0.60 | 0.61 |
|           | 4 | 0.68 | 0.65 | 0.66 | 0.67 | 0.68 |
|           | 5 | 0.72 | 0.68 | 0.70 | 0.70 | 0.69 |
| 108082    | 2 | 0.54 | 0.51 | 0.52 | 0.50 | 0.54 |
| (481×321) | 3 | 0.78 | 0.75 | 0.76 | 0.74 | 0.78 |
|           | 4 | 0.84 | 0.81 | 0.83 | 0.83 | 0.82 |
|           | 5 | 0.91 | 0.87 | 0.90 | 0.88 | 0.91 |
| 109053    | 2 | 0.42 | 0.40 | 0.40 | 0.41 | 0.42 |
| (481×321) | 3 | 0.57 | 0.55 | 0.55 | 0.56 | 0.57 |
|           | 4 | 0.69 | 0.65 | 0.65 | 0.65 | 0.66 |
|           | 5 | 0.75 | 0.71 | 0.73 | 0.70 | 0.71 |
| 12084     | 2 | 0.40 | 0.39 | 0.39 | 0.38 | 0.40 |
| (481×321) | 3 | 0.61 | 0.58 | 0.60 | 0.59 | 0.61 |
|           | 4 | 0.76 | 0.74 | 0.74 | 0.74 | 0.76 |
|           | 5 | 0.84 | 0.81 | 0.82 | 0.82 | 0.84 |
| 130026    | 2 | 0.62 | 0.60 | 0.59 | 0.59 | 0.61 |
| (481×321) | 3 | 0.78 | 0.77 | 0.77 | 0.77 | 0.77 |
|           | 4 | 0.87 | 0.84 | 0.85 | 0.83 | 0.85 |
|           | 5 | 0.92 | 0.88 | 0.88 | 0.87 | 0.90 |
| 14037     | 2 | 0.52 | 0.49 | 0.49 | 0.48 | 0.50 |
| (481×321) | 3 | 0.85 | 0.84 | 0.84 | 0.83 | 0.85 |
|           | 4 | 0.90 | 0.86 | 0.89 | 0.87 | 0.90 |
|           | 5 | 0.93 | 0.91 | 0.91 | 0.91 | 0.93 |
| 147091    | 2 | 0.68 | 0.65 | 0.64 | 0.64 | 0.66 |
| (481×321) | 3 | 0.87 | 0.84 | 0.83 | 0.83 | 0.87 |
|           | 4 | 0.92 | 0.90 | 0.90 | 0.89 | 0.91 |
|           | 5 | 0.94 | 0.91 | 0.91 | 0.91 | 0.93 |
| 148089    | 2 | 0.70 | 0.68 | 0.68 | 0.68 | 0.69 |
| (481×321) | 3 | 0.81 | 0.79 | 0.78 | 0.79 | 0.79 |
|           | 4 | 0.85 | 0.83 | 0.84 | 0.84 | 0.84 |
|           | 5 | 0.88 | 0.86 | 0.87 | 0.87 | 0.86 |
| 167083    | 2 | 0.64 | 0.62 | 0.62 | 0.63 | 0.64 |
| (321×481) | 3 | 0.75 | 0.72 | 0.73 | 0.72 | 0.73 |
|           | 4 | 0.88 | 0.86 | 0.85 | 0.87 | 0.88 |
|           | 5 | 0.95 | 0.92 | 0.93 | 0.94 | 0.94 |
| 189080    | 2 | 0.76 | 0.75 | 0.75 | 0.75 | 0.76 |
| (321×481) | 3 | 0.88 | 0.86 | 0.85 | 0.86 | 0.86 |
|           | 4 | 0.91 | 0.88 | 0.88 | 0.87 | 0.90 |
|           | 5 | 0.94 | 0.90 | 0.92 | 0.91 | 0.94 |
| 229036    | 2 | 0.46 | 0.43 | 0.43 | 0.45 | 0.43 |
| (481×321) | 3 | 0.79 | 0.76 | 0.77 | 0.76 | 0.78 |
|           | 4 | 0.84 | 0.81 | 0.83 | 0.83 | 0.84 |
|           | 5 | 0.89 | 0.87 | 0.87 | 0.88 | 0.88 |



|           |   |      |      |      |      |      |
|-----------|---|------|------|------|------|------|
| 241004    | 2 | 0.68 | 0.65 | 0.65 | 0.67 | 0.67 |
| (481×321) | 3 | 0.74 | 0.71 | 0.71 | 0.70 | 0.74 |
|           | 4 | 0.89 | 0.86 | 0.88 | 0.88 | 0.88 |
|           | 5 | 0.92 | 0.88 | 0.90 | 0.87 | 0.89 |
| 253027    | 2 | 0.43 | 0.42 | 0.41 | 0.41 | 0.43 |
| (481×321) | 3 | 0.79 | 0.77 | 0.77 | 0.76 | 0.79 |
|           | 4 | 0.83 | 0.81 | 0.82 | 0.82 | 0.83 |
|           | 5 | 0.86 | 0.84 | 0.83 | 0.84 | 0.84 |
| 260058    | 2 | 0.38 | 0.37 | 0.37 | 0.37 | 0.37 |
| (481×321) | 3 | 0.59 | 0.58 | 0.58 | 0.58 | 0.59 |
|           | 4 | 0.71 | 0.68 | 0.69 | 0.69 | 0.69 |
|           | 5 | 0.80 | 0.76 | 0.79 | 0.76 | 0.77 |
| 271035    | 2 | 0.59 | 0.58 | 0.57 | 0.57 | 0.59 |
| (321×481) | 3 | 0.77 | 0.75 | 0.74 | 0.75 | 0.77 |
|           | 4 | 0.83 | 0.79 | 0.79 | 0.79 | 0.81 |
|           | 5 | 0.90 | 0.87 | 0.87 | 0.88 | 0.88 |
| 285079    | 2 | 0.59 | 0.56 | 0.56 | 0.58 | 0.57 |
| (321×481) | 3 | 0.70 | 0.69 | 0.69 | 0.69 | 0.70 |
|           | 4 | 0.77 | 0.73 | 0.75 | 0.74 | 0.74 |
|           | 5 | 0.82 | 0.79 | 0.81 | 0.79 | 0.80 |
| 291000    | 2 | 0.49 | 0.48 | 0.48 | 0.47 | 0.48 |
| (481×321) | 3 | 0.69 | 0.67 | 0.67 | 0.68 | 0.68 |
|           | 4 | 0.80 | 0.77 | 0.78 | 0.78 | 0.80 |
|           | 5 | 0.89 | 0.85 | 0.88 | 0.84 | 0.89 |
| 304034    | 2 | 0.41 | 0.40 | 0.40 | 0.40 | 0.41 |
| (481×321) | 3 | 0.65 | 0.64 | 0.64 | 0.64 | 0.64 |
|           | 4 | 0.77 | 0.75 | 0.76 | 0.76 | 0.75 |
|           | 5 | 0.86 | 0.84 | 0.85 | 0.83 | 0.85 |
| 41033     | 2 | 0.70 | 0.69 | 0.68 | 0.69 | 0.70 |
| (481×321) | 3 | 0.73 | 0.70 | 0.72 | 0.71 | 0.70 |
|           | 4 | 0.82 | 0.78 | 0.78 | 0.80 | 0.82 |
|           | 5 | 0.85 | 0.81 | 0.82 | 0.81 | 0.84 |
| 54082     | 2 | 0.32 | 0.31 | 0.31 | 0.31 | 0.30 |
| (321×481) | 3 | 0.38 | 0.37 | 0.37 | 0.37 | 0.36 |
|           | 4 | 0.60 | 0.59 | 0.59 | 0.58 | 0.56 |
|           | 5 | 0.92 | 0.91 | 0.91 | 0.91 | 0.90 |
| 62096     | 2 | 0.81 | 0.78 | 0.80 | 0.79 | 0.78 |
| (481×321) | 3 | 0.89 | 0.87 | 0.88 | 0.87 | 0.87 |
|           | 4 | 0.94 | 0.90 | 0.91 | 0.92 | 0.94 |
|           | 5 | 0.95 | 0.91 | 0.93 | 0.92 | 0.92 |
| 69015     | 2 | 0.44 | 0.42 | 0.43 | 0.41 | 0.44 |
| (321×481) | 3 | 0.73 | 0.71 | 0.70 | 0.70 | 0.71 |
|           | 4 | 0.80 | 0.76 | 0.78 | 0.79 | 0.80 |
|           | 5 | 0.83 | 0.80 | 0.82 | 0.81 | 0.82 |

|           |   |      |      |      |      |      |
|-----------|---|------|------|------|------|------|
| 69040     | 2 | 0.38 | 0.36 | 0.36 | 0.37 | 0.38 |
| (481×321) | 3 | 0.55 | 0.53 | 0.52 | 0.52 | 0.53 |
|           | 4 | 0.66 | 0.64 | 0.63 | 0.63 | 0.66 |
|           | 5 | 0.73 | 0.69 | 0.71 | 0.70 | 0.71 |
| 8023      | 2 | 0.32 | 0.30 | 0.31 | 0.30 | 0.31 |
| (481×321) | 3 | 0.54 | 0.51 | 0.52 | 0.50 | 0.54 |
|           | 4 | 0.62 | 0.58 | 0.61 | 0.60 | 0.62 |
|           | 5 | 0.64 | 0.60 | 0.62 | 0.63 | 0.60 |
| 86016     | 2 | 0.54 | 0.54 | 0.54 | 0.54 | 0.54 |
| (481×321) | 3 | 0.66 | 0.65 | 0.64 | 0.64 | 0.66 |
|           | 4 | 0.73 | 0.73 | 0.71 | 0.71 | 0.73 |
|           | 5 | 0.92 | 0.90 | 0.91 | 0.90 | 0.89 |
| 108005    | 2 | 0.51 | 0.49 | 0.49 | 0.48 | 0.50 |
| (481×321) | 3 | 0.65 | 0.62 | 0.62 | 0.63 | 0.63 |
|           | 4 | 0.72 | 0.68 | 0.68 | 0.71 | 0.72 |
|           | 5 | 0.77 | 0.74 | 0.74 | 0.73 | 0.74 |
| 108070    | 2 | 0.54 | 0.53 | 0.53 | 0.53 | 0.53 |
| (481×321) | 3 | 0.69 | 0.66 | 0.66 | 0.68 | 0.69 |
|           | 4 | 0.78 | 0.75 | 0.76 | 0.77 | 0.78 |
|           | 5 | 0.82 | 0.78 | 0.79 | 0.78 | 0.79 |
| 123074    | 2 | 0.50 | 0.47 | 0.48 | 0.47 | 0.50 |
| (481×321) | 3 | 0.66 | 0.63 | 0.62 | 0.65 | 0.63 |
|           | 4 | 0.76 | 0.74 | 0.75 | 0.74 | 0.74 |
|           | 5 | 0.78 | 0.76 | 0.76 | 0.75 | 0.78 |
| 134035    | 2 | 0.66 | 0.65 | 0.64 | 0.64 | 0.65 |
| (481×321) | 3 | 0.70 | 0.69 | 0.68 | 0.69 | 0.69 |
|           | 4 | 0.76 | 0.74 | 0.75 | 0.73 | 0.74 |
|           | 5 | 0.78 | 0.76 | 0.75 | 0.77 | 0.77 |
| 145086    | 2 | 0.63 | 0.60 | 0.62 | 0.60 | 0.62 |
| (481×321) | 3 | 0.84 | 0.81 | 0.83 | 0.82 | 0.83 |
|           | 4 | 0.90 | 0.86 | 0.88 | 0.85 | 0.90 |
|           | 5 | 0.93 | 0.91 | 0.91 | 0.92 | 0.91 |
| 148026    | 2 | 0.80 | 0.79 | 0.78 | 0.78 | 0.80 |
| (321×481) | 3 | 0.83 | 0.80 | 0.81 | 0.80 | 0.81 |
|           | 4 | 0.92 | 0.88 | 0.90 | 0.90 | 0.88 |
|           | 5 | 0.95 | 0.92 | 0.94 | 0.92 | 0.94 |
| 160068    | 2 | 0.61 | 0.60 | 0.59 | 0.59 | 0.60 |
| (481×321) | 3 | 0.67 | 0.65 | 0.64 | 0.64 | 0.64 |
|           | 4 | 0.72 | 0.69 | 0.69 | 0.69 | 0.68 |
|           | 5 | 0.77 | 0.74 | 0.73 | 0.73 | 0.73 |
| 182053    | 2 | 0.58 | 0.56 | 0.56 | 0.57 | 0.58 |
| (481×321) | 3 | 0.85 | 0.84 | 0.84 | 0.83 | 0.84 |
|           | 4 | 0.92 | 0.90 | 0.90 | 0.90 | 0.91 |
|           | 5 | 0.97 | 0.93 | 0.94 | 0.93 | 0.97 |

|           |   |      |      |      |      |      |
|-----------|---|------|------|------|------|------|
| 19021     | 2 | 0.50 | 0.47 | 0.49 | 0.46 | 0.47 |
| (481×321) | 3 | 0.70 | 0.67 | 0.69 | 0.68 | 0.69 |
|           | 4 | 0.82 | 0.78 | 0.78 | 0.78 | 0.81 |
|           | 5 | 0.87 | 0.83 | 0.85 | 0.84 | 0.83 |
| 196073    | 2 | 0.39 | 0.38 | 0.37 | 0.38 | 0.39 |
| (481×321) | 3 | 0.56 | 0.54 | 0.54 | 0.54 | 0.55 |
|           | 4 | 0.69 | 0.67 | 0.68 | 0.68 | 0.69 |
|           | 5 | 0.77 | 0.73 | 0.72 | 0.72 | 0.73 |
| 208001    | 2 | 0.47 | 0.45 | 0.46 | 0.46 | 0.46 |
| (321×481) | 3 | 0.77 | 0.75 | 0.74 | 0.75 | 0.75 |
|           | 4 | 0.83 | 0.79 | 0.81 | 0.81 | 0.82 |
|           | 5 | 0.86 | 0.82 | 0.81 | 0.82 | 0.86 |
| 210088    | 2 | 0.47 | 0.45 | 0.45 | 0.45 | 0.47 |
| (321×481) | 3 | 0.61 | 0.59 | 0.60 | 0.59 | 0.61 |
|           | 4 | 0.68 | 0.66 | 0.67 | 0.66 | 0.66 |
|           | 5 | 0.73 | 0.70 | 0.69 | 0.72 | 0.72 |
| 21077     | 2 | 0.48 | 0.48 | 0.48 | 0.47 | 0.47 |
| (481×321) | 3 | 0.73 | 0.72 | 0.71 | 0.71 | 0.71 |
|           | 4 | 0.89 | 0.88 | 0.88 | 0.87 | 0.87 |
|           | 5 | 0.93 | 0.92 | 0.92 | 0.91 | 0.91 |
| 216081    | 2 | 0.66 | 0.65 | 0.64 | 0.64 | 0.65 |
| (481×321) | 3 | 0.72 | 0.70 | 0.69 | 0.69 | 0.70 |
|           | 4 | 0.85 | 0.83 | 0.84 | 0.82 | 0.83 |
|           | 5 | 0.91 | 0.87 | 0.87 | 0.90 | 0.87 |
| 223061    | 2 | 0.69 | 0.68 | 0.68 | 0.68 | 0.69 |
| (481×321) | 3 | 0.77 | 0.75 | 0.76 | 0.75 | 0.76 |
|           | 4 | 0.85 | 0.83 | 0.83 | 0.82 | 0.85 |
|           | 5 | 0.93 | 0.91 | 0.92 | 0.90 | 0.93 |
| 227092    | 2 | 0.36 | 0.33 | 0.34 | 0.33 | 0.36 |
| (321×481) | 3 | 0.57 | 0.54 | 0.56 | 0.54 | 0.57 |
|           | 4 | 0.66 | 0.63 | 0.62 | 0.62 | 0.63 |
|           | 5 | 0.70 | 0.67 | 0.69 | 0.69 | 0.68 |
| 253055    | 2 | 0.41 | 0.38 | 0.40 | 0.39 | 0.39 |
| (481×321) | 3 | 0.77 | 0.74 | 0.76 | 0.76 | 0.74 |
|           | 4 | 0.91 | 0.88 | 0.90 | 0.90 | 0.88 |
|           | 5 | 0.94 | 0.92 | 0.93 | 0.92 | 0.94 |
| 306005    | 2 | 0.69 | 0.66 | 0.68 | 0.68 | 0.67 |
| (481×321) | 3 | 0.84 | 0.83 | 0.83 | 0.83 | 0.83 |
|           | 4 | 0.87 | 0.84 | 0.86 | 0.86 | 0.85 |
|           | 5 | 0.91 | 0.87 | 0.89 | 0.88 | 0.88 |
| 3096      | 2 | 0.47 | 0.45 | 0.45 | 0.45 | 0.47 |
| (481×321) | 3 | 0.65 | 0.64 | 0.64 | 0.64 | 0.65 |
|           | 4 | 0.75 | 0.72 | 0.74 | 0.72 | 0.72 |
|           | 5 | 0.83 | 0.79 | 0.82 | 0.79 | 0.81 |

|           |   |      |      |      |      |      |
|-----------|---|------|------|------|------|------|
| 33039     | 2 | 0.64 | 0.61 | 0.63 | 0.63 | 0.64 |
| (321×481) | 3 | 0.75 | 0.72 | 0.72 | 0.72 | 0.72 |
|           | 4 | 0.82 | 0.79 | 0.81 | 0.79 | 0.82 |
|           | 5 | 0.86 | 0.82 | 0.83 | 0.82 | 0.82 |
| 376043    | 2 | 0.45 | 0.44 | 0.43 | 0.43 | 0.45 |
| (321×481) | 3 | 0.68 | 0.65 | 0.64 | 0.66 | 0.66 |
|           | 4 | 0.79 | 0.77 | 0.76 | 0.77 | 0.79 |
|           | 5 | 0.81 | 0.78 | 0.79 | 0.80 | 0.81 |
| 38082     | 2 | 0.41 | 0.38 | 0.40 | 0.38 | 0.41 |
| (481×321) | 3 | 0.61 | 0.60 | 0.59 | 0.60 | 0.61 |
|           | 4 | 0.72 | 0.68 | 0.71 | 0.71 | 0.69 |
|           | 5 | 0.78 | 0.75 | 0.76 | 0.77 | 0.78 |
| 41069     | 2 | 0.49 | 0.47 | 0.46 | 0.46 | 0.49 |
| (481×321) | 3 | 0.69 | 0.68 | 0.68 | 0.68 | 0.69 |
|           | 4 | 0.85 | 0.82 | 0.82 | 0.82 | 0.85 |
|           | 5 | 0.89 | 0.85 | 0.84 | 0.88 | 0.85 |
| 86068     | 2 | 0.37 | 0.34 | 0.34 | 0.35 | 0.36 |
| (481×321) | 3 | 0.69 | 0.67 | 0.67 | 0.67 | 0.68 |
|           | 4 | 0.77 | 0.76 | 0.75 | 0.75 | 0.77 |
|           | 5 | 0.81 | 0.79 | 0.78 | 0.78 | 0.79 |
| 97033     | 2 | 0.66 | 0.65 | 0.64 | 0.65 | 0.66 |
| (481×321) | 3 | 0.81 | 0.79 | 0.78 | 0.80 | 0.81 |
|           | 4 | 0.86 | 0.84 | 0.85 | 0.83 | 0.84 |
|           | 5 | 0.93 | 0.90 | 0.92 | 0.92 | 0.92 |
| 101087    | 2 | 0.70 | 0.69 | 0.68 | 0.68 | 0.70 |
| (321×481) | 3 | 0.83 | 0.80 | 0.82 | 0.80 | 0.81 |
|           | 4 | 0.90 | 0.88 | 0.89 | 0.87 | 0.89 |
|           | 5 | 0.94 | 0.92 | 0.93 | 0.92 | 0.94 |
| 102061    | 2 | 0.62 | 0.61 | 0.61 | 0.61 | 0.61 |
| (321×481) | 3 | 0.78 | 0.77 | 0.77 | 0.76 | 0.77 |
|           | 4 | 0.85 | 0.82 | 0.82 | 0.82 | 0.83 |
|           | 5 | 0.88 | 0.85 | 0.87 | 0.85 | 0.85 |
| 105025    | 2 | 0.63 | 0.60 | 0.61 | 0.60 | 0.61 |
| (481×321) | 3 | 0.74 | 0.72 | 0.73 | 0.71 | 0.73 |
|           | 4 | 0.84 | 0.81 | 0.82 | 0.82 | 0.83 |
|           | 5 | 0.90 | 0.86 | 0.89 | 0.87 | 0.86 |
| 106024    | 2 | 0.68 | 0.66 | 0.66 | 0.67 | 0.66 |
| (481×321) | 3 | 0.77 | 0.76 | 0.76 | 0.76 | 0.77 |
|           | 4 | 0.82 | 0.78 | 0.81 | 0.78 | 0.81 |
|           | 5 | 0.85 | 0.82 | 0.82 | 0.82 | 0.83 |
| 143090    | 2 | 0.50 | 0.48 | 0.47 | 0.49 | 0.49 |
| (481×321) | 3 | 0.66 | 0.63 | 0.65 | 0.64 | 0.65 |
|           | 4 | 0.78 | 0.76 | 0.76 | 0.77 | 0.77 |
|           | 5 | 0.81 | 0.77 | 0.80 | 0.78 | 0.78 |

|           |   |      |      |      |      |      |
|-----------|---|------|------|------|------|------|
| 159008    | 2 | 0.74 | 0.72 | 0.73 | 0.73 | 0.74 |
| (481×321) | 3 | 0.81 | 0.79 | 0.79 | 0.80 | 0.81 |
|           | 4 | 0.89 | 0.85 | 0.87 | 0.85 | 0.88 |
|           | 5 | 0.93 | 0.90 | 0.91 | 0.92 | 0.90 |
| 175043    | 2 | 0.43 | 0.42 | 0.42 | 0.41 | 0.43 |
| (481×321) | 3 | 0.65 | 0.64 | 0.63 | 0.63 | 0.64 |
|           | 4 | 0.72 | 0.70 | 0.71 | 0.71 | 0.72 |
|           | 5 | 0.75 | 0.71 | 0.74 | 0.74 | 0.73 |
| 197017    | 2 | 0.71 | 0.69 | 0.70 | 0.69 | 0.71 |
| (481×321) | 3 | 0.78 | 0.76 | 0.75 | 0.76 | 0.76 |
|           | 4 | 0.86 | 0.84 | 0.83 | 0.85 | 0.85 |
|           | 5 | 0.91 | 0.88 | 0.90 | 0.90 | 0.90 |
| 236037    | 2 | 0.42 | 0.40 | 0.41 | 0.41 | 0.42 |
| (481×321) | 3 | 0.57 | 0.56 | 0.56 | 0.56 | 0.57 |
|           | 4 | 0.69 | 0.65 | 0.67 | 0.67 | 0.69 |
|           | 5 | 0.76 | 0.72 | 0.72 | 0.72 | 0.75 |
| 241048    | 2 | 0.59 | 0.58 | 0.57 | 0.58 | 0.58 |
| (481×321) | 3 | 0.71 | 0.69 | 0.68 | 0.70 | 0.69 |
|           | 4 | 0.82 | 0.80 | 0.81 | 0.80 | 0.82 |
|           | 5 | 0.90 | 0.88 | 0.88 | 0.87 | 0.88 |
| 296059    | 2 | 0.53 | 0.52 | 0.52 | 0.52 | 0.52 |
| (481×321) | 3 | 0.69 | 0.67 | 0.68 | 0.68 | 0.69 |
|           | 4 | 0.76 | 0.72 | 0.75 | 0.74 | 0.76 |
|           | 5 | 0.79 | 0.76 | 0.77 | 0.75 | 0.76 |
| 299086    | 2 | 0.29 | 0.28 | 0.28 | 0.28 | 0.29 |
| (481×321) | 3 | 0.43 | 0.41 | 0.40 | 0.41 | 0.43 |
|           | 4 | 0.52 | 0.48 | 0.48 | 0.47 | 0.52 |
|           | 5 | 0.61 | 0.59 | 0.60 | 0.59 | 0.61 |
| 302008    | 2 | 0.78 | 0.77 | 0.76 | 0.76 | 0.77 |
| (321×481) | 3 | 0.83 | 0.82 | 0.81 | 0.82 | 0.83 |
|           | 4 | 0.86 | 0.83 | 0.85 | 0.84 | 0.84 |
|           | 5 | 0.88 | 0.84 | 0.84 | 0.87 | 0.88 |
| 304074    | 2 | 0.55 | 0.54 | 0.55 | 0.54 | 0.54 |
| (321×481) | 3 | 0.69 | 0.65 | 0.66 | 0.65 | 0.66 |
|           | 4 | 0.78 | 0.75 | 0.77 | 0.76 | 0.77 |
|           | 5 | 0.86 | 0.82 | 0.83 | 0.82 | 0.82 |
| 351093    | 2 | 0.85 | 0.83 | 0.84 | 0.82 | 0.83 |
| (481×321) | 3 | 0.90 | 0.87 | 0.89 | 0.89 | 0.89 |
|           | 4 | 0.92 | 0.88 | 0.91 | 0.89 | 0.92 |
|           | 5 | 0.93 | 0.89 | 0.92 | 0.89 | 0.89 |
| 361010    | 2 | 0.34 | 0.31 | 0.31 | 0.32 | 0.32 |
| (481×321) | 3 | 0.47 | 0.45 | 0.45 | 0.46 | 0.47 |
|           | 4 | 0.63 | 0.59 | 0.61 | 0.61 | 0.61 |
|           | 5 | 0.81 | 0.77 | 0.80 | 0.79 | 0.77 |

|           |   |      |      |      |      |      |
|-----------|---|------|------|------|------|------|
| 37073     | 2 | 0.33 | 0.32 | 0.32 | 0.31 | 0.32 |
| (481×321) | 3 | 0.66 | 0.65 | 0.64 | 0.64 | 0.65 |
|           | 4 | 0.82 | 0.80 | 0.80 | 0.80 | 0.81 |
|           | 5 | 0.89 | 0.87 | 0.87 | 0.87 | 0.88 |
| 385039    | 2 | 0.72 | 0.69 | 0.68 | 0.68 | 0.72 |
| (481×321) | 3 | 0.82 | 0.81 | 0.81 | 0.81 | 0.82 |
|           | 4 | 0.85 | 0.83 | 0.84 | 0.84 | 0.83 |
|           | 5 | 0.88 | 0.87 | 0.87 | 0.87 | 0.87 |
| 42012     | 2 | 0.63 | 0.61 | 0.62 | 0.61 | 0.61 |
| (321×481) | 3 | 0.81 | 0.80 | 0.79 | 0.79 | 0.80 |
|           | 4 | 0.85 | 0.82 | 0.82 | 0.83 | 0.84 |
|           | 5 | 0.87 | 0.84 | 0.84 | 0.84 | 0.87 |
| 55073     | 2 | 0.59 | 0.56 | 0.56 | 0.57 | 0.57 |
| (321×481) | 3 | 0.77 | 0.74 | 0.73 | 0.75 | 0.75 |
|           | 4 | 0.82 | 0.80 | 0.80 | 0.80 | 0.82 |
|           | 5 | 0.85 | 0.83 | 0.84 | 0.82 | 0.85 |
| 65033     | 2 | 0.54 | 0.52 | 0.52 | 0.51 | 0.52 |
| (481×321) | 3 | 0.68 | 0.66 | 0.67 | 0.66 | 0.68 |
|           | 4 | 0.79 | 0.76 | 0.77 | 0.77 | 0.78 |
|           | 5 | 0.83 | 0.80 | 0.82 | 0.81 | 0.83 |
| 66053     | 2 | 0.47 | 0.44 | 0.44 | 0.44 | 0.45 |
| (481×321) | 3 | 0.79 | 0.77 | 0.77 | 0.77 | 0.78 |
|           | 4 | 0.84 | 0.82 | 0.82 | 0.81 | 0.83 |
|           | 5 | 0.88 | 0.86 | 0.86 | 0.85 | 0.87 |
| 69020     | 2 | 0.35 | 0.33 | 0.33 | 0.33 | 0.34 |
| (481×321) | 3 | 0.58 | 0.57 | 0.56 | 0.56 | 0.57 |
|           | 4 | 0.71 | 0.67 | 0.70 | 0.67 | 0.71 |
|           | 5 | 0.81 | 0.77 | 0.76 | 0.78 | 0.79 |
| 85048     | 2 | 0.62 | 0.61 | 0.60 | 0.60 | 0.62 |
| (481×321) | 3 | 0.80 | 0.77 | 0.79 | 0.76 | 0.77 |
|           | 4 | 0.87 | 0.84 | 0.84 | 0.85 | 0.84 |
|           | 5 | 0.93 | 0.90 | 0.90 | 0.89 | 0.91 |
| 87046     | 2 | 0.58 | 0.55 | 0.57 | 0.55 | 0.56 |
| (481×321) | 3 | 0.69 | 0.67 | 0.68 | 0.68 | 0.68 |
|           | 4 | 0.83 | 0.79 | 0.79 | 0.79 | 0.81 |
|           | 5 | 0.92 | 0.89 | 0.89 | 0.88 | 0.90 |

Table 6 time cost of diffident methods (unit: millisecond)

| Image ID  | level | Our algorithm | BA     | MMSA   | IBA    | OTSU   |
|-----------|-------|---------------|--------|--------|--------|--------|
| 101085    | 2     | 1.54          | 1.91   | 1.79   | 1.84   | 1.67   |
| (321×481) | 3     | 2.61          | 3.04   | 2.84   | 2.93   | 2.76   |
|           | 4     | 29.48         | 33.70  | 31.97  | 32.84  | 30.84  |
|           | 5     | 186.32        | 204.92 | 199.20 | 200.88 | 195.82 |
| 119082    | 2     | 1.36          | 1.75   | 1.55   | 1.67   | 1.44   |

|           |   |        |        |        |        |        |
|-----------|---|--------|--------|--------|--------|--------|
| (481×321) | 3 | 2.53   | 2.96   | 2.78   | 2.84   | 2.71   |
|           | 4 | 26.13  | 30.42  | 28.17  | 29.20  | 26.89  |
|           | 5 | 164.25 | 181.78 | 178.32 | 179.83 | 175.58 |
| 126007    | 2 | 1.29   | 1.66   | 1.51   | 1.57   | 1.38   |
| (481×321) | 3 | 2.47   | 2.90   | 2.64   | 2.71   | 2.57   |
|           | 4 | 25.18  | 29.51  | 26.95  | 28.46  | 26.04  |
|           | 5 | 159.25 | 177.10 | 173.55 | 175.37 | 165.08 |
| 156065    | 2 | 1.43   | 1.91   | 1.67   | 1.83   | 1.51   |
| (481×321) | 3 | 2.59   | 3.13   | 2.87   | 3.02   | 2.80   |
|           | 4 | 28.36  | 33.23  | 30.37  | 32.21  | 29.08  |
|           | 5 | 176.54 | 203.21 | 185.13 | 190.86 | 181.29 |
| 157055    | 2 | 1.21   | 1.76   | 1.44   | 1.62   | 1.36   |
| (481×321) | 3 | 2.39   | 2.86   | 2.56   | 2.65   | 2.50   |
|           | 4 | 25.67  | 30.42  | 27.55  | 28.49  | 26.69  |
|           | 5 | 165.64 | 185.36 | 179.24 | 181.51 | 174.49 |
| 16077     | 2 | 1.89   | 2.29   | 2.13   | 2.20   | 2.06   |
| (481×321) | 3 | 2.92   | 3.43   | 3.16   | 3.25   | 3.02   |
|           | 4 | 31.24  | 36.02  | 33.18  | 34.39  | 32.05  |
|           | 5 | 192.31 | 219.01 | 205.69 | 207.32 | 198.66 |
| 163085    | 2 | 1.76   | 2.16   | 1.90   | 2.00   | 1.82   |
| (481×321) | 3 | 2.83   | 3.40   | 3.04   | 3.17   | 2.97   |
|           | 4 | 29.68  | 34.62  | 32.08  | 33.90  | 30.66  |
|           | 5 | 189.65 | 208.48 | 197.77 | 204.65 | 193.19 |
| 167062    | 2 | 1.56   | 1.94   | 1.75   | 1.83   | 1.62   |
| (481×321) | 3 | 2.63   | 3.08   | 2.86   | 2.93   | 2.75   |
|           | 4 | 29.35  | 34.17  | 31.62  | 33.67  | 30.15  |
|           | 5 | 181.87 | 206.57 | 194.11 | 199.23 | 190.13 |
| 170057    | 2 | 1.35   | 1.74   | 1.54   | 1.63   | 1.47   |
| (481×321) | 3 | 2.66   | 3.08   | 2.87   | 3.00   | 2.77   |
|           | 4 | 27.91  | 31.96  | 30.35  | 31.49  | 29.02  |
|           | 5 | 184.76 | 203.99 | 197.09 | 200.98 | 193.03 |
| 175032    | 2 | 1.33   | 1.73   | 1.57   | 1.68   | 1.43   |
| (321×481) | 3 | 2.61   | 3.06   | 2.80   | 2.94   | 2.73   |
|           | 4 | 26.86  | 30.88  | 29.03  | 29.96  | 27.88  |
|           | 5 | 180.42 | 208.47 | 194.70 | 200.35 | 187.80 |
| 219090    | 2 | 1.29   | 1.79   | 1.53   | 1.58   | 1.43   |
| (481×321) | 3 | 2.54   | 2.95   | 2.76   | 2.91   | 2.66   |
|           | 4 | 25.91  | 30.08  | 27.63  | 29.10  | 26.62  |
|           | 5 | 176.54 | 193.85 | 187.45 | 189.64 | 182.34 |
| 220075    | 2 | 1.67   | 2.09   | 1.90   | 1.95   | 1.82   |
| (481×321) | 3 | 2.75   | 3.32   | 2.95   | 3.17   | 2.85   |
|           | 4 | 28.61  | 32.69  | 30.51  | 32.17  | 29.42  |
|           | 5 | 187.73 | 205.62 | 199.19 | 204.46 | 194.24 |
| 24077     | 2 | 1.51   | 1.83   | 1.69   | 1.77   | 1.59   |

|           |   |        |        |        |        |        |
|-----------|---|--------|--------|--------|--------|--------|
| (481×321) | 3 | 2.43   | 2.90   | 2.73   | 2.79   | 2.63   |
|           | 4 | 29.43  | 34.12  | 31.43  | 32.64  | 30.57  |
|           | 5 | 176.89 | 193.19 | 186.27 | 182.57 | 179.95 |
| 295087    | 2 | 1.27   | 1.65   | 1.52   | 1.58   | 1.41   |
| (481×321) | 3 | 2.48   | 2.89   | 2.68   | 2.82   | 2.60   |
|           | 4 | 24.19  | 28.67  | 26.63  | 28.04  | 25.36  |
|           | 5 | 173.86 | 189.62 | 181.97 | 185.10 | 177.38 |
| 296007    | 2 | 1.63   | 2.06   | 1.81   | 1.94   | 1.71   |
| (481×321) | 3 | 2.69   | 3.24   | 2.86   | 3.06   | 2.79   |
|           | 4 | 27.44  | 32.52  | 29.39  | 30.64  | 28.18  |
|           | 5 | 185.93 | 207.38 | 196.96 | 198.68 | 193.01 |
| 300091    | 2 | 1.13   | 1.66   | 1.28   | 1.36   | 1.19   |
| (481×321) | 3 | 2.01   | 2.62   | 2.21   | 2.41   | 2.15   |
|           | 4 | 19.65  | 23.63  | 21.57  | 23.04  | 20.49  |
|           | 5 | 137.24 | 161.88 | 145.88 | 147.99 | 143.04 |
| 38092     | 2 | 1.21   | 1.72   | 1.45   | 1.52   | 1.38   |
| (481×321) | 3 | 2.19   | 2.68   | 2.46   | 2.52   | 2.38   |
|           | 4 | 29.66  | 34.68  | 32.14  | 33.30  | 30.42  |
|           | 5 | 186.58 | 202.86 | 197.68 | 199.61 | 193.86 |
| 42049     | 2 | 1.25   | 1.53   | 1.42   | 1.47   | 1.35   |
| (481×321) | 3 | 2.16   | 2.47   | 2.31   | 2.38   | 2.23   |
|           | 4 | 23.14  | 27.06  | 25.42  | 26.71  | 24.58  |
|           | 5 | 154.12 | 168.22 | 162.59 | 164.36 | 158.71 |
| 43074     | 2 | 1.37   | 1.89   | 1.60   | 1.84   | 1.45   |
| (481×321) | 3 | 2.61   | 3.15   | 2.83   | 3.05   | 2.71   |
|           | 4 | 25.73  | 30.23  | 28.21  | 29.13  | 26.89  |
|           | 5 | 173.56 | 198.79 | 186.53 | 196.45 | 179.00 |
| 45096     | 2 | 1.43   | 1.81   | 1.65   | 1.75   | 1.51   |
| (481×321) | 3 | 2.42   | 2.99   | 2.64   | 2.74   | 2.57   |
|           | 4 | 24.37  | 29.44  | 26.70  | 28.15  | 25.69  |
|           | 5 | 197.84 | 217.38 | 212.18 | 216.15 | 206.88 |
| 58060     | 2 | 1.53   | 1.97   | 1.73   | 1.89   | 1.60   |
| (481×321) | 3 | 2.89   | 3.33   | 3.11   | 3.23   | 3.01   |
|           | 4 | 31.66  | 36.09  | 33.32  | 34.62  | 32.32  |
|           | 5 | 231.83 | 258.70 | 246.79 | 255.78 | 243.16 |
| 76053     | 2 | 1.21   | 1.60   | 1.44   | 1.57   | 1.29   |
| (481×321) | 3 | 2.29   | 2.83   | 2.48   | 2.55   | 2.39   |
|           | 4 | 20.54  | 25.16  | 22.62  | 24.68  | 21.74  |
|           | 5 | 141.95 | 160.54 | 150.39 | 159.17 | 145.61 |
| 78004     | 2 | 1.38   | 1.88   | 1.55   | 1.75   | 1.44   |
| (321×481) | 3 | 2.34   | 2.80   | 2.53   | 2.60   | 2.44   |
|           | 4 | 33.64  | 38.31  | 35.43  | 37.35  | 34.39  |
|           | 5 | 229.12 | 251.70 | 237.15 | 249.67 | 232.81 |
| 86000     | 2 | 1.46   | 1.97   | 1.69   | 1.94   | 1.58   |



|           |   |        |        |        |        |        |
|-----------|---|--------|--------|--------|--------|--------|
| (321×481) | 3 | 2.51   | 2.93   | 2.79   | 2.85   | 2.68   |
|           | 4 | 28.93  | 33.16  | 31.07  | 32.41  | 30.07  |
|           | 5 | 192.54 | 217.79 | 200.53 | 207.85 | 197.28 |
| 89072     | 2 | 1.46   | 1.81   | 1.64   | 1.76   | 1.55   |
| (321×481) | 3 | 2.41   | 2.84   | 2.69   | 2.76   | 2.61   |
|           | 4 | 29.67  | 34.12  | 31.49  | 32.68  | 30.41  |
|           | 5 | 166.84 | 183.96 | 176.66 | 179.91 | 173.09 |
| 103070    | 2 | 1.86   | 2.40   | 2.06   | 2.35   | 1.99   |
| (481×321) | 3 | 3.01   | 3.52   | 3.20   | 3.30   | 3.15   |
|           | 4 | 32.64  | 37.54  | 34.51  | 35.72  | 33.43  |
|           | 5 | 247.35 | 268.62 | 258.97 | 261.13 | 253.18 |
| 108082    | 2 | 1.35   | 1.72   | 1.56   | 1.68   | 1.42   |
| (481×321) | 3 | 2.27   | 2.77   | 2.45   | 2.63   | 2.38   |
|           | 4 | 26.34  | 31.20  | 28.15  | 30.36  | 27.02  |
|           | 5 | 179.65 | 206.00 | 193.12 | 203.56 | 186.00 |
| 109053    | 2 | 1.51   | 1.96   | 1.73   | 1.91   | 1.58   |
| (481×321) | 3 | 2.59   | 3.13   | 2.87   | 3.05   | 2.75   |
|           | 4 | 29.31  | 34.22  | 31.46  | 33.29  | 30.41  |
|           | 5 | 184.83 | 204.27 | 193.37 | 202.34 | 190.59 |
| 12084     | 2 | 1.12   | 1.60   | 1.26   | 1.42   | 1.18   |
| (481×321) | 3 | 2.09   | 2.57   | 2.27   | 2.50   | 2.20   |
|           | 4 | 19.54  | 24.52  | 21.97  | 23.86  | 20.78  |
|           | 5 | 141.32 | 164.57 | 152.88 | 160.86 | 149.78 |
| 130026    | 2 | 1.35   | 1.86   | 1.55   | 1.73   | 1.45   |
| (481×321) | 3 | 2.33   | 2.82   | 2.56   | 2.67   | 2.45   |
|           | 4 | 24.36  | 28.78  | 26.00  | 28.04  | 25.00  |
|           | 5 | 166.43 | 191.54 | 180.50 | 184.02 | 169.68 |
| 14037     | 2 | 1.46   | 1.98   | 1.68   | 1.78   | 1.55   |
| (481×321) | 3 | 2.57   | 3.13   | 2.80   | 3.03   | 2.70   |
|           | 4 | 21.66  | 25.90  | 23.55  | 24.42  | 22.58  |
|           | 5 | 156.39 | 179.15 | 168.31 | 174.08 | 162.40 |
| 147091    | 2 | 1.45   | 1.97   | 1.63   | 1.78   | 1.54   |
| (481×321) | 3 | 2.77   | 3.35   | 2.93   | 3.13   | 2.88   |
|           | 4 | 31.25  | 36.27  | 33.63  | 35.51  | 32.29  |
|           | 5 | 236.45 | 259.39 | 248.70 | 257.00 | 241.15 |
| 148089    | 2 | 1.29   | 1.75   | 1.48   | 1.62   | 1.41   |
| (481×321) | 3 | 2.43   | 2.84   | 2.65   | 2.74   | 2.54   |
|           | 4 | 26.79  | 31.82  | 28.96  | 30.36  | 27.73  |
|           | 5 | 221.36 | 239.51 | 231.42 | 234.85 | 226.69 |
| 167083    | 2 | 1.74   | 2.14   | 1.89   | 2.10   | 1.81   |
| (321×481) | 3 | 2.94   | 3.50   | 3.20   | 3.41   | 3.11   |
|           | 4 | 30.21  | 35.26  | 32.54  | 34.75  | 31.16  |
|           | 5 | 229.34 | 255.02 | 239.16 | 251.32 | 233.75 |
| 189080    | 2 | 1.18   | 1.72   | 1.42   | 1.59   | 1.29   |

|           |   |        |        |        |        |        |
|-----------|---|--------|--------|--------|--------|--------|
| (321×481) | 3 | 2.11   | 2.53   | 2.31   | 2.48   | 2.23   |
|           | 4 | 21.35  | 26.35  | 23.10  | 25.68  | 22.16  |
|           | 5 | 145.62 | 169.27 | 157.27 | 159.53 | 154.25 |
| 229036    | 2 | 1.35   | 1.88   | 1.57   | 1.63   | 1.43   |
| (481×321) | 3 | 2.40   | 2.92   | 2.62   | 2.77   | 2.55   |
|           | 4 | 26.12  | 30.97  | 27.88  | 28.80  | 26.86  |
|           | 5 | 175.39 | 198.17 | 188.53 | 193.90 | 184.09 |
| 241004    | 2 | 1.43   | 1.85   | 1.64   | 1.71   | 1.54   |
| (481×321) | 3 | 2.61   | 3.19   | 2.85   | 3.01   | 2.74   |
|           | 4 | 25.39  | 29.79  | 26.89  | 28.51  | 26.05  |
|           | 5 | 171.23 | 195.95 | 183.95 | 186.25 | 174.47 |
| 253027    | 2 | 1.63   | 2.07   | 1.83   | 1.92   | 1.74   |
| (481×321) | 3 | 2.89   | 3.41   | 3.11   | 3.36   | 3.04   |
|           | 4 | 22.36  | 26.38  | 24.40  | 25.50  | 23.35  |
|           | 5 | 151.04 | 172.38 | 163.88 | 169.28 | 159.02 |
| 260058    | 2 | 1.26   | 1.81   | 1.41   | 1.52   | 1.33   |
| (481×321) | 3 | 2.19   | 2.68   | 2.44   | 2.51   | 2.29   |
|           | 4 | 24.92  | 29.40  | 27.09  | 28.58  | 26.08  |
|           | 5 | 155.34 | 179.95 | 167.30 | 173.11 | 162.81 |
| 271035    | 2 | 1.31   | 1.81   | 1.45   | 1.59   | 1.38   |
| (321×481) | 3 | 2.47   | 2.97   | 2.68   | 2.75   | 2.62   |
|           | 4 | 26.19  | 30.21  | 28.64  | 29.72  | 27.01  |
|           | 5 | 164.18 | 190.32 | 177.16 | 179.90 | 173.85 |
| 285079    | 2 | 1.67   | 2.07   | 1.87   | 1.94   | 1.80   |
| (321×481) | 3 | 2.76   | 3.26   | 2.97   | 3.09   | 2.88   |
|           | 4 | 28.31  | 33.05  | 30.28  | 32.55  | 29.04  |
|           | 5 | 176.21 | 196.34 | 185.42 | 192.20 | 179.72 |
| 291000    | 2 | 2.01   | 2.55   | 2.21   | 2.27   | 2.13   |
| (481×321) | 3 | 3.16   | 3.67   | 3.42   | 3.53   | 3.35   |
|           | 4 | 33.54  | 38.27  | 35.39  | 36.87  | 34.26  |
|           | 5 | 224.31 | 244.99 | 239.13 | 243.45 | 236.43 |
| 304034    | 2 | 1.31   | 1.68   | 1.51   | 1.60   | 1.39   |
| (481×321) | 3 | 2.40   | 2.83   | 2.61   | 2.73   | 2.51   |
|           | 4 | 29.08  | 33.38  | 30.61  | 32.55  | 29.71  |
|           | 5 | 180.51 | 207.02 | 194.64 | 205.37 | 191.48 |
| 41033     | 2 | 1.07   | 1.55   | 1.23   | 1.37   | 1.14   |
| (481×321) | 3 | 1.78   | 2.29   | 1.97   | 2.06   | 1.88   |
|           | 4 | 17.25  | 22.17  | 19.77  | 21.67  | 18.00  |
|           | 5 | 134.39 | 155.91 | 142.72 | 146.17 | 138.05 |
| 54082     | 2 | 1.41   | 1.76   | 1.61   | 1.68   | 1.52   |
| (321×481) | 3 | 2.34   | 2.79   | 2.63   | 2.70   | 2.52   |
|           | 4 | 28.62  | 32.55  | 30.06  | 31.43  | 29.59  |
|           | 5 | 164.59 | 180.64 | 174.01 | 177.39 | 170.42 |
| 62096     | 2 | 1.34   | 1.83   | 1.58   | 1.67   | 1.43   |

|           |   |        |        |        |        |        |
|-----------|---|--------|--------|--------|--------|--------|
| (481×321) | 3 | 2.47   | 2.89   | 2.73   | 2.82   | 2.61   |
|           | 4 | 26.34  | 30.72  | 27.90  | 29.57  | 27.07  |
|           | 5 | 176.48 | 201.16 | 187.21 | 195.06 | 179.60 |
| 69015     | 2 | 1.23   | 1.76   | 1.42   | 1.60   | 1.30   |
| (321×481) | 3 | 2.33   | 2.90   | 2.50   | 2.85   | 2.44   |
|           | 4 | 24.35  | 29.01  | 25.89  | 28.16  | 25.03  |
|           | 5 | 165.58 | 188.07 | 178.29 | 182.36 | 170.36 |
| 69040     | 2 | 1.56   | 1.98   | 1.73   | 1.86   | 1.62   |
| (481×321) | 3 | 2.70   | 3.27   | 2.94   | 3.19   | 2.87   |
|           | 4 | 28.94  | 33.94  | 31.12  | 33.23  | 29.75  |
|           | 5 | 188.11 | 215.90 | 197.62 | 212.91 | 191.96 |
| 8023      | 2 | 1.54   | 2.09   | 1.68   | 1.94   | 1.60   |
| (481×321) | 3 | 2.62   | 3.09   | 2.82   | 2.99   | 2.73   |
|           | 4 | 26.87  | 31.68  | 29.27  | 30.30  | 28.20  |
|           | 5 | 190.76 | 214.80 | 203.38 | 212.62 | 193.98 |
| 86016     | 2 | 1.34   | 1.61   | 1.48   | 1.51   | 1.40   |
| (481×321) | 3 | 2.21   | 2.51   | 2.37   | 2.43   | 2.31   |
|           | 4 | 25.16  | 29.45  | 27.64  | 28.85  | 26.74  |
|           | 5 | 159.54 | 176.21 | 167.66 | 171.65 | 164.39 |
| 108005    | 2 | 1.28   | 1.64   | 1.45   | 1.52   | 1.38   |
| (481×321) | 3 | 2.19   | 2.62   | 2.35   | 2.43   | 2.30   |
|           | 4 | 22.34  | 27.32  | 24.74  | 26.21  | 23.08  |
|           | 5 | 154.14 | 172.92 | 166.55 | 169.69 | 163.46 |
| 108070    | 2 | 1.35   | 1.89   | 1.56   | 1.77   | 1.42   |
| (481×321) | 3 | 2.20   | 2.77   | 2.42   | 2.58   | 2.33   |
|           | 4 | 23.70  | 28.53  | 25.77  | 27.53  | 24.84  |
|           | 5 | 173.01 | 199.32 | 185.80 | 193.78 | 181.83 |
| 123074    | 2 | 1.49   | 1.90   | 1.68   | 1.80   | 1.57   |
| (481×321) | 3 | 2.34   | 2.95   | 2.58   | 2.64   | 2.46   |
|           | 4 | 27.64  | 32.30  | 30.03  | 31.25  | 28.50  |
|           | 5 | 196.24 | 219.02 | 210.37 | 216.74 | 200.52 |
| 134035    | 2 | 1.37   | 1.82   | 1.56   | 1.66   | 1.48   |
| (481×321) | 3 | 2.31   | 2.80   | 2.47   | 2.71   | 2.42   |
|           | 4 | 26.87  | 30.88  | 29.06  | 30.03  | 27.84  |
|           | 5 | 185.40 | 204.89 | 193.38 | 199.53 | 190.23 |
| 145086    | 2 | 1.41   | 1.89   | 1.61   | 1.78   | 1.51   |
| (481×321) | 3 | 2.38   | 2.83   | 2.54   | 2.65   | 2.49   |
|           | 4 | 24.38  | 29.25  | 26.36  | 27.56  | 25.53  |
|           | 5 | 160.91 | 179.26 | 172.77 | 177.97 | 165.16 |
| 148026    | 2 | 1.59   | 2.09   | 1.76   | 1.99   | 1.65   |
| (321×481) | 3 | 2.63   | 3.12   | 2.86   | 2.95   | 2.74   |
|           | 4 | 30.14  | 35.04  | 31.73  | 32.98  | 30.81  |
|           | 5 | 217.01 | 243.18 | 226.54 | 231.38 | 223.81 |
| 160068    | 2 | 1.49   | 1.79   | 1.63   | 1.72   | 1.54   |

|           |   |        |        |        |        |        |
|-----------|---|--------|--------|--------|--------|--------|
| (481×321) | 3 | 2.38   | 2.81   | 2.66   | 2.72   | 2.58   |
|           | 4 | 29.14  | 33.45  | 30.94  | 32.09  | 30.17  |
|           | 5 | 166.01 | 182.73 | 176.10 | 178.93 | 172.23 |
| 182053    | 2 | 1.51   | 1.94   | 1.74   | 1.84   | 1.65   |
| (481×321) | 3 | 2.66   | 3.07   | 2.82   | 2.88   | 2.76   |
|           | 4 | 28.47  | 33.46  | 30.44  | 32.51  | 29.13  |
|           | 5 | 209.80 | 229.32 | 218.15 | 226.91 | 214.83 |
| 19021     | 2 | 1.28   | 1.75   | 1.48   | 1.58   | 1.41   |
| (481×321) | 3 | 2.31   | 2.87   | 2.47   | 2.77   | 2.42   |
|           | 4 | 25.64  | 30.48  | 27.86  | 28.84  | 26.34  |
|           | 5 | 174.35 | 198.05 | 185.69 | 189.83 | 178.66 |
| 196073    | 2 | 1.47   | 1.85   | 1.64   | 1.72   | 1.54   |
| (481×321) | 3 | 2.40   | 2.95   | 2.60   | 2.77   | 2.51   |
|           | 4 | 26.58  | 31.19  | 28.10  | 29.48  | 27.27  |
|           | 5 | 185.91 | 201.18 | 197.43 | 198.94 | 193.44 |
| 208001    | 2 | 1.64   | 2.12   | 1.87   | 1.94   | 1.80   |
| (321×481) | 3 | 2.57   | 3.16   | 2.81   | 3.01   | 2.67   |
|           | 4 | 26.64  | 31.41  | 28.64  | 29.79  | 27.64  |
|           | 5 | 189.14 | 216.67 | 203.75 | 214.29 | 197.84 |
| 210088    | 2 | 1.54   | 2.02   | 1.70   | 1.84   | 1.62   |
| (321×481) | 3 | 2.55   | 3.03   | 2.73   | 2.86   | 2.68   |
|           | 4 | 24.34  | 29.02  | 25.94  | 27.70  | 24.98  |
|           | 5 | 160.64 | 176.40 | 173.18 | 174.97 | 167.57 |
| 21077     | 2 | 1.55   | 1.89   | 1.71   | 1.83   | 1.62   |
| (481×321) | 3 | 2.49   | 2.99   | 2.76   | 2.83   | 2.69   |
|           | 4 | 30.09  | 35.07  | 32.16  | 33.18  | 31.55  |
|           | 5 | 167.46 | 185.03 | 178.14 | 182.67 | 173.24 |
| 216081    | 2 | 1.43   | 1.98   | 1.61   | 1.80   | 1.53   |
| (481×321) | 3 | 2.51   | 2.94   | 2.67   | 2.88   | 2.62   |
|           | 4 | 26.64  | 30.75  | 28.16  | 29.60  | 27.33  |
|           | 5 | 183.81 | 206.07 | 196.22 | 198.15 | 192.82 |
| 223061    | 2 | 1.55   | 1.97   | 1.69   | 1.85   | 1.62   |
| (481×321) | 3 | 2.64   | 3.22   | 2.82   | 3.05   | 2.74   |
|           | 4 | 27.34  | 31.63  | 29.28  | 30.70  | 28.04  |
|           | 5 | 194.11 | 212.11 | 205.49 | 209.22 | 201.24 |
| 227092    | 2 | 1.73   | 2.26   | 1.92   | 1.97   | 1.79   |
| (321×481) | 3 | 2.61   | 3.03   | 2.86   | 2.95   | 2.78   |
|           | 4 | 28.64  | 33.26  | 31.08  | 32.59  | 29.81  |
|           | 5 | 206.20 | 226.16 | 220.14 | 223.05 | 210.09 |
| 253055    | 2 | 1.68   | 2.15   | 1.90   | 2.01   | 1.82   |
| (481×321) | 3 | 2.70   | 3.17   | 2.93   | 3.11   | 2.87   |
|           | 4 | 30.14  | 34.50  | 32.32  | 33.97  | 31.41  |
|           | 5 | 223.04 | 239.12 | 232.99 | 235.10 | 226.33 |
| 306005    | 2 | 1.40   | 1.77   | 1.59   | 1.69   | 1.52   |

|           |   |        |        |        |        |        |
|-----------|---|--------|--------|--------|--------|--------|
| (481×321) | 3 | 2.52   | 3.10   | 2.69   | 2.89   | 2.62   |
|           | 4 | 27.68  | 32.45  | 29.17  | 30.74  | 28.33  |
|           | 5 | 199.29 | 216.98 | 210.79 | 213.37 | 204.90 |
| 3096      | 2 | 1.61   | 1.96   | 1.80   | 1.87   | 1.70   |
| (481×321) | 3 | 2.73   | 3.20   | 2.92   | 3.05   | 2.83   |
|           | 4 | 29.78  | 34.87  | 31.98  | 33.76  | 30.67  |
|           | 5 | 208.46 | 232.93 | 218.53 | 221.79 | 215.34 |
| 33039     | 2 | 1.31   | 1.76   | 1.55   | 1.64   | 1.41   |
| (321×481) | 3 | 2.43   | 2.89   | 2.68   | 2.77   | 2.59   |
|           | 4 | 25.67  | 29.66  | 27.40  | 28.93  | 26.42  |
|           | 5 | 171.42 | 197.45 | 181.74 | 186.64 | 178.99 |
| 376043    | 2 | 1.36   | 1.86   | 1.52   | 1.79   | 1.42   |
| (321×481) | 3 | 2.38   | 2.81   | 2.62   | 2.76   | 2.48   |
|           | 4 | 26.34  | 30.69  | 28.15  | 29.27  | 27.31  |
|           | 5 | 176.47 | 192.61 | 185.68 | 187.94 | 180.84 |
| 38082     | 2 | 1.27   | 1.72   | 1.43   | 1.55   | 1.36   |
| (481×321) | 3 | 2.36   | 2.86   | 2.54   | 2.70   | 2.46   |
|           | 4 | 24.68  | 29.71  | 26.54  | 29.09  | 25.66  |
|           | 5 | 172.76 | 198.50 | 181.19 | 185.97 | 176.34 |
| 41069     | 2 | 1.71   | 2.19   | 1.94   | 2.07   | 1.81   |
| (481×321) | 3 | 2.92   | 3.48   | 3.19   | 3.35   | 3.12   |
|           | 4 | 30.54  | 35.58  | 33.04  | 33.96  | 31.77  |
|           | 5 | 222.94 | 250.17 | 234.18 | 241.77 | 229.28 |
| 86068     | 2 | 1.66   | 2.01   | 1.86   | 1.97   | 1.74   |
| (481×321) | 3 | 2.63   | 3.20   | 2.82   | 2.90   | 2.74   |
|           | 4 | 28.34  | 32.70  | 30.63  | 31.92  | 29.65  |
|           | 5 | 195.55 | 211.26 | 204.30 | 207.91 | 201.15 |
| 97033     | 2 | 1.57   | 2.03   | 1.78   | 1.97   | 1.67   |
| (481×321) | 3 | 2.76   | 3.25   | 3.00   | 3.15   | 2.86   |
|           | 4 | 29.42  | 33.51  | 31.31  | 32.29  | 30.22  |
|           | 5 | 197.11 | 221.43 | 211.89 | 215.10 | 205.98 |
| 101087    | 2 | 1.26   | 1.65   | 1.42   | 1.56   | 1.33   |
| (321×481) | 3 | 2.52   | 3.11   | 2.76   | 3.06   | 2.66   |
|           | 4 | 26.87  | 31.11  | 29.01  | 30.59  | 27.65  |
|           | 5 | 177.34 | 198.37 | 186.45 | 192.19 | 183.82 |
| 102061    | 2 | 1.43   | 1.94   | 1.64   | 1.80   | 1.50   |
| (321×481) | 3 | 2.66   | 3.15   | 2.92   | 3.06   | 2.78   |
|           | 4 | 28.30  | 32.35  | 30.51  | 31.74  | 29.04  |
|           | 5 | 198.10 | 219.87 | 209.17 | 216.67 | 205.79 |
| 105025    | 2 | 1.52   | 1.99   | 1.74   | 1.81   | 1.61   |
| (481×321) | 3 | 2.64   | 3.24   | 2.90   | 3.00   | 2.77   |
|           | 4 | 28.45  | 33.20  | 30.31  | 32.52  | 29.34  |
|           | 5 | 184.92 | 203.92 | 195.56 | 202.39 | 188.58 |
| 106024    | 2 | 1.35   | 1.71   | 1.55   | 1.62   | 1.45   |

|           |   |         |        |        |        |        |
|-----------|---|---------|--------|--------|--------|--------|
| (481×321) | 3 | 2.33    | 2.79   | 2.54   | 2.69   | 2.43   |
|           | 4 | 26.32   | 30.70  | 28.15  | 29.34  | 27.12  |
|           | 5 | 186.88  | 213.22 | 197.59 | 202.20 | 191.21 |
| 143090    | 2 | 1.43    | 1.93   | 1.58   | 1.71   | 1.49   |
| (481×321) | 3 | 2.35    | 2.79   | 2.57   | 2.67   | 2.45   |
|           | 4 | 27.64   | 32.56  | 29.95  | 31.14  | 28.43  |
|           | 5 | 201.77  | 222.23 | 214.64 | 217.18 | 208.87 |
| 159008    | 2 | 1.50    | 2.04   | 1.65   | 1.90   | 1.58   |
| (481×321) | 3 | 2.34    | 2.85   | 2.55   | 2.78   | 2.45   |
|           | 4 | 26.51   | 31.37  | 28.90  | 30.48  | 27.28  |
|           | 5 | 186.38  | 205.76 | 200.58 | 203.06 | 193.70 |
| 175043    | 2 | 1.41    | 1.88   | 1.64   | 1.80   | 1.48   |
| (481×321) | 3 | 2.50    | 3.02   | 2.72   | 2.87   | 2.64   |
|           | 4 | 28.34   | 32.65  | 30.28  | 31.63  | 29.43  |
|           | 5 | 192.712 | 215.94 | 201.70 | 203.51 | 197.20 |
| 197017    | 2 | 1.38    | 1.89   | 1.58   | 1.67   | 1.52   |
| (481×321) | 3 | 2.44    | 2.95   | 2.66   | 2.86   | 2.59   |
|           | 4 | 27.37   | 32.34  | 29.83  | 31.49  | 28.54  |
|           | 5 | 188.85  | 212.14 | 202.00 | 205.73 | 194.49 |
| 236037    | 2 | 1.64    | 2.05   | 1.86   | 2.01   | 1.74   |
| (481×321) | 3 | 2.76    | 3.18   | 2.96   | 3.11   | 2.90   |
|           | 4 | 28.64   | 33.49  | 30.14  | 31.48  | 29.28  |
|           | 5 | 217.80  | 232.64 | 227.74 | 229.28 | 221.93 |
| 241048    | 2 | 1.24    | 1.71   | 1.44   | 1.66   | 1.32   |
| (481×321) | 3 | 2.39    | 2.85   | 2.63   | 2.71   | 2.55   |
|           | 4 | 25.08   | 30.06  | 27.44  | 28.38  | 26.19  |
|           | 5 | 170.54  | 186.99 | 182.23 | 184.85 | 179.38 |
| 296059    | 2 | 1.36    | 1.72   | 1.52   | 1.65   | 1.42   |
| (481×321) | 3 | 2.34    | 2.84   | 2.61   | 2.78   | 2.54   |
|           | 4 | 25.69   | 30.16  | 27.38  | 29.33  | 26.45  |
|           | 5 | 169.55  | 194.73 | 180.65 | 182.23 | 173.32 |
| 299086    | 2 | 1.47    | 1.82   | 1.61   | 1.72   | 1.54   |
| (481×321) | 3 | 2.61    | 3.11   | 2.84   | 3.03   | 2.71   |
|           | 4 | 29.64   | 33.81  | 31.88  | 32.75  | 30.91  |
|           | 5 | 210.44  | 233.15 | 219.42 | 224.70 | 213.56 |
| 302008    | 2 | 1.41    | 1.96   | 1.63   | 1.77   | 1.55   |
| (321×481) | 3 | 2.36    | 2.86   | 2.57   | 2.79   | 2.47   |
|           | 4 | 26.54   | 31.62  | 28.91  | 30.89  | 27.99  |
|           | 5 | 185.51  | 209.34 | 198.11 | 199.75 | 191.15 |
| 304074    | 2 | 1.62    | 2.03   | 1.82   | 1.96   | 2.74   |
| (321×481) | 3 | 2.61    | 3.18   | 2.93   | 3.06   | 2.82   |
|           | 4 | 33.18   | 38.69  | 35.18  | 36.87  | 34.18  |
|           | 5 | 231.64  | 264.31 | 252.34 | 249.23 | 240.17 |
| 351093    | 2 | 1.35    | 1.71   | 1.50   | 1.56   | 1.41   |

|           |   |        |        |        |        |        |
|-----------|---|--------|--------|--------|--------|--------|
| (481×321) | 3 | 2.37   | 2.97   | 2.62   | 2.74   | 2.49   |
|           | 4 | 28.25  | 32.44  | 30.27  | 31.26  | 29.27  |
|           | 5 | 206.23 | 232.56 | 217.47 | 226.56 | 214.31 |
| 361010    | 2 | 1.51   | 1.94   | 1.66   | 1.77   | 1.58   |
| (481×321) | 3 | 2.57   | 3.00   | 2.82   | 2.93   | 2.72   |
|           | 4 | 28.73  | 33.59  | 30.99  | 32.74  | 30.14  |
|           | 5 | 179.86 | 198.63 | 192.38 | 195.48 | 183.25 |
| 37073     | 2 | 1.39   | 1.71   | 1.58   | 1.64   | 1.44   |
| (481×321) | 3 | 2.36   | 2.80   | 2.61   | 2.73   | 2.55   |
|           | 4 | 29.04  | 33.01  | 30.58  | 31.91  | 29.91  |
|           | 5 | 165.04 | 182.36 | 175.10 | 178.27 | 171.34 |
| 385039    | 2 | 1.62   | 2.17   | 1.86   | 2.09   | 1.79   |
| (481×321) | 3 | 2.64   | 3.23   | 2.88   | 3.10   | 2.78   |
|           | 4 | 26.79  | 30.90  | 28.96  | 29.82  | 28.12  |
|           | 5 | 181.69 | 202.08 | 194.14 | 200.20 | 190.45 |
| 42012     | 2 | 1.29   | 1.69   | 1.53   | 1.61   | 1.43   |
| (321×481) | 3 | 2.36   | 2.84   | 2.60   | 2.72   | 2.48   |
|           | 4 | 22.35  | 26.92  | 24.69  | 25.71  | 23.11  |
|           | 5 | 143.27 | 171.33 | 156.62 | 162.60 | 148.25 |
| 55073     | 2 | 1.62   | 2.07   | 1.86   | 1.92   | 1.77   |
| (321×481) | 3 | 2.71   | 3.23   | 2.95   | 3.04   | 2.89   |
|           | 4 | 29.47  | 33.64  | 31.14  | 32.40  | 30.28  |
|           | 5 | 210.71 | 231.79 | 224.19 | 227.40 | 219.06 |
| 65033     | 2 | 1.42   | 1.81   | 1.56   | 1.77   | 1.48   |
| (481×321) | 3 | 2.87   | 3.48   | 3.13   | 3.20   | 2.98   |
|           | 4 | 30.65  | 35.44  | 32.84  | 34.55  | 31.61  |
|           | 5 | 210.58 | 232.25 | 225.15 | 227.62 | 214.91 |
| 66053     | 2 | 1.58   | 1.93   | 1.76   | 1.88   | 1.65   |
| (481×321) | 3 | 2.53   | 3.08   | 2.81   | 2.92   | 2.75   |
|           | 4 | 30.59  | 35.89  | 32.77  | 33.81  | 31.98  |
|           | 5 | 198.47 | 227.55 | 211.13 | 221.34 | 206.23 |
| 69020     | 2 | 1.57   | 2.07   | 1.75   | 1.98   | 1.64   |
| (481×321) | 3 | 2.52   | 3.02   | 2.79   | 2.91   | 2.65   |
|           | 4 | 29.74  | 34.10  | 32.04  | 33.46  | 31.20  |
|           | 5 | 199.25 | 223.36 | 213.33 | 218.88 | 206.58 |
| 85048     | 2 | 1.15   | 1.53   | 1.36   | 1.45   | 1.25   |
| (481×321) | 3 | 2.02   | 2.63   | 2.26   | 2.57   | 2.12   |
|           | 4 | 19.31  | 24.43  | 21.34  | 22.28  | 20.12  |
|           | 5 | 142.67 | 158.82 | 152.15 | 155.47 | 148.74 |
| 87046     | 2 | 1.32   | 1.87   | 1.56   | 1.74   | 1.38   |
| (481×321) | 3 | 2.31   | 2.93   | 2.49   | 2.88   | 2.42   |
|           | 4 | 24.97  | 29.77  | 27.26  | 28.15  | 26.33  |
|           | 5 | 174.79 | 195.18 | 188.92 | 190.49 | 182.07 |
